# Supplementary material for: Profiles of Small Non-Coding RNAs in Schistosoma japonicum during Development
Source: PLoS Negl Trop Dis. 2011 Aug 2;5(8):e1256. doi: 10.1371/journal.pntd.0001256 (PMC3149011; doi:10.1371/journal.pntd.0001256)
Supplement: Table S3 — Data statistics for the four libraries (SjC, SjL, SjM, and SjF). (XLS) [file pntd.0001256.s003.xls]

## Sheet: Total
Table S3. Data statistics of the four libraries (SjC, SjL, SjM, and SjF)
Class	Total Reads	High-quality Reads	Total Unique Clean Reads	Redundancy(%)a	Perfect Matched Sj Genomeb	%	Total Perfect	%
SjC	22031609	19421649	2252909	88.4	608040	26.9891	11050051	56.8955
SjL	15807920	13313994	2389935	82.0495	584811	24.4697	7145369	53.6681
SjM	16058381	13580030	2472827	81.7907	505995	20.4622	7094600	52.2429
SjF	25696788	19315243	2281132	88.19	728741	31.9465	13924085	72.0886
Total	79594698	65630916	6989949	89.3496	1593604	22.7985	39214105	59.7494
Expressed In Four Libs			290379	4.15424	131050	8.2235
Expressed In Three Libs			363376	5.19855	116415	7.30514
SjC & SjL & SjM			59461		12140
SjC & SjL & SjF			132525		44540
SjC & SjM & SjF			63832		25612
SjL & SjM & SjF			107558		34123
Expressed In Two Libs			808965	11.5733	208003	13.0524
SjC & SjL			175119		35936
SjC & SjM			79247		18331
SjC & SjF			145232		54797
SjL & SjM			117031		20731
SjL & SjF			146201		40396
SjM & SjF			146135		37812
Expressed In One Lib			5527229	79.074	1138136	71.419
SjC			1307114		285634
SjL			1361661		265895
SjM			1609184		226196
SjF			1249270		360411
a Redundancy=100-(Total Unique Clean Reads/Total Clean Reads x 100)
b using soap1.11 aligner: soap.huge -s 6 -v 0 -r 2
																					SjE30				SjE45
																					# of Unique	%	Total sequences	%	# of Unique	%	Total sequences	%
																					151756	2.04064	1780347	2.41225	215964	2.90403	2111022	2.86029
																					15774	0.985213	101160	0.255308	20800	1.29913	124413	0.313994
																					113	0.716369	4588	4.53539	225	1.08173	15412	12.3878
																					475	3.01128	964	0.952946	797	3.83173	1716	1.37928
																					495	3.13808	1147	1.13385	527	2.53365	1290	1.03687
																					465	2.94789	1105	1.09233	473	2.27404	1210	0.972567
																					4	0.0253582	10	0.00988533	6	0.0288462	17	0.0136642
																					0	0	0	0	0	0	0	0
																					26	0.164828	32	0.0316331	48	0.230769	63	0.0506378
																					1936	12.2734	3217	3.18011	2864	13.7692	4929	3.9618
																					180	1.14112	262	0.258996	302	1.45192	504	0.405102
																					551	3.49309	1192	1.17833	842	4.04808	1717	1.38008
																					8596	54.4947	33595	33.2098	10462	50.2981	32874	26.4233
																					2002	12.6918	2524	2.49506	2767	13.3029	3988	3.20545
																					46	0.291619	60	0.059312	67	0.322115	100	0.0803775
																					1876	11.893	3537	3.49644	2707	13.0144	4245	3.41202
																					1113	7.05591	2023	1.9998	1085	5.21635	1748	1.405
																					244	1.54685	571	0.564452	201	0.966346	298	0.239525
																					3315	21.0156	24880	24.5947	3635	17.476	22495	18.0809
																					4159	26.3662	57649	56.9879	5925	28.4856	68192	54.811
