# Supplementary material for: Profiles of Small Non-Coding RNAs in Schistosoma japonicum during Development
Source: PLoS Negl Trop Dis. 2011 Aug 2;5(8):e1256. doi: 10.1371/journal.pntd.0001256 (PMC3149011; doi:10.1371/journal.pntd.0001256)
Supplement: Table S10 — Expression level of siRNAs derived from LTR retrotransposon in cercariae, lung-stage schistosomula, male and female adult worms. (XLS) [file pntd.0001256.s010.xls]

## Sheet: TE_LTR_TPM
Table S10. Expression level of LTR-derived siRNAs
Name	Type	Annotation	Total Expression			SjC Expression		SjL Expression		SjM Expression		SjF Expression
			Total	Sense	Antisense	Sense	Antisense	Sense	Antisense	Sense	Antisense	Sense	Antisense
Sj_Blaster_Grouper_32293_MAP_20	LTR	Novel	23924	19421.9	4502.1	11832.6	2608.3	3571.9	1132.2	1550.8	264.2	2466.6	497.4
Sj_Blaster_Grouper_21464_MAP_14	LTR	Novel	16241.3	13248.3	2993	8186.8	1738.8	2384.1	748.2	1039.3	176.8	1638.1	329.2
Sj_Blaster_Grouper_29322_MAP_3	LTR	Novel	13737.4	4541.6	9195.8	1882.3	4680.9	933.2	1124.1	536	1487.7	1190.1	1903.1
Sj_Blaster_Grouper_33191_MAP_3	LTR	Novel	13082.8	4510.8	8572	1783.7	4334.7	958	1026.4	632.1	1473.7	1137	1737.2
Sj_Blaster_Grouper_22492_MAP_20	LTR	Novel	12647	8367.2	4279.8	4237.5	1737.5	983	899.9	1451.7	572	1695	1070.4
Sj_Blaster_Grouper_20046_MAP_8	LTR	Novel	12411.3	8370.1	4041.2	4247.1	1713.7	986.2	857.8	1447.5	478.5	1689.3	991.2
Sj_Blaster_Recon_4659_MAP_20	LTR	Novel	12396.7	19.9	12376.8	5.4	794.4	2.6	2206.7	3.3	4325.2	8.6	5050.5
Sj_Blaster_Grouper_21706_MAP_10	LTR	Novel	12226.9	4096.8	8130.1	1708.4	4159.4	851.2	925.3	509.3	1404.4	1027.9	1641
Sj_Blaster_Grouper_20316_MAP_13	LTR	Novel	12140	8235.6	3904.4	4195.5	1683.7	956	833.1	1429.6	468.6	1654.5	919
Sj_Blaster_Grouper_18285_MAP_20	LTR	Novel	12121.4	8173.9	3947.5	4210.4	1688.1	924.7	844.1	1401.3	463.3	1637.5	952
Sj_Blaster_Grouper_25669_MAP_8	LTR	Novel	12029.5	8065.3	3964.2	4311.3	1751.5	876.3	829.3	1307	439.9	1570.7	943.5
Sj_Blaster_Grouper_19930_MAP_20	LTR	Novel	11886.7	7805.5	4081.2	4121.4	1694.7	855.2	875.6	1336.3	520.8	1492.6	990.1
Sj_Blaster_Grouper_18970_MAP_20	LTR	Novel	11867.7	9665.9	2201.8	5902.6	1272.9	1770.8	552	770.2	130.9	1222.3	246
Sj_Blaster_Grouper_21809_MAP_3	LTR	Novel	11733.7	7569.9	4163.8	3998.4	1676	866.7	880.7	1288.7	558	1416.1	1049.1
Sj_Blaster_Grouper_19149_MAP_20	LTR	Novel	11536.6	7655.4	3881.2	4057	1607.8	828.8	838.4	1322.9	503.9	1446.7	931.1
Sj_Blaster_Grouper_21458_MAP_3	LTR	Novel	11515.7	7649.5	3866.2	4026.4	1661.7	888.4	820.6	1308	459.1	1426.7	924.8
Sj_Blaster_Grouper_18486_MAP_4	LTR	Novel	11384.3	3617	7767.3	1590.3	4049.1	786.6	840	403.5	1349.8	836.6	1528.4
Sj_Blaster_Grouper_21832_MAP_4	LTR	Novel	11269.4	7352.7	3916.7	3900.1	1607.9	833.1	803.3	1250.7	514.9	1368.8	990.6
Sj_Blaster_Grouper_21808_MAP_4	LTR	Novel	11238.9	7397.9	3841	3914.2	1582.8	842.3	784.8	1272.9	512.8	1368.5	960.6
Sj_Blaster_Grouper_16725_MAP_20	LTR	Novel	11227.4	3641	7586.4	1589.3	4080.8	776.3	799.6	430.7	1282.9	844.7	1423.1
Sj_Blaster_Grouper_19889_MAP_7	LTR	Novel	11224.3	7375.8	3848.5	3936.2	1646.7	816.6	822.5	1253.3	455.6	1369.7	923.7
Sj_Blaster_Grouper_14014_MAP_20	LTR	Novel	11188	7559.6	3628.4	4044.2	1593.1	804.7	788.9	1289.8	404.5	1420.9	841.9
Sj_Blaster_Piler_258.2_MAP_11	LTR	Novel	11125.3	3562.6	7562.7	1587.5	4059.5	773.9	798.7	400.9	1283.2	800.3	1421.3
Sj_Blaster_Grouper_20808_MAP_4	LTR	Novel	11044.4	3842.7	7201.7	1586.1	3864.1	794.7	787.7	505	1220.3	956.9	1329.6
Sj_Blaster_Grouper_20816_MAP_3	LTR	Novel	11017	3752.3	7264.7	1559	3881	773	805.5	498.7	1246.3	921.6	1331.9
Sj_Blaster_Grouper_15502_MAP_3	LTR	Novel	10994.3	7386.6	3607.7	4002.7	1552.8	764.2	752.1	1244.5	455.7	1375.2	847.1
Sj_Blaster_Grouper_30665_MAP_3	LTR	NONAUT-5_1p	10969.8	6150.5	4819.3	2386.4	1250.1	1283	1318.5	1359.2	1238.4	1121.9	1012.3
Sj_Blaster_Grouper_14280_MAP_20	LTR	Novel	10931.2	3597.3	7333.9	1548.6	3977.1	749.1	754.8	455	1239.1	844.6	1362.9
Sj_Blaster_Recon_2785_MAP_19	LTR	Novel	10922.1	68.9	10853.2	38.6	2504.1	21.1	4326.4	2	3007.6	7.2	1015.1
Sj_Blaster_Grouper_18474_MAP_4	LTR	Novel	10824.1	3767.6	7056.5	1570.3	3829.8	816	743.7	479.9	1200.6	901.4	1282.4
Sj_Blaster_Grouper_11280_MAP_20	LTR	Novel	10799.1	7340.3	3458.8	3990.5	1537.2	752.6	711.2	1237.1	401.7	1360.1	808.7
Sj_Blaster_Grouper_13288_MAP_4	LTR	Novel	10721.2	7284.4	3436.8	3951.8	1528.1	743.9	704.5	1234.6	399.5	1354.1	804.7
Sj_Blaster_Piler_314.2_MAP_5	LTR	Novel	10675.9	3351.1	7324.8	1529.2	3974.4	702.2	753.7	361.3	1238	758.4	1358.7
Sj_Blaster_Grouper_29562_MAP_11	LTR	Novel	10631.9	6034.8	4597.1	2341.7	1184.4	1266.2	1283.3	1323.3	1160.8	1103.6	968.6
Sj_Blaster_Grouper_23506_MAP_14	LTR	Novel	10627.3	6364.6	4262.7	2572.1	1132.4	1378.7	1226.3	1301.2	1019	1112.6	885
Sj_Blaster_Grouper_24709_MAP_4	LTR	Novel	10626.7	6198.4	4428.3	2510.9	1225.9	1348.4	1246.5	1257.5	1042.2	1081.6	913.7
Sj_Blaster_Grouper_3037_MAP_20	LTR	Novel	10596.2	7281.5	3314.7	3953.6	1516.3	745.4	690.2	1233.8	359.3	1348.7	748.9
Sj_Blaster_Grouper_5601_MAP_5	LTR	Novel	10570.3	7250.8	3319.5	3938.4	1515.6	738.4	693.7	1230.4	358.9	1343.6	751.3
Sj_Blaster_Recon_7990_MAP_6	LTR	Novel	10471.1	1983.8	8487.3	1148.8	5165.1	503.7	1571.8	113.8	676.4	217.5	1074
Sj_Blaster_Grouper_29023_MAP_12	LTR	Novel	10398.9	6036.6	4362.3	2345.2	1123.9	1261.6	1221.1	1335	1111.5	1094.8	905.8
Sj_Blaster_Grouper_25360_MAP_3	LTR	Novel	10384.9	4299	6085.9	1127.1	2472.5	1223.1	1320.7	1040.9	1234.2	907.9	1058.5
Sj_Blaster_Grouper_31295_MAP_7	LTR	Novel	10348.2	10279.9	68.3	2372.4	38.2	4077.7	21.1	2866.9	2	962.9	7
Sj_Blaster_Grouper_25037_MAP_10	LTR	Novel	10342	6277.9	4064.1	2542.6	1073.3	1358.2	1173.2	1290.2	990.7	1086.9	826.9
Sj_Blaster_Grouper_31354_MAP_3	LTR	Novel	10321.4	3437.1	6884.3	1536.3	3912.2	696.8	676	386.5	1078.5	817.5	1217.6
Sj_Blaster_Grouper_29347_MAP_10	LTR	Novel	10315.6	5996.9	4318.7	2321.3	1093.4	1257.7	1215.4	1319.7	1101.4	1098.2	908.5
Sj_Blaster_Recon_301_MAP_20	LTR	BN000804_1p	10302.2	4438.3	5863.9	2756.3	2427.9	690.8	1825.6	492	797.5	499.2	812.9
Sj_Blaster_Grouper_33201_MAP_11	LTR	Novel	10281	3602	6679	1376.8	3374.2	702.6	950.6	406.2	770.7	1116.4	1583.5
Sj_Blaster_Grouper_27110_MAP_9	LTR	Novel	10243.1	6171.1	4072	2525.8	1058.1	1349.3	1171	1268.1	990.6	1027.9	852.3
Sj_Blaster_Grouper_31435_MAP_5	LTR	Novel	10119.4	3615.7	6503.7	1509.5	3724.5	758.7	628.9	492.4	1076	855.1	1074.3
Sj_Blaster_Grouper_29969_MAP_7	LTR	NONAUT-5_1p	10102.1	5883	4219.1	2291.2	1059.1	1239.4	1196.6	1293.4	1080.4	1059	883
Sj_Blaster_Grouper_12454_MAP_5	LTR	Novel	10040.8	6929.2	3111.6	3668.1	1456.2	736.1	657.5	1218.9	339.6	1306.1	658.3
Sj_Blaster_Grouper_12116_MAP_4	LTR	Novel	10021.3	3487.4	6533.9	1501	3719	726.3	644	440.5	1083.8	819.6	1087.1
Sj_Blaster_Grouper_22220_MAP_12	LTR	Novel	10009	6247.7	3761.3	2528.1	1018.2	1350.3	1095.1	1288.2	893.6	1081.1	754.4
Sj_Blaster_Grouper_21211_MAP_11	LTR	Novel	9974.8	6171.1	3803.7	2508.4	1036.2	1328.9	1114.3	1274	894.1	1059.8	759.1
Sj_Blaster_Grouper_3076_MAP_20	LTR	Novel	9942.5	3449.4	6493.1	1481.6	3709.4	718	629.3	439	1076.7	810.8	1077.7
Sj_Blaster_Grouper_15834_MAP_4	LTR	Novel	9932.4	6631	3301.4	3760.2	1499.6	666.8	694.4	1095.9	355.6	1108.1	751.8
Sj_Blaster_Grouper_2949_MAP_3	LTR	Novel	9913.1	6462.2	3450.9	3696.2	1482.5	625.2	718.4	1075.7	439	1065.1	811
Sj_Blaster_Grouper_5664_MAP_3	LTR	Novel	9907.2	6456.3	3450.9	3692.6	1482.7	624.6	718.2	1075	439.1	1064.1	810.9
Sj_Blaster_Grouper_29476_MAP_3	LTR	Novel	9869.5	4068.3	5801.2	1025.6	2302.4	1165.5	1265.1	1044.5	1183.2	832.7	1050.5
Sj_Blaster_Grouper_10683_MAP_3	LTR	Novel	9850.8	6505.3	3345.5	3704.9	1487.8	638.1	688.1	1080.7	386.5	1081.6	783.1
Sj_Blaster_Grouper_29955_MAP_6	LTR	Novel	9840.4	5639.3	4201.1	2209.5	1041.9	1204.7	1185.3	1256.9	1092.2	968.2	881.7
Sj_Blaster_Piler_198.2_MAP_6	LTR	Novel	9816.4	6317.1	3499.3	3141.7	1340.5	928.8	683.6	739.6	380.1	1507	1095.1
Sj_Blaster_Grouper_15706_MAP_4	LTR	Novel	9798.6	6449.9	3348.7	3687.1	1482.7	621	688.1	1072.5	391.3	1069.3	786.6
Sj_Blaster_Grouper_25720_MAP_12	LTR	Novel	9783.8	5792.2	3991.6	2300.6	1072.3	1214.4	1150.4	1231.2	946.1	1046	822.8
Sj_Blaster_Grouper_5148_MAP_8	LTR	Novel	9766.1	3309.6	6456.5	1468.8	3691.3	679.7	621.4	385.6	1072.4	775.5	1071.4
Sj_Blaster_Piler_192.2_MAP_14	LTR	Novel	9762.9	3308	6454.9	1468.3	3690.5	679.3	621.6	385.4	1071.9	775	1070.9
Sj_Blaster_Grouper_2838_MAP_20	LTR	Novel	9670.6	6450.6	3220	3692	1468.4	623.4	674	1073.2	350.5	1062	727.1
Sj_Blaster_Grouper_3127_MAP_3	LTR	Novel	9663	3211.8	6451.2	1464.5	3690.4	672.2	621.1	349.3	1071.5	725.8	1068.2
Sj_Blaster_Grouper_26131_MAP_4	LTR	Novel	9582.7	5446	4136.7	2179.4	1078.9	1230.1	1183.5	1131.5	1000	905	874.3
Sj_Blaster_Grouper_27181_MAP_9	LTR	Novel	9502.1	3956.4	5545.7	1050.2	2377.6	1138.7	1152.6	964.4	1141.9	803.1	873.6
Sj_Blaster_Grouper_21653_MAP_15	LTR	Novel	9482.4	5601.6	3880.8	2366.3	1018.7	1162.8	1125.6	1154.5	954.3	918	782.2
Sj_Blaster_Grouper_19399_MAP_3	LTR	Novel	9476.3	4935.3	4541	1599.2	1586.1	1030.1	1090.8	670.6	558.5	1635.4	1305.6
Sj_Blaster_Grouper_23644_MAP_14	LTR	Novel	9463.3	3869.3	5594	1015	2364	1122.4	1160.5	950.8	1153.9	781.1	915.6
Sj_Blaster_Recon_5332_MAP_5	LTR	Novel	9319.2	9318	1.2	1126.2	0.6	1615.3	0.1	3603	0.2	2973.5	0.3
Sj_Blaster_Grouper_22441_MAP_3	LTR	Novel	9285.3	5783.4	3501.9	2175.8	1136.5	1120.3	862.4	737.3	437.6	1750	1065.4
Sj_Blaster_Grouper_17344_MAP_20	LTR	Novel	9198.8	1782.2	7416.6	1030.5	4445.8	451.8	1393.2	102.9	604.9	197	972.7
Sj_Blaster_Grouper_22444_MAP_3	LTR	Novel	9180.8	3606.3	5574.5	893.2	2319.4	1071.9	1188.7	903.9	1127.5	737.3	938.9
Sj_Blaster_Grouper_19158_MAP_20	LTR	Novel	9146.6	5322.7	3823.9	2241.5	1021.4	1112	1093	1103.3	942.8	865.9	766.7
Sj_Blaster_Grouper_24352_MAP_3	LTR	Novel	9113.3	3298.1	5815.2	899	2432.2	881.3	1209.8	821.2	1205.5	696.6	967.7
Sj_Blaster_Grouper_31388_MAP_4	LTR	NONAUT-3_1p	9090.9	3780.8	5310.1	1071.6	2277	902.9	1054.2	612.9	712	1193.4	1266.9
Sj_Blaster_Grouper_29905_MAP_7	LTR	Novel	9080	3863.8	5216.2	980	2162.7	1097.3	1050.7	1006.6	1137.5	779.9	865.3
Sj_Blaster_Grouper_15556_MAP_20	LTR	Novel	9034.8	7420.6	1614.2	4658.4	932.9	1298.8	402.9	570.8	98.3	892.6	180.1
Sj_Blaster_Grouper_20676_MAP_6	LTR	Novel	8989.7	3686.6	5303.1	1002.8	2268.7	1074.4	1113.5	873.4	1108	736	812.9
Sj_Blaster_Grouper_29348_MAP_5	LTR	Novel	8947.8	3592	5355.8	939.5	2188.4	1063.2	1192.3	855.5	1110.9	733.8	864.2
Sj_Blaster_Grouper_28548_MAP_16	LTR	Novel	8939.2	5945.9	2993.3	3095.7	1149.7	764.9	611.8	778.3	370.2	1307	861.6
Sj_Blaster_Grouper_29327_MAP_3	LTR	Novel	8916.2	2577.6	6338.6	360.3	602.6	337.8	959	86.4	490.5	1793.1	4286.5
Sj_Blaster_Grouper_28335_MAP_10	LTR	Novel	8909.5	4029.2	4880.3	1022.1	1838.3	1149.5	1064.7	1012.1	1057.2	845.5	920.1
Sj_Blaster_Grouper_35021_MAP_3	LTR	NONAUT-3_1p	8845.9	4327.4	4518.5	1724.3	1833.2	943.6	1112.9	585.8	575.4	1073.7	997
Sj_Blaster_Grouper_28197_MAP_5	LTR	Novel	8827.2	2529.8	6297.4	364.9	589.2	336.3	907	85.8	489.2	1742.8	4312
Sj_Blaster_Grouper_25596_MAP_11	LTR	Novel	8825.5	3990.3	4835.2	1089.7	1937.7	1119.9	967.1	957.4	1051.9	823.3	878.5
Sj_Blaster_Grouper_20962_MAP_5	LTR	Novel	8807.4	3936.2	4871.2	1297.9	1565	908.4	985.5	488.1	670	1241.8	1650.7
Sj_Blaster_Grouper_31210_MAP_7	LTR	Novel	8726.3	3319.3	5407	863.3	2221	1004.6	1195.9	777.5	1123.9	673.9	866.2
Sj_Blaster_Grouper_29963_MAP_7	LTR	Novel	8658	5388.3	3269.7	1983.1	805.5	1190.1	881.8	1204.2	879.3	1010.9	703.1
Sj_Blaster_Grouper_31972_MAP_3	LTR	SACI-5_1p	8573.1	5366.5	3206.6	2097.3	1206.7	923.8	591.4	592.3	345	1753.1	1063.5
Sj_Blaster_Grouper_29435_MAP_5	LTR	Novel	8535.1	4570.4	3964.7	1878.9	1032.5	873.9	1096.7	1031.5	1041	786.1	794.5
Sj_Blaster_Piler_224.114_MAP_3	LTR	Novel	8528.3	3306.4	5221.9	850.1	1963.7	858.7	1138.5	891.5	1132.6	706.1	987.1
Sj_Blaster_Grouper_21164_MAP_3	LTR	Novel	8505.5	18.6	8486.9	5.1	554.2	2.5	1468.1	2.9	2864.8	8.1	3599.8
Sj_Blaster_Grouper_18682_MAP_9	LTR	Novel	8455.6	3349.9	5105.7	902.9	2166.5	979.8	1029	809.3	1078	657.9	832.2
Sj_Blaster_Grouper_16573_MAP_20	LTR	Novel	8431	4959.2	3471.8	2114.7	932	1005.5	1021.8	1036.8	827.2	802.2	690.8
Sj_Blaster_Grouper_27793_MAP_13	LTR	Novel	8426	3754.4	4671.6	978.8	1903.2	1059.1	900.9	966.9	1071.3	749.6	796.2
Sj_Blaster_Grouper_17393_MAP_4	LTR	Novel	8425.3	3230.2	5195.1	1090.2	2121.6	801.1	959.4	384.9	611.3	954	1502.8
Sj_Blaster_Grouper_18047_MAP_8	LTR	Novel	8254.4	3341.6	4912.8	881.5	2090.8	960.1	993.6	830.2	1022.7	669.8	805.7
Sj_Blaster_Grouper_33196_MAP_15	LTR	Novel	8189.1	2739.6	5449.5	1011.9	2589.8	555.4	745.3	393.6	848.9	778.7	1265.5
Sj_Blaster_Grouper_33124_MAP_9	LTR	Novel	8168.3	2590	5578.3	1033.2	2927.8	491.4	693.9	311.8	688	753.6	1268.6
Sj_Blaster_Grouper_21121_MAP_20	LTR	Novel	8150.1	4627	3523.1	1998.5	898.3	949.9	1025.5	979.1	884.9	699.5	714.4
Sj_Blaster_Grouper_19552_MAP_5	LTR	Novel	8145.1	3579.3	4565.8	973.5	1947.8	1031.5	982.4	856.7	946.8	717.6	688.8
Sj_Blaster_Grouper_22752_MAP_4	LTR	Novel	8116.4	3381.3	4735.1	851.6	2066.5	1011.8	987.7	831.9	988.9	686	692
Sj_Blaster_Grouper_29354_MAP_8	LTR	Novel	8113.2	5352.8	2760.4	2450.5	1109.8	789.5	558	839.7	329.6	1273.1	763
Sj_Blaster_Grouper_23550_MAP_20	LTR	SACI-5_1p	8077.9	5353.7	2724.2	2527.4	998.1	746.3	559.1	860	393.3	1220	773.7
Sj_Blaster_Grouper_25566_MAP_3	LTR	Novel	8066.1	5013	3053.1	1897.1	816.6	1108.8	819.8	1075.4	781.5	931.7	635.2
Sj_Blaster_Grouper_19588_MAP_5	LTR	Novel	8031.1	3081.7	4949.4	744.9	2129.9	957.3	1045.1	749.6	1027.4	629.9	747
Sj_Blaster_Grouper_28206_MAP_12	LTR	Novel	8019.7	4607.3	3412.4	1679.8	847.9	1029	913.3	1062.7	919.4	835.8	731.8
Sj_Blaster_Grouper_21891_MAP_20	LTR	Novel	8014.2	2717.1	5297.1	992	2507	558.2	732.4	393.9	851.2	773	1206.5
Sj_Blaster_Grouper_28890_MAP_3	LTR	SACI-7_2p	8010.9	4331.9	3679	1858	1428.2	811.7	896.2	733.4	553.1	928.8	801.5
Sj_Blaster_Grouper_28790_MAP_11	LTR	Novel	7999.7	4314.8	3684.9	1744.6	934.5	837.8	1030	981	978.8	751.4	741.6
Sj_Blaster_Grouper_15340_MAP_5	LTR	Novel	7989.5	3261.7	4727.8	920.1	2023.9	929.7	956.1	771	983.1	640.9	764.7
Sj_Blaster_Grouper_21497_MAP_9	LTR	Novel	7979.5	4532.9	3446.6	1909.3	885.9	924.9	992	939.6	871.8	759.1	696.9
Sj_Blaster_Grouper_31600_MAP_4	LTR	Novel	7964.5	5840.1	2124.4	2889.8	873.7	689	422.5	976.3	263.9	1285	564.3
Sj_Blaster_Grouper_17157_MAP_3	LTR	Novel	7842.1	2851.9	4990.2	730.4	2125.9	848.3	1013.3	700.8	1030.1	572.4	820.9
Sj_Blaster_Grouper_20527_MAP_3	LTR	Novel	7806.4	4650.9	3155.5	1977.5	830.6	953.9	905.1	942.1	792.3	777.4	627.5
Sj_Blaster_Grouper_18333_MAP_20	LTR	Novel	7780.1	2632.4	5147.7	967.3	2462.5	546.5	693.4	382.6	823.8	736	1168
Sj_Blaster_Recon_591_MAP_20	LTR	Novel	7772.8	4893.2	2879.6	1965.2	701	1068.2	847.1	1069.8	689.4	790	642.1
Sj_Blaster_Grouper_22856_MAP_8	LTR	Novel	7763.3	4457.9	3305.4	1895.5	830.4	967.8	970.2	934.2	826	660.4	678.8
Sj_Blaster_Grouper_12862_MAP_20	LTR	Novel	7749.5	6344.7	1404.8	3975.8	819.4	1117.7	348.3	487.9	83.2	763.3	153.9
Sj_Blaster_Grouper_22352_MAP_20	LTR	Novel	7676.1	2531.4	5144.7	939.7	2444.3	489	708.9	364.5	821	738.2	1170.5
Sj_Blaster_Grouper_27042_MAP_3	LTR	Novel	7625.2	2204.6	5420.6	306.5	501.9	289.6	825.9	73.6	432.2	1534.9	3660.6
Sj_Blaster_Grouper_26966_MAP_3	LTR	Novel	7617.4	2792.8	4824.6	1026.2	1841.1	530.9	875.5	342.6	641.6	893.1	1466.4
Sj_Blaster_Grouper_28825_MAP_6	LTR	Novel	7550.9	5129.1	2421.8	2699.3	943.6	632.5	470	678.6	309.3	1118.7	698.9
Sj_Blaster_Grouper_29767_MAP_3	LTR	SACI-7_2p	7420.2	3517.4	3902.8	1343.5	1686	851.1	739.1	533.8	645.6	789	832.1
Sj_Blaster_Grouper_34792_MAP_3	LTR	Novel	7334.4	4884	2450.4	507.4	349.3	702	320.8	393.9	80.4	3280.7	1699.9
Sj_Blaster_Grouper_20513_MAP_18	LTR	Novel	7333.5	3109.8	4223.7	903.9	1759.4	876.7	907.2	676.3	776.9	652.9	780.2
Sj_Blaster_Grouper_24966_MAP_3	LTR	Novel	7324.2	4261.2	3063	1678.6	812.3	986.9	847.6	891	752.8	704.7	650.3
Sj_Blaster_Grouper_29522_MAP_3	LTR	NONAUT-5_1p	7285.9	4020.9	3265	1728.7	840	793.6	977.7	876.7	780.4	621.9	666.9
Sj_Blaster_Grouper_23234_MAP_3	LTR	Novel	7285.6	4161.7	3123.9	1736.2	929.5	901.7	875.4	755.7	670.1	768.1	648.9
Sj_Blaster_Grouper_32497_MAP_14	LTR	Novel	7275.7	2540.3	4735.4	1006.1	2431.4	479.8	637.2	326.3	648.3	728.1	1018.5
Sj_Blaster_Grouper_28857_MAP_5	LTR	Novel	7141.7	4493.3	2648.4	2508.7	1209.8	472.2	508.2	507.6	225.5	1004.8	704.9
Sj_Blaster_Grouper_28625_MAP_17	LTR	Novel	7118.8	3287.5	3831.3	952.6	1519.7	895.3	787.5	754.5	768.8	685.1	755.3
Sj_Blaster_Grouper_29018_MAP_15	LTR	Novel	7094.2	4520.9	2573.3	2557.3	984.1	545.4	493.3	518	346.9	900.2	749
Sj_Blaster_Grouper_35010_MAP_5	LTR	NONAUT-3_1p	7070.6	4282.5	2788.1	1852.4	797.5	889.7	654.1	568.1	460.1	972.3	876.4
Sj_Blaster_Grouper_17125_MAP_20	LTR	Novel	6992.4	4588.9	2403.5	2336.1	899.3	578.5	504.2	717.1	345.4	957.2	654.6
Sj_Blaster_Grouper_34415_MAP_3	LTR	SACI-7_2p	6931.6	3951	2980.6	1514.4	1513.4	1187.9	613.4	422.5	273	826.2	580.8
Sj_Blaster_Grouper_14866_MAP_4	LTR	Novel	6930.9	4906.5	2024.4	2061.7	1192.5	1545.3	323.9	659.9	252.8	639.6	255.2
Sj_Blaster_Grouper_20294_MAP_14	LTR	Novel	6906.3	4347.7	2558.6	2209.4	916.2	579.3	555.4	676.3	388.3	882.7	698.7
Sj_Blaster_Grouper_19927_MAP_20	LTR	Novel	6884.3	4307.2	2577.1	2186.5	924.9	571.1	528.8	673	391.8	876.6	731.6
Sj_Blaster_Grouper_16284_MAP_12	LTR	Novel	6866.4	3076.2	3790.2	822.1	1698.8	914.9	754.3	722.2	804.5	617	532.6
Sj_Blaster_Grouper_21176_MAP_20	LTR	Novel	6863.5	2506.6	4356.9	888.3	2193.9	494.3	597.4	403.8	674.3	720.2	891.3
Sj_Blaster_Grouper_31940_MAP_6	LTR	Novel	6810.5	1916	4894.5	268	449.4	254.6	733.1	64.3	381.8	1329.1	3330.2
Sj_Blaster_Grouper_12427_MAP_20	LTR	Novel	6787.2	1266.1	5521.1	733.3	3368.6	318.6	1012	74.6	441.2	139.6	699.3
Sj_Blaster_Grouper_28233_MAP_5	LTR	Novel	6717.7	4731.9	1985.8	451.5	276.1	707.9	260.3	383.5	66.6	3189	1382.8
Sj_Blaster_Grouper_29708_MAP_3	LTR	Novel	6663.1	2764.9	3898.2	718.8	1654.9	826.4	827	665.2	852.2	554.5	564.1
Sj_Blaster_Piler_289.2_MAP_3	LTR	Novel	6631.1	4543.6	2087.5	2288.4	812.5	617.8	409.9	701.8	299.3	935.6	565.8
Sj_Blaster_Grouper_32967_MAP_17	LTR	Novel	6588.8	2348.6	4240.2	802.4	1885.8	430.2	659.6	270.6	472.9	845.4	1221.9
Sj_Blaster_Piler_477.241_MAP_3	LTR	Novel	6567.3	3283.2	3284.1	1433.9	1612.7	1019.6	719.2	339.4	435.2	490.3	517
Sj_Blaster_Piler_557.2_MAP_4	LTR	Novel	6523.3	2551	3972.3	1072.8	1760.1	560.6	553.9	282.1	681.7	635.5	976.6
Sj_Blaster_Grouper_18216_MAP_3	LTR	Novel	6518.8	3687.9	2830.9	1529.7	684.2	778	872.6	817	692.2	563.2	581.9
Sj_Blaster_Grouper_29449_MAP_3	LTR	Novel	6496.2	4756.3	1739.9	420.2	247.6	702.7	230.6	376.1	57.8	3257.3	1203.9
Sj_Blaster_Grouper_29197_MAP_4	LTR	Novel	6492.1	2987.7	3504.4	1131.1	1511.3	744.5	726.7	427.7	538.9	684.4	727.5
Sj_Blaster_Grouper_30833_MAP_4	LTR	Novel	6474.9	3372.3	3102.6	1370	1651.6	974.7	578.6	346.5	296	681.1	576.4
Sj_Blaster_Grouper_20354_MAP_20	LTR	Novel	6461.3	2525.8	3935.5	663.4	1542.1	688.4	847.3	667.3	864.9	506.7	681.2
Sj_Blaster_Grouper_29091_MAP_3	LTR	Novel	6443.2	2283	4160.2	868.3	2348.5	447	489.3	339.6	513.1	628.1	809.3
Sj_Blaster_Grouper_26306_MAP_3	LTR	Novel	6442	2155.4	4286.6	301.1	442.9	280.5	625.4	70.6	345.3	1503.2	2873
Sj_Blaster_Grouper_31427_MAP_3	LTR	Novel	6411.5	2201.6	4209.9	307.6	460.7	284.5	625.2	72.6	340.2	1536.9	2783.8
Sj_Blaster_Grouper_28295_MAP_8	LTR	Novel	6366.7	3646.9	2719.8	1595.3	796.7	742.8	762.9	683.3	621.7	625.5	538.5
Sj_Blaster_Grouper_25823_MAP_12	LTR	Novel	6313.4	3922.7	2390.7	2207.5	924.5	462.8	471	519	346	733.4	649.2
Sj_Blaster_Grouper_30832_MAP_3	LTR	BN000804_1p	6307.6	3205	3102.6	1256.8	2141	953.9	310.5	450.2	295.5	544.1	355.6
Sj_Blaster_Grouper_33078_MAP_16	LTR	Novel	6305.8	1787.3	4518.5	688.6	2016.1	338.7	725.3	140.2	447.6	619.8	1329.5
Sj_Blaster_Grouper_31661_MAP_3	LTR	GYPSY2_AGp	6277.9	3486.3	2791.6	1458.5	1430.2	1009	565.9	339.6	258.6	679.2	536.9
Sj_Blaster_Grouper_29865_MAP_4	LTR	Novel	6266.4	4210.2	2056.2	423.5	287.3	615	279.1	334.6	68.6	2837.1	1421.2
Sj_Blaster_Grouper_15608_MAP_4	LTR	Novel	6257.8	2264.6	3993.2	570.6	1822.6	658.4	765.8	575.2	847.3	460.4	557.5
Sj_Blaster_Grouper_31660_MAP_3	LTR	GYPSY2_AGp	6219.6	3728.7	2490.9	1443.3	1271.7	1175.5	507.2	380.8	232	729.1	480
Sj_Blaster_Grouper_22355_MAP_4	LTR	Novel	6213.4	3401.1	2812.3	1442.3	818.2	766.3	795.5	611.9	602.1	580.6	596.5
Sj_Blaster_Grouper_16880_MAP_11	LTR	Novel	6211.4	2482.5	3728.9	643.7	1486.7	676.9	809.9	661.7	837	500.2	595.3
Sj_Blaster_Grouper_19500_MAP_6	LTR	Novel	6202	3790.1	2411.9	1509.2	621.7	828.3	653.5	850	651.1	602.6	485.6
Sj_Blaster_Grouper_31624_MAP_3	LTR	SACI-7_2p	6189.5	2551.9	3637.6	1289.1	1372.6	524.4	1126.5	249.7	384.6	488.7	753.9
Sj_Blaster_Grouper_26158_MAP_11	LTR	Novel	6145.3	4223	1922.3	1616.2	422	975.7	558.3	894.1	508.8	737	433.2
Sj_Blaster_Grouper_34014_MAP_3	LTR	NONAUT-3_1p	6139.9	2727.2	3412.7	786.5	1392.7	663.4	683.8	432.4	468.3	844.9	867.9
Sj_Blaster_Grouper_31303_MAP_5	LTR	Novel	6136.9	3376.6	2760.3	1300.6	1468.1	1039.3	543.3	353.4	237.7	683.3	511.2
Sj_Blaster_Grouper_33199_MAP_15	LTR	SACI-5_1p	6112.3	1780.7	4331.6	686.4	1927.4	338.5	699.2	141.3	438.7	614.5	1266.3
Sj_Blaster_Grouper_28178_MAP_6	LTR	Novel	6074	1976.4	4097.6	274.5	421	259.4	616.9	66.2	333.7	1376.3	2726
Sj_Blaster_Grouper_27007_MAP_6	LTR	Novel	6064.3	2483.8	3580.5	750	1334.9	648.1	695.3	261.1	401	824.6	1149.3
Sj_Blaster_Grouper_28355_MAP_4	LTR	Novel	6047.9	3206.9	2841	1298.1	1067.7	618.9	670.6	571.7	458.3	718.2	644.4
Sj_Blaster_Grouper_30325_MAP_3	LTR	Novel	6046.6	4177.5	1869.1	409.9	259.8	630.3	245.4	340.9	62.5	2796.4	1301.4
Sj_Blaster_Grouper_30754_MAP_3	LTR	SACI-7_2p	6046.2	2613.1	3433.1	1139.4	1973.6	714.9	570.1	239.3	284	519.5	605.4
Sj_Blaster_Recon_5036_MAP_6	LTR	Novel	6031.7	10.8	6020.9	1.2	1501.3	0.6	1062.9	2.6	1836.8	6.4	1619.9
Sj_Blaster_Grouper_24986_MAP_4	LTR	Novel	6023.4	4133.7	1889.7	1601.8	416.3	948.2	550.6	869.3	498.4	714.4	424.4
Sj_Blaster_Piler_711.114_MAP_3	LTR	Novel	6016.5	3900.7	2115.8	1572.8	542.9	831	571.2	866.9	564.7	630	437
Sj_Blaster_Grouper_24744_MAP_20	LTR	Novel	6015.7	1764.7	4251	244.7	405.3	232.6	638.2	59.5	343.2	1227.9	2864.3
Sj_Blaster_Grouper_31625_MAP_7	LTR	Novel	6007	4186.3	1820.7	1814.6	650.5	763.2	369.5	356.6	148.2	1251.9	652.5
Sj_Blaster_Grouper_27873_MAP_3	LTR	Novel	6000.8	4364.7	1636.1	392.4	229.2	652.2	218.2	344.2	55.8	2975.9	1132.9
Sj_Blaster_Grouper_18090_MAP_10	LTR	Novel	5987.4	3713.9	2273.5	2051.3	838.8	448.7	479.2	552.2	331.4	661.7	624.1
Sj_Blaster_Grouper_31849_MAP_20	LTR	NONAUT-5_1p	5947.7	3169	2778.7	1570.8	1252.3	696.5	879.3	429.6	315.7	472.1	331.4
Sj_Blaster_Grouper_33019_MAP_6	LTR	Novel	5936.9	3965.6	1971.3	411.1	281	580.1	258.9	324.9	66.5	2649.5	1364.9
Sj_Blaster_Grouper_35124_MAP_3	LTR	Novel	5894.5	3850.6	2043.9	411	291.1	567.1	268	304.7	67.7	2567.8	1417.1
Sj_Blaster_Grouper_33884_MAP_5	LTR	Novel	5885.6	4233.3	1652.3	390.4	230.6	637.1	217.3	342.2	55.5	2863.6	1148.9
Sj_Blaster_Grouper_24233_MAP_9	LTR	Novel	5868.6	1652.3	4216.3	229.8	388.9	217.1	633.3	55.5	340.3	1149.9	2853.8
Sj_Blaster_Grouper_25750_MAP_5	LTR	Novel	5866.6	3124.8	2741.8	1545.8	1230.9	685.9	874	426.6	311.4	466.5	325.5
Sj_Blaster_Grouper_22804_MAP_20	LTR	NONAUT-3_1p	5858.4	2630.3	3228.1	755.7	1340.7	623.8	639.7	427.9	444.4	822.9	803.3
Sj_Blaster_Grouper_11394_MAP_4	LTR	Novel	5834.7	3604.4	2230.3	1479.3	624.3	790.4	605.1	773.1	561.1	561.6	439.8
Sj_Blaster_Grouper_28019_MAP_3	LTR	Novel	5832.3	2708	3124.3	1245.6	1564	857.7	683.3	288.6	419.3	316.1	457.7
Sj_Blaster_Grouper_31419_MAP_15	LTR	Novel	5831.8	3829.8	2002	2148.7	828.9	441.5	395.4	503.2	250	736.4	527.7
Sj_Blaster_Grouper_27795_MAP_3	LTR	Novel	5824.4	1796.2	4028.2	260.7	385.2	238.1	611.7	58.6	323	1238.8	2708.3
Sj_Blaster_Grouper_27283_MAP_3	LTR	NONAUT-5_1p	5811.9	2531.1	3280.8	535.8	1270.5	715.1	720.3	826.5	776.4	453.7	513.6
Sj_Blaster_Grouper_28436_MAP_3	LTR	NONAUT-3_1p	5811.3	2571.6	3239.7	749.9	1350.8	611.6	637.9	403.6	435.4	806.5	815.6
Sj_Blaster_Piler_527.16_MAP_9	LTR	Novel	5795.5	3221.9	2573.6	1341.1	729	645.9	619.4	441.8	416.3	793.1	808.9
Sj_Blaster_Grouper_28639_MAP_3	LTR	SACI-7_2p	5794.8	3112	2682.8	1326.2	973.5	610.6	693.4	481.1	376.7	694.1	639.2
Sj_Blaster_Grouper_31229_MAP_3	LTR	SACI-7_2p	5792	3198.3	2593.7	1246.1	1362.8	1009.2	506.6	325.3	232.8	617.7	491.5
Sj_Blaster_Grouper_22955_MAP_3	LTR	Novel	5791.4	3125.6	2665.8	1461.2	810.3	633	756.3	542.8	568.8	488.6	530.4
Sj_Blaster_Grouper_32436_MAP_9	LTR	Novel	5780.9	4178.9	1602	384.8	220.8	625	209.4	337.1	54	2832	1117.8
Sj_Blaster_Grouper_33195_MAP_19	LTR	Novel	5765.4	2068.5	3696.9	805.1	2093	423.6	427.3	302.8	502.9	537	673.7
Sj_Blaster_Grouper_16171_MAP_10	LTR	Novel	5746.3	3426.3	2320	1322	603.7	701.6	626.4	780.7	621.9	622	468
Sj_Blaster_Grouper_28899_MAP_3	LTR	SACI-7_2p	5745.7	2638.1	3107.6	954.1	1227.3	635.1	600.9	463.4	596.2	585.5	683.2
Sj_Blaster_Grouper_31766_MAP_20	LTR	Novel	5726.3	3003.1	2723.2	1503.5	1226.6	650.2	860.7	407.2	311.5	442.2	324.4
Sj_Blaster_Grouper_16505_MAP_6	LTR	Novel	5708	3144.7	2563.3	1446.9	771.3	648.5	730.4	566.6	556.2	482.7	505.4
Sj_Blaster_Grouper_10106_MAP_7	LTR	Novel	5704.7	2129	3575.7	1104.6	1339.2	384.1	888.5	188.7	445.8	451.6	902.2
Sj_Blaster_Grouper_16724_MAP_14	LTR	Novel	5704.2	2126.9	3577.3	559.7	1451.9	554.3	775.5	574.7	765.1	438.2	584.8
Sj_Blaster_Grouper_28366_MAP_3	LTR	Novel	5702.5	2644.1	3058.4	1198.4	1514.3	830.1	668.5	300.2	416.8	315.4	458.8
Sj_Blaster_Grouper_18501_MAP_7	LTR	Novel	5696.9	2181.8	3515.1	1285.7	1343.8	349.2	1059.1	271.3	537	275.6	575.2
Sj_Blaster_Grouper_32993_MAP_15	LTR	Novel	5676.8	1700.1	3976.7	633	1677.3	330.8	640.7	125.1	415.5	611.2	1243.2
Sj_Blaster_Grouper_17371_MAP_12	LTR	Novel	5675.1	2185.2	3489.9	1286.2	1325.7	350.3	1054.4	271.8	536.3	276.9	573.5
Sj_Blaster_Grouper_27576_MAP_4	LTR	Novel	5670.7	2693.1	2977.6	984.1	1180.4	645.4	576.7	449.4	557	614.2	663.5
Sj_Blaster_Grouper_20874_MAP_12	LTR	Novel	5667	3126.4	2540.6	1312.7	682.2	653.8	753.7	601.6	562	558.3	542.7
Sj_Blaster_Grouper_22123_MAP_3	LTR	Novel	5665.2	3095	2570.2	1386.4	783	639.9	729.9	544.8	546.2	523.9	511.1
Sj_Blaster_Grouper_19553_MAP_4	LTR	Novel	5660.8	3307.8	2353	1398.4	600.4	744.8	710.7	602.1	529.1	562.5	512.8
Sj_Blaster_Recon_7298_MAP_7	LTR	Novel	5655.8	1781.9	3873.9	253.3	389.1	233.3	563	58.6	309.3	1236.7	2612.5
Sj_Blaster_Grouper_24592_MAP_7	LTR	Novel	5646	2616.9	3029.1	1181.6	1496	844.5	665.9	279.6	419.8	311.2	447.4
Sj_Blaster_Grouper_27957_MAP_3	LTR	NONAUT-3_1p	5595.7	2500.2	3095.5	755.2	1277.6	574	632	412.2	417.8	758.8	768.1
Sj_Blaster_Grouper_13468_MAP_8	LTR	Novel	5577.2	2021.3	3555.9	571.6	1444.2	555.8	774.8	498.5	788.8	395.4	548.1
Sj_Blaster_Grouper_32875_MAP_15	LTR	Novel	5557.7	1676.4	3881.3	626.2	1625.6	324.6	636.9	124.7	403.8	600.9	1215
Sj_Blaster_Grouper_26856_MAP_8	LTR	NONAUT-3_1p	5534	2377.2	3156.8	692.8	1293	557.8	623.1	382.6	438.2	744	802.5
Sj_Blaster_Grouper_30910_MAP_5	LTR	GYPSY21_AGp	5533.9	3024.8	2509.1	1451	1177	684	725.1	420.9	279.5	468.9	327.5
Sj_Blaster_Grouper_24804_MAP_16	LTR	Novel	5532.9	2919.8	2613.1	1466.8	1193	637.3	827	390.4	283.4	425.3	309.7
Sj_Blaster_Grouper_24840_MAP_7	LTR	Novel	5525.7	2125.6	3400.1	1248.3	1304.6	345.4	1024.7	263	512.2	268.9	558.6
Sj_Blaster_Grouper_27434_MAP_3	LTR	NONAUT-3_1p	5524.7	3282.9	2241.8	1326.9	657	655.6	535.2	465.6	354.8	834.8	694.8
Sj_Blaster_Grouper_10989_MAP_20	LTR	Novel	5496.8	4392	1104.8	2653.9	641	827.8	276.5	351.6	65	558.7	122.3
Sj_Blaster_Grouper_32534_MAP_20	LTR	Novel	5494.5	2500.8	2993.7	721.9	1284.1	600.1	598	403.9	388.8	774.9	722.8
Sj_Blaster_Grouper_23982_MAP_3	LTR	Novel	5492.2	1578	3914.2	341.2	1561.2	474.8	878.1	419.5	819.5	342.5	655.4
Sj_Blaster_Grouper_27137_MAP_5	LTR	Novel	5488.5	3034	2454.5	1533.3	1061.4	661.8	804.1	399.8	288.9	439.1	300.1
Sj_Blaster_Grouper_15202_MAP_5	LTR	Novel	5471.5	3464.5	2007	1394	562.2	766.3	532.6	764.1	510.6	540.1	401.6
Sj_Blaster_Grouper_23948_MAP_3	LTR	Novel	5462.7	2593.8	2868.9	1153.5	1436.7	833.6	628.5	296.6	384.4	310.1	419.3
Sj_Blaster_Grouper_31452_MAP_4	LTR	Novel	5458.1	3878.4	1579.7	359.8	215.2	591.8	206.3	306.3	52.2	2620.5	1106
Sj_Blaster_Grouper_28569_MAP_3	LTR	Novel	5457.1	2567	2890.1	913.9	1118.5	625.9	562.7	469.9	578.9	557.3	630
Sj_Blaster_Grouper_33197_MAP_15	LTR	Novel	5446.4	1621.5	3824.9	620.4	1618.6	306.8	645.1	135.8	428.7	558.5	1132.5
Sj_Blaster_Grouper_31141_MAP_3	LTR	NONAUT-3_1p	5435.1	2470.8	2964.3	731.1	1223.4	570.6	583.2	398.6	411	770.5	746.7
Sj_Blaster_Grouper_12233_MAP_4	LTR	Novel	5428.9	3353.3	2075.6	1357.3	553.9	740.9	578.5	730.8	529.9	524.3	413.3
Sj_Blaster_Grouper_18420_MAP_6	LTR	Novel	5423.8	3326.3	2097.5	1393.5	549.4	754.4	643.6	615.6	462.2	562.8	442.3
Sj_Blaster_Grouper_28289_MAP_4	LTR	Novel	5408.4	2573.8	2834.6	1102.1	1539.8	725	548	245.8	255	500.9	491.8
Sj_Blaster_Grouper_26317_MAP_6	LTR	Novel	5399.9	3299.7	2100.2	1276.1	1232.9	993.1	340.4	493	261.5	537.5	265.4
Sj_Blaster_Grouper_33210_MAP_6	LTR	Novel	5397.9	3577.1	1820.8	374.6	261.2	508	240.7	289.2	59.7	2405.3	1259.2
Sj_Blaster_Grouper_21564_MAP_13	LTR	Novel	5393.6	3265.6	2128	1329.5	575.7	678	644.3	627.6	453.4	630.5	454.6
Sj_Blaster_Recon_3200_MAP_10	LTR	BN000804_1p	5393.1	3498.2	1894.9	1268.9	693.7	841	452.5	450.6	298	937.7	450.7
Sj_Blaster_Grouper_29012_MAP_5	LTR	Novel	5391.3	2926.6	2464.7	1169.9	1267.8	846.4	489.5	301.3	230	609	477.4
Sj_Blaster_Grouper_29256_MAP_16	LTR	Novel	5384.9	3523	1861.9	1574.6	604.2	527.9	345	447	256.2	973.5	656.5
Sj_Blaster_Grouper_28475_MAP_3	LTR	Novel	5377.9	1741.7	3636.2	244.6	376	228.9	538.9	58.2	294.3	1210	2427
Sj_Blaster_Grouper_29644_MAP_3	LTR	Novel	5371.1	3015.6	2355.5	1444.9	1130.4	688.4	676.6	420.7	264.4	461.6	284.1
Sj_Blaster_Grouper_29643_MAP_4	LTR	Novel	5368.4	2986.3	2382.1	1431.7	1128.7	680.1	689.2	417.9	268.1	456.6	296.1
Sj_Blaster_Grouper_33932_MAP_16	LTR	Novel	5361.5	3563.4	1798.1	383.6	249.8	510.6	234	288.9	60.7	2380.3	1253.6
Sj_Blaster_Recon_674_MAP_20	LTR	BN000804_1p	5356	1906.4	3449.6	697.7	1261	460.4	820.7	298.4	448.9	449.9	919
Sj_Blaster_Grouper_25146_MAP_5	LTR	Novel	5348	2850	2498	1100.7	895.8	558.2	611.2	564.5	442.8	626.6	548.2
Sj_Blaster_Grouper_30102_MAP_5	LTR	Novel	5345.9	2365	2980.9	1134	1431	679.3	676.8	266.3	416.2	285.4	456.9
Sj_Blaster_Grouper_30326_MAP_20	LTR	GYPSY48_AG2p	5345.3	2742.5	2602.8	1137.3	1302.3	806.3	564.3	260.2	240.5	538.7	495.7
Sj_Blaster_Grouper_30224_MAP_6	LTR	Novel	5324.7	2980.7	2344	1429.4	1121.6	676.2	676.7	417.6	262.7	457.5	283
Sj_Blaster_Grouper_27772_MAP_3	LTR	Novel	5321.8	3755.8	1566	353.8	221.3	557.8	206.5	302.7	51.6	2541.5	1086.6
Sj_Blaster_Grouper_31956_MAP_8	LTR	Novel	5321.3	3649.4	1671.9	358.9	233.5	549.2	218.2	292.9	55.5	2448.4	1164.7
Sj_Blaster_Grouper_27995_MAP_3	LTR	Novel	5301	3111.3	2189.7	1181.5	549.1	645.1	581.7	769.2	621.7	515.5	437.2
Sj_Blaster_Grouper_29380_MAP_20	LTR	Novel	5297.4	2745.7	2551.7	1170.8	1264.9	798.7	573.4	254	239.2	522.2	474.2
Sj_Blaster_Grouper_30072_MAP_3	LTR	Novel	5296.1	2322.2	2973.9	1113	1431	668.1	672.1	262.6	417.6	278.5	453.2
Sj_Blaster_Grouper_27418_MAP_6	LTR	Novel	5237.6	2318.8	2918.8	1110.3	1398.6	667.5	660.6	261.8	413.1	279.2	446.5
Sj_Blaster_Grouper_29790_MAP_13	LTR	Novel	5231.7	2544.4	2687.3	1271.4	1100.7	551.8	798.8	234.6	258.9	486.6	528.9
Sj_Blaster_Grouper_30079_MAP_6	LTR	Novel	5230.8	3374.9	1855.9	370.4	259.1	502.5	241.6	275.1	61.8	2226.9	1293.4
Sj_Blaster_Grouper_14708_MAP_10	LTR	Novel	5215.2	3213.2	2002	1226.2	1191.6	976.7	315	487.2	247.6	523.1	247.8
Sj_Blaster_Grouper_26785_MAP_3	LTR	Novel	5205.2	1638.2	3567	229.6	358.4	213.4	515.6	54.2	290.1	1141	2402.9
Sj_Blaster_Grouper_30097_MAP_3	LTR	Novel	5201.7	2913.1	2288.6	1408.2	1102.4	658.5	660.9	405.4	254.9	441	270.4
Sj_Blaster_Grouper_33192_MAP_14	LTR	Novel	5201.2	1790.8	3410.4	603.8	1471.9	314.7	537.7	236.8	428.1	635.5	972.7
Sj_Blaster_Grouper_25546_MAP_7	LTR	Novel	5200.8	2289.4	2911.4	1091.1	1378.8	662.7	670.4	260.4	414.1	275.2	448.1
Sj_Blaster_Grouper_29968_MAP_3	LTR	Novel	5193.7	3292.1	1901.6	1267.4	522.3	667.1	449.6	803.4	531.7	554.2	398
Sj_Blaster_Grouper_26556_MAP_3	LTR	Novel	5193.4	2392.3	2801.1	855.6	1086.9	564	540.8	413.7	539.1	559	634.3
Sj_Blaster_Grouper_26186_MAP_8	LTR	Novel	5191.4	1828.5	3362.9	255.9	370.9	238.9	487.5	61.3	277.4	1272.4	2227.1
Sj_Blaster_Grouper_28402_MAP_20	LTR	Novel	5189.1	2529.1	2660	1291.8	1094.4	543.1	789.7	230.7	255.4	463.5	520.5
Sj_Blaster_Grouper_27040_MAP_6	LTR	Novel	5184.6	2358.2	2826.4	861.5	1113.4	561.8	543.8	408.4	559.1	526.5	610.1
Sj_Blaster_Grouper_29308_MAP_4	LTR	Novel	5177.1	3222	1955.1	1235.3	1158.9	976.4	307.2	486.8	245.1	523.5	243.9
Sj_Blaster_Grouper_16844_MAP_8	LTR	Novel	5176.3	3222.1	1954.2	1235.4	1158.6	976.4	306.8	486.8	245	523.5	243.8
Sj_Blaster_Grouper_33696_MAP_4	LTR	Novel	5174.1	3687.1	1487	346.4	207.5	550.5	190.7	295.2	48.6	2495	1040.2
Sj_Blaster_Grouper_29255_MAP_4	LTR	Novel	5162.2	2991.4	2170.8	1139.6	482.5	646	658.1	706.5	574	499.3	456.2
Sj_Blaster_Grouper_25569_MAP_17	LTR	Novel	5161.5	2907.5	2254	1372.8	1062.9	673.9	661.7	413.1	255.9	447.7	273.5
Sj_Blaster_Grouper_22828_MAP_3	LTR	Novel	5157.2	3720.2	1437	337.9	201.8	555.8	187.8	299.9	47.2	2526.6	1000.2
Sj_Blaster_Grouper_23792_MAP_3	LTR	Novel	5146.5	1685.4	3461.1	242.6	357.3	223.3	498.5	56.3	280.2	1163.2	2325.1
Sj_Blaster_Grouper_28210_MAP_3	LTR	Novel	5142.5	2831	2311.5	1360.6	1119.7	647	666.3	394.4	255.7	429	269.8
Sj_Blaster_Grouper_29248_MAP_12	LTR	Novel	5139.8	2692.6	2447.2	1101.7	1242.3	777.5	539.8	266.9	221.9	546.5	443.2
Sj_Blaster_Piler_586.51_MAP_10	LTR	SACI-7_2p	5116.6	2629	2487.6	1081	1263.2	776	534.6	252	229.7	520	460.1
Sj_Blaster_Grouper_27288_MAP_19	LTR	Novel	5113.3	1495.4	3617.9	551.8	1460.9	301.2	618.5	127.8	429.2	514.6	1109.3
Sj_Blaster_Grouper_8549_MAP_20	LTR	Novel	5111.1	4146.5	964.6	2528.8	556.6	760.7	244.4	331.1	56.4	525.9	107.2
Sj_Blaster_Grouper_27299_MAP_4	LTR	Novel	5106.2	2072.5	3033.7	611	1264.3	492.9	602.1	326.1	420.9	642.5	746.4
Sj_Blaster_Grouper_12059_MAP_3	LTR	Novel	5099.5	3068.2	2031.3	1181.2	1193.1	913.8	329.4	470.6	254.1	502.6	254.7
Sj_Blaster_Grouper_26654_MAP_18	LTR	Novel	5087.7	1536.6	3551.1	213	338.3	202.5	549	51	291.2	1070.1	2372.6
Sj_Blaster_Grouper_29206_MAP_10	LTR	Novel	5087.1	2533.5	2553.6	1267.5	1053	550.8	756	235.9	249	479.3	495.6
Sj_Blaster_Grouper_33508_MAP_20	LTR	Gypsy1-I_AP_1p	5078.7	2574.9	2503.8	1046.4	1250.5	769.3	541.8	249.7	232.2	509.5	479.3
Sj_Blaster_Grouper_30201_MAP_10	LTR	Novel	5073.9	2838.4	2235.5	1363.9	1061.1	642.2	655.1	405.5	249.7	426.8	269.6
Sj_Blaster_Grouper_35034_MAP_7	LTR	Novel	5072.8	3577.5	1495.3	343.2	207.2	534.5	195.8	290.4	50.3	2409.4	1042
Sj_Blaster_Grouper_30637_MAP_3	LTR	NONAUT-5_1p	5063.5	3171.7	1891.8	1561.8	700.9	638.7	441.3	354.8	220.8	616.4	528.8
Sj_Blaster_Grouper_29384_MAP_6	LTR	Novel	5063.3	2402.1	2661.2	1175.3	1092.5	532.1	768.5	233.8	265.2	460.9	535
Sj_Blaster_Grouper_29460_MAP_20	LTR	Novel	5063.1	2540.7	2522.4	1041.4	1264	750.8	548	246	233	502.5	477.4
Sj_Blaster_Grouper_14528_MAP_3	LTR	Novel	5061.7	2982.2	2079.5	1191.5	745.4	704	524.3	374.7	317	712	492.8
Sj_Blaster_Grouper_15860_MAP_5	LTR	Novel	5050.3	3441.9	1608.4	1388.7	585.1	779.3	471.8	458.4	202.9	815.5	348.6
Sj_Blaster_Grouper_28911_MAP_4	LTR	Novel	5049.9	2141.8	2908.1	1040.3	1404.2	608.8	647.9	239.3	409.6	253.4	446.4
Sj_Blaster_Grouper_27875_MAP_20	LTR	Novel	5040.5	2630.3	2410.2	1093.7	1208.7	769.7	526.3	253.9	225.9	513	449.3
Sj_Blaster_Grouper_25679_MAP_4	LTR	Novel	5036.1	2119.4	2916.7	808.6	1157	505.2	561.6	347.2	549.6	458.4	648.5
Sj_Blaster_Grouper_15828_MAP_5	LTR	Novel	5027.9	1784.2	3243.7	403.2	1277.7	534.3	733.9	480.4	735.2	366.3	496.9
Sj_Blaster_Grouper_23964_MAP_5	LTR	Novel	5026.8	2122.5	2904.3	621.8	1232.9	493.7	557.1	343.7	388.3	663.3	726
Sj_Blaster_Grouper_32305_MAP_20	LTR	Novel	5024.5	2129.7	2894.8	635.4	1235.3	495.7	576	337.4	382.6	661.2	700.9
Sj_Blaster_Grouper_33331_MAP_10	LTR	Novel	5021.5	2626.7	2394.8	1064.8	1192.4	756	514.3	266.9	232.2	539	455.9
Sj_Blaster_Grouper_29723_MAP_5	LTR	Novel	5020.6	2538.6	2482	1027.4	1218.1	755.7	544.5	249.1	235.4	506.4	484
Sj_Blaster_Grouper_25828_MAP_3	LTR	Novel	5018.9	2046.4	2972.5	591.6	1222.6	482.7	588.6	323.5	408.3	648.6	753
Sj_Blaster_Grouper_29621_MAP_3	LTR	Novel	5011.8	2774.6	2237.2	1212.2	639.5	555	549.6	363.5	355.1	643.9	693
Sj_Blaster_Grouper_31947_MAP_3	LTR	Novel	4997.5	2334	2663.5	1176	1085.2	533.2	767.3	214.3	266.9	410.5	544.1
Sj_Blaster_Grouper_26079_MAP_3	LTR	Novel	4992.7	2464.5	2528.2	1058.4	744.1	428.1	696.2	518.6	588.4	459.4	499.5
Sj_Blaster_Grouper_30093_MAP_20	LTR	Novel	4988.8	2456.2	2532.6	1230.4	996.8	533	735.2	230.7	258.6	462.1	542
Sj_Blaster_Grouper_29616_MAP_20	LTR	Novel	4985.6	2596.9	2388.7	1058.6	1220.1	786.4	502.4	247.4	220	504.5	446.2
Sj_Blaster_Grouper_33786_MAP_5	LTR	Novel	4980.2	3328	1652.2	348.8	230.6	493	216.6	271.8	55.5	2214.4	1149.5
Sj_Blaster_Grouper_32579_MAP_20	LTR	Novel	4972.3	1832.6	3139.7	633.3	1300.2	316.5	503.9	233.7	419.5	649.1	916.1
Sj_Blaster_Grouper_27830_MAP_12	LTR	Novel	4969.4	2573.8	2395.6	1041.8	1183.3	768.3	522.6	251.4	226.9	512.3	462.8
Sj_Blaster_Grouper_33699_MAP_8	LTR	Novel	4965.9	3073.4	1892.5	363.2	262.2	447.6	246.1	254.8	63	2007.8	1321.2
Sj_Blaster_Grouper_25706_MAP_3	LTR	Novel	4960.9	2285.6	2675.3	808.9	1029.2	540.7	521.6	404.1	530	531.9	594.5
Sj_Blaster_Grouper_24616_MAP_4	LTR	Novel	4960.8	2891	2069.8	1241.7	636.2	582.3	548	548.2	459.4	518.8	426.2
Sj_Blaster_Grouper_17123_MAP_4	LTR	Novel	4958.9	2760.8	2198.1	1266.8	597.9	594.4	665.9	483.5	484.6	416.1	449.7
Sj_Blaster_Grouper_31271_MAP_17	LTR	Novel	4958.4	2411.9	2546.5	1202.8	1048.2	525.9	752.2	225.7	244.3	457.5	501.8
Sj_Blaster_Grouper_29990_MAP_3	LTR	Novel	4953.1	2823.4	2129.7	1206.2	603.9	571.9	507.1	372.9	348.6	672.4	670.1
Sj_Blaster_Grouper_27624_MAP_6	LTR	Novel	4948.3	2716.1	2232.2	1288	1079.5	630.1	640.8	388.2	248.7	409.8	263.2
Sj_Blaster_Grouper_29926_MAP_3	LTR	SACI-7_2p	4940.8	2851.4	2089.4	1143.5	1056.3	845.9	420.3	287.9	200	574.1	412.8
Sj_Blaster_Grouper_28687_MAP_3	LTR	Novel	4934.9	2565.3	2369.6	1246.7	985.8	571.7	674.8	249	229	497.9	480
Sj_Blaster_Grouper_34753_MAP_3	LTR	Novel	4930.3	3371.4	1558.9	347.1	223.4	456.5	203.5	265.2	51.4	2302.6	1080.6
Sj_Blaster_Grouper_25482_MAP_5	LTR	Novel	4925.1	2225	2700.1	1069.1	1314.5	635.7	607.7	253.2	374.3	267	403.6
Sj_Blaster_Grouper_33216_MAP_4	LTR	Novel	4925	3223.7	1701.3	355.3	232	471	217.3	256.1	56.7	2141.3	1195.3
Sj_Blaster_Grouper_28782_MAP_20	LTR	Novel	4912.7	2378.1	2534.6	1191.4	1034.3	516.4	753	226.2	248.7	444.1	498.6
Sj_Blaster_Grouper_23667_MAP_20	LTR	Novel	4898.9	2528.9	2370	1032.8	1163	751.4	522.7	247.7	225.7	497	458.6
Sj_Blaster_Grouper_28414_MAP_20	LTR	Novel	4895	2413.5	2481.5	1231	1012.5	513.2	742.3	221.3	241.3	448	485.4
Sj_Blaster_Grouper_28726_MAP_20	LTR	Novel	4892	2848.6	2043.4	1228.5	587.9	557.5	486.2	380.8	331.7	681.8	637.6
Sj_Blaster_Grouper_24640_MAP_3	LTR	Novel	4891.9	1740.3	3151.6	247.9	348.5	225.2	430	56.5	248.8	1210.7	2124.3
Sj_Blaster_Grouper_23816_MAP_7	LTR	Novel	4885.8	1843.1	3042.7	254.1	359.3	237.6	441.3	61.2	249.5	1290.2	1992.6
Sj_Blaster_Grouper_24620_MAP_4	LTR	Novel	4878.4	2604.1	2274.3	1028.4	842.8	500.8	533	496.8	389.2	578.1	509.3
Sj_Blaster_Grouper_23950_MAP_20	LTR	Gypsy1-I_AP_1p	4875.6	2679.4	2196.2	1124.5	1127.8	770	477.7	258.9	179.7	526	411
Sj_Blaster_Grouper_24615_MAP_7	LTR	Novel	4870.6	2108.7	2761.9	599.1	1119.8	498.5	582.3	346.9	392.6	664.2	667.2
Sj_Blaster_Grouper_29606_MAP_10	LTR	Novel	4851.5	2414.6	2436.9	1204.7	970	518.6	724.9	227.1	240	464.2	502
Sj_Blaster_Grouper_16247_MAP_3	LTR	Novel	4848.6	2069	2779.6	562.9	1155.5	633.4	599.4	451.1	539.6	421.6	485.1
Sj_Blaster_Grouper_29591_MAP_3	LTR	SACI-7_2p	4842.7	2018.2	2824.5	706.6	1113.1	482.8	542.9	340.2	522	488.6	646.5
Sj_Blaster_Grouper_34921_MAP_3	LTR	SACI-5_1p	4841.2	2511	2330.2	1062.4	807.3	399.5	461.8	209.7	289.9	839.4	771.2
Sj_Blaster_Grouper_29323_MAP_7	LTR	Novel	4837.1	2078.5	2758.6	718.2	1200.2	506.8	589.5	279.5	342.3	574	626.6
Sj_Blaster_Grouper_25475_MAP_20	LTR	Novel	4834.3	2480.3	2354	997.1	1208.1	730.1	495.4	249.8	219.3	503.3	431.2
Sj_Blaster_Grouper_24140_MAP_5	LTR	Novel	4822.6	2648.7	2173.9	1060.6	809.8	504.2	523.7	522.6	386.5	561.3	453.9
Sj_Blaster_Grouper_27907_MAP_4	LTR	Novel	4813.9	1768.9	3045	562.6	1307.1	433.7	576.9	425.8	617.7	346.8	543.3
Sj_Blaster_Grouper_27093_MAP_18	LTR	Novel	4809.9	4781.8	28.1	1106.4	15.8	1915.1	8.5	1311	0.8	449.3	3
Sj_Blaster_Grouper_12909_MAP_3	LTR	Novel	4797.6	2429.9	2367.7	1127.4	726	467.5	669.4	430	509.4	405	462.9
Sj_Blaster_Grouper_28670_MAP_18	LTR	Novel	4792.3	2157.4	2634.9	626.1	1278.4	644.6	502.8	455.4	516	431.3	337.7
Sj_Blaster_Grouper_28894_MAP_5	LTR	Novel	4790.2	2203.2	2587	807.1	1029.2	536.4	490.2	396	516.2	463.7	551.4
Sj_Blaster_Grouper_25758_MAP_3	LTR	NONAUT-3_1p	4786.4	2594.3	2192.1	1056.8	636.9	534.2	515.7	363	350.4	640.3	689.1
Sj_Blaster_Grouper_28074_MAP_3	LTR	SACI-7_2p	4774.4	2561.3	2213.1	1100.4	841.7	547.2	581.1	362.4	279.2	551.3	511.1
Sj_Blaster_Grouper_31282_MAP_3	LTR	Novel	4768.4	2469.7	2298.7	1027.8	1147.4	738.6	494.2	241.4	219.3	461.9	437.8
Sj_Blaster_Grouper_23156_MAP_7	LTR	Novel	4755.2	1726.1	3029.1	241.5	344	225.9	438.6	57.8	249.6	1200.9	1996.9
Sj_Blaster_Grouper_30040_MAP_20	LTR	Novel	4745.9	2439.2	2306.7	997.5	1205.2	726.2	482.3	237.6	206.7	477.9	412.5
Sj_Blaster_Grouper_20856_MAP_20	LTR	Novel	4733.8	2070.1	2663.7	587.2	1097.3	480.9	539.6	347.8	368.5	654.2	658.3
Sj_Blaster_Piler_746.16_MAP_3	LTR	Novel	4731.2	1909.3	2821.9	615.2	1213.8	480.9	604.3	261.5	364.5	551.7	639.3
Sj_Blaster_Grouper_25309_MAP_20	LTR	Novel	4729.7	2447.2	2282.5	979.2	1127.8	713.2	496	248.9	224.1	505.9	434.6
Sj_Blaster_Grouper_31683_MAP_3	LTR	Novel	4718.1	2236.2	2481.9	1092.3	1017	492.2	743.2	219.4	238.5	432.3	483.2
Sj_Blaster_Grouper_29776_MAP_4	LTR	Novel	4714.8	2263.8	2451	928.7	1268.7	655.7	524.1	225.5	216.3	453.9	441.9
Sj_Blaster_Grouper_15912_MAP_5	LTR	Novel	4711.7	2347.6	2364.1	1116.7	707.9	499	672.6	399.1	508.7	332.8	474.9
Sj_Blaster_Grouper_11276_MAP_20	LTR	Novel	4710.6	2220	2490.6	655	1159.6	641	522.6	480.4	446.5	443.6	361.9
Sj_Blaster_Grouper_29066_MAP_10	LTR	Novel	4701.2	2844.1	1857.1	1209.5	560.3	568.2	423.3	379	292.6	687.4	580.9
Sj_Blaster_Grouper_18583_MAP_19	LTR	Novel	4689.9	1522	3167.9	312.1	1276.3	434.5	702.7	450.6	699.2	324.8	489.7
Sj_Blaster_Grouper_29439_MAP_20	LTR	Novel	4688.8	2737.6	1951.2	1179.6	581.9	535	466.6	363.3	312.7	659.7	590
Sj_Blaster_Grouper_29808_MAP_3	LTR	Novel	4683.3	2366.7	2316.6	964.5	1151.3	714.9	508.2	233.3	217	454	440.1
Sj_Blaster_Grouper_27532_MAP_5	LTR	Novel	4677.7	2403.9	2273.8	961.9	1160	709.6	475	244	216.3	488.4	422.5
Sj_Blaster_Grouper_32329_MAP_3	LTR	Novel	4677	3443.4	1233.6	317	174.1	496.2	158.4	276.6	41.3	2353.6	859.8
Sj_Blaster_Grouper_32545_MAP_20	LTR	Novel	4675.5	1945.1	2730.4	542.5	1151.1	481.1	548.3	309.6	370.9	611.9	660.1
Sj_Blaster_Grouper_13549_MAP_6	LTR	Novel	4674.8	3371.7	1303.1	1469	506.6	953.4	315.8	429.8	201.3	519.5	279.4
Sj_Blaster_Grouper_23426_MAP_11	LTR	Novel	4673.5	2137.8	2535.7	1027.3	1226	614.1	577.3	244	356	252.4	376.4
Sj_Blaster_Grouper_24557_MAP_3	LTR	Novel	4672.4	2345.2	2327.2	1065.6	679.9	484.9	661.7	429.6	504.8	365.1	480.8
Sj_Blaster_Grouper_27843_MAP_17	LTR	Novel	4671.3	2260.8	2410.5	1124	975.2	484.4	722.1	217.4	237.1	435	476.1
Sj_Blaster_Grouper_31583_MAP_10	LTR	Novel	4668	2397.2	2270.8	1190.3	940.6	516.2	653	230.8	216.7	459.9	460.5
Sj_Blaster_Recon_124_MAP_20	LTR	NONAUT-3_1p	4665.1	1702.1	2963	523.4	1264.5	434.3	638.4	262.1	385.5	482.3	674.6
Sj_Blaster_Grouper_27332_MAP_17	LTR	Novel	4646.6	2727.1	1919.5	1171.5	573.7	534.4	440.3	360.8	301.8	660.4	603.7
Sj_Blaster_Grouper_28623_MAP_3	LTR	Novel	4638.2	2739.3	1898.9	1255.7	483.7	590.4	605.7	487.2	408.5	406	401
Sj_Blaster_Grouper_26514_MAP_3	LTR	Novel	4637.8	3219.8	1418	310.2	210.9	428.3	188.3	254.6	45.2	2226.7	973.6
Sj_Blaster_Grouper_34023_MAP_4	LTR	Novel	4637.2	1973.6	2663.6	663	1162.5	484.8	545.2	270.9	342.4	554.9	613.5
Sj_Blaster_Grouper_30246_MAP_7	LTR	Novel	4630.9	2414.2	2216.7	1136	1066.6	564.4	633.1	339.2	251.9	374.6	265.1
Sj_Blaster_Grouper_29666_MAP_3	LTR	Novel	4630.6	2623.3	2007.3	1129	625.2	518.9	492	339	287.7	636.4	602.4
Sj_Blaster_Grouper_33212_MAP_20	LTR	Novel	4626.6	2315.1	2311.5	923	1199.6	710	481.9	230.1	207.9	452	422.1
Sj_Blaster_Grouper_30017_MAP_8	LTR	Novel	4623.7	2257.3	2366.4	1143.5	916.6	473.4	722.2	211.7	236.6	428.7	491
Sj_Blaster_Grouper_28657_MAP_4	LTR	Novel	4619.2	2634.8	1984.4	1152.8	573.8	512.4	467.6	344.7	320.6	624.9	622.4
Sj_Blaster_Grouper_30546_MAP_4	LTR	Novel	4616.2	2448.7	2167.5	1150.6	906.7	560.3	708.4	334.2	241.7	403.6	310.7
Sj_Blaster_Grouper_29511_MAP_11	LTR	NONAUT-5_1p	4616.1	1911.8	2704.3	636.4	1190	470.4	583.5	262.2	330.4	542.8	600.4
Sj_Blaster_Grouper_28804_MAP_3	LTR	Novel	4615.7	2698.7	1917	1386.6	825.1	548.3	480.6	270	192.6	493.8	418.7
Sj_Blaster_Grouper_22325_MAP_4	LTR	Novel	4613.9	1864.5	2749.4	532.4	1182.1	430	523.5	309.4	365.8	592.7	678
Sj_Blaster_Grouper_28582_MAP_5	LTR	Novel	4609.2	2397.6	2211.6	1210.4	849.9	515.9	631.9	225.6	240.1	445.7	489.7
Sj_Blaster_Grouper_28626_MAP_20	LTR	Novel	4605.5	2406.9	2198.6	966	1084.2	732.4	484.6	235.7	214.4	472.8	415.4
Sj_Blaster_Grouper_26200_MAP_20	LTR	Novel	4604.2	1426.2	3178	519.3	1211	284.8	570.9	118.7	413.2	503.4	982.9
Sj_Blaster_Grouper_13657_MAP_6	LTR	Novel	4602.9	1501.7	3101.2	302.5	1254	430.8	685.4	447.3	687.2	321.1	474.6
Sj_Blaster_Grouper_5235_MAP_3	LTR	Novel	4597	3865.6	731.4	2384.6	419	687.7	186.2	307.9	44.6	485.4	81.6
Sj_Blaster_Grouper_26364_MAP_3	LTR	BN000804_1p	4585.3	2840.2	1745.1	1105.2	650.1	674.4	420.6	362.1	277.3	698.5	397.1
Sj_Blaster_Grouper_27777_MAP_3	LTR	Novel	4579.4	2803.3	1776.1	1295.5	456.5	589.7	564.4	500.2	385.1	417.9	370.1
Sj_Blaster_Grouper_27662_MAP_20	LTR	GYPSY48_AG2p	4570.8	2195.3	2375.5	1142.7	956.1	463.4	719.5	199.2	231.8	390	468.1
Sj_Blaster_Grouper_25489_MAP_3	LTR	Novel	4567	2176.2	2390.8	1035	1156.1	636.2	512.3	244.8	363.9	260.2	358.5
Sj_Blaster_Piler_113.16_MAP_5	LTR	Novel	4565.3	2635.7	1929.6	1067.9	546.3	547.7	448.8	371.3	328.2	648.8	606.3
Sj_Blaster_Grouper_31540_MAP_9	LTR	Novel	4563.7	2612.3	1951.4	1138.6	663.4	527.4	480.6	337.2	263.7	609.1	543.7
Sj_Blaster_Grouper_28128_MAP_4	LTR	Novel	4560.2	2062.1	2498.1	746.8	969.8	489.6	485.7	353.9	475	471.8	567.6
Sj_Blaster_Grouper_22289_MAP_4	LTR	Novel	4555.3	2056.7	2498.6	693.4	970.7	506.4	511.4	358.7	460.8	498.2	555.7
Sj_Blaster_Grouper_30080_MAP_3	LTR	Novel	4553.9	2328.5	2225.4	1173.3	939.3	519.4	585.4	218.2	222.4	417.6	478.3
Sj_Blaster_Grouper_27072_MAP_6	LTR	Novel	4550.3	2106.3	2444	734.6	960.5	506	498.1	359.1	434.7	506.6	550.7
Sj_Blaster_Grouper_11423_MAP_5	LTR	Novel	4548.5	1697.3	2851.2	395.4	1180.9	509	613.5	444.3	640.8	348.6	416
Sj_Blaster_Grouper_29378_MAP_8	LTR	Novel	4544.6	3258.8	1285.8	1401.2	439.1	490.4	255.7	372.6	165.2	994.6	425.8
Sj_Blaster_Grouper_30442_MAP_20	LTR	Novel	4542.1	1822.2	2719.9	942.5	1131.4	357.4	772.1	150.2	267.7	372.1	548.7
Sj_Blaster_Grouper_24411_MAP_3	LTR	Novel	4540.5	2604	1936.5	1027.4	733.5	498.6	449	517.5	339.7	560.5	414.3
Sj_Blaster_Recon_366_MAP_20	LTR	SACI-5_1p	4539.8	3286.2	1253.6	1354.3	504.2	532.3	224.5	394.8	133.4	1004.8	391.5
Sj_Blaster_Grouper_28348_MAP_11	LTR	Novel	4536.2	2356.5	2179.7	954.9	1077	719.7	474.3	227.4	207.8	454.5	420.6
Sj_Blaster_Grouper_28635_MAP_5	LTR	Novel	4526.9	2003.6	2523.3	757.6	999.6	468.9	476.6	349.6	505.7	427.5	541.4
Sj_Blaster_Grouper_34331_MAP_3	LTR	SACI-7_2p	4525	2027.4	2497.6	721	1205	620.7	590.4	225.2	264.4	460.5	437.8
Sj_Blaster_Grouper_30724_MAP_3	LTR	Novel	4520.2	2542.9	1977.3	1032.2	558.6	537.3	463	352.4	330.4	621	625.3
Sj_Blaster_Grouper_32032_MAP_7	LTR	Novel	4515.5	2208.7	2306.8	1075.8	923.5	492.2	694	217	229	423.7	460.3
Sj_Blaster_Grouper_32033_MAP_3	LTR	GYPSY2_AGp	4515.1	2206	2309.1	1130.6	1004.8	433.6	605.8	207	217	434.8	481.5
Sj_Blaster_Grouper_34332_MAP_4	LTR	GYPSY2_AGp	4513.1	2427.6	2085.5	985.3	1058.6	728.7	459.4	237.1	169.8	476.5	397.7
Sj_Blaster_Grouper_24739_MAP_4	LTR	Novel	4508.7	1781.6	2727.1	535.8	1149.5	417.1	541	279.2	379.1	549.5	657.5
Sj_Blaster_Grouper_12008_MAP_19	LTR	Novel	4495.3	3129.2	1366.1	1261.2	299.4	696.1	396.8	689.9	385.8	482	284.1
Sj_Blaster_Grouper_28349_MAP_20	LTR	Novel	4493.4	2442.1	2051.3	1004.4	995.8	728.3	464.9	234.1	201.4	475.3	389.2
Sj_Blaster_Grouper_31279_MAP_3	LTR	Novel	4488	2195.6	2292.4	1065.4	886.9	484.3	675.6	217.9	244	428	485.9
Sj_Blaster_Grouper_29000_MAP_3	LTR	Novel	4486.5	2231.8	2254.7	852.1	1069.7	646.9	508.4	240.7	229.8	492.1	446.8
Sj_Blaster_Piler_541.51_MAP_5	LTR	SACI-7_2p	4483.8	2265	2218.8	1158	963	490.5	604.1	207.9	205.9	408.6	445.8
Sj_Blaster_Grouper_29265_MAP_20	LTR	Novel	4482.5	2170.9	2311.6	837.9	1162.3	647.6	502.8	224.2	215.6	461.2	430.9
Sj_Blaster_Grouper_24237_MAP_3	LTR	Novel	4477.5	2387.4	2090.1	1074.2	1129	765.9	418.5	271	266.1	276.3	276.5
Sj_Blaster_Grouper_27451_MAP_20	LTR	Novel	4472.8	1832.4	2640.4	558.8	1159.1	430	519	284.5	341	559.1	621.3
Sj_Blaster_Grouper_22857_MAP_3	LTR	Novel	4471.5	3258.7	1212.8	290.7	169.5	496.9	160.4	256.2	40.6	2214.9	842.3
Sj_Blaster_Grouper_27447_MAP_10	LTR	Novel	4463.1	2074.7	2388.4	990.9	942.9	457.8	713.8	214.6	240.2	411.4	491.5
Sj_Blaster_Grouper_32588_MAP_3	LTR	Novel	4460.1	2170.5	2289.6	835.2	1145	652.2	498	222.3	215.5	460.8	431.1
Sj_Blaster_Grouper_27187_MAP_4	LTR	Novel	4459.2	2133.6	2325.6	864.4	1217.8	623.1	484.9	215.7	209.5	430.4	413.4
Sj_Blaster_Grouper_24121_MAP_3	LTR	Novel	4455.6	2553.7	1901.9	1121.8	548.1	506.3	456	327.5	309.9	598.1	587.9
Sj_Blaster_Grouper_25796_MAP_3	LTR	Novel	4453.8	2057.7	2396.1	1041.8	950.8	441.2	743.8	191.5	238	383.2	463.5
Sj_Blaster_Grouper_27839_MAP_4	LTR	SACI-7_2p	4452.3	2160.8	2291.5	772.9	905.4	526.3	456.7	359	419.3	502.6	510.1
Sj_Blaster_Grouper_23373_MAP_7	LTR	Novel	4450.3	1715.4	2734.9	237.9	330.8	222.6	392.8	57.5	226.4	1197.4	1784.9
Sj_Blaster_Grouper_26722_MAP_4	LTR	Novel	4449.1	1797.6	2651.5	518	1153	419.3	516	294	350.4	566.3	632.1
Sj_Blaster_Grouper_31168_MAP_20	LTR	Novel	4438.8	1845.6	2593.2	969.4	1088.8	362.2	757.5	145.2	246.6	368.8	500.3
Sj_Blaster_Grouper_26679_MAP_5	LTR	Novel	4435.6	2685.9	1749.7	1163.8	526.9	534	406.9	351.7	269.8	636.4	546.1
Sj_Blaster_Grouper_5613_MAP_20	LTR	Novel	4431.4	1716.5	2714.9	463.8	1131.4	463.9	570.3	437.4	606.9	351.4	406.3
Sj_Blaster_Grouper_32727_MAP_15	LTR	Novel	4430.3	1493.1	2937.2	555.3	1308.8	281.3	493.8	104.5	231	552	903.6
Sj_Blaster_Grouper_23582_MAP_3	LTR	Novel	4429.9	3101.5	1328.4	300.5	187.6	462	176.1	248	44.8	2091	919.9
Sj_Blaster_Grouper_26407_MAP_8	LTR	Novel	4429.7	2149.3	2280.4	1111.3	938.7	459	691.5	199.6	219.4	379.4	430.8
Sj_Blaster_Grouper_21574_MAP_20	LTR	Novel	4429.4	2632.8	1796.6	1120.7	500.5	525	427.8	357.3	293.7	629.8	574.6
Sj_Blaster_Grouper_24860_MAP_3	LTR	Novel	4428.8	3100.8	1328	313.3	184.3	458.4	174	240	46.1	2089.1	923.6
Sj_Blaster_Grouper_26941_MAP_3	LTR	Novel	4423.7	3195.3	1228.4	294.7	170.9	470.2	160.9	255.9	41.2	2174.5	855.4
Sj_Blaster_Grouper_10405_MAP_13	LTR	Novel	4423	2690.3	1732.7	1330	477	498.2	535.6	512.2	373.5	349.9	346.6
Sj_Blaster_Grouper_27127_MAP_3	LTR	Novel	4420.5	2352	2068.5	1150.4	1020.8	524.1	593.3	325.9	227.1	351.6	227.3
Sj_Blaster_Grouper_23771_MAP_4	LTR	Novel	4419.4	2302.7	2116.7	994.9	845.9	496.7	553.4	307.3	237.1	503.8	480.3
Sj_Blaster_Grouper_27229_MAP_3	LTR	Novel	4412.1	2696.2	1715.9	1128.3	546.4	542.4	394	363.2	269	662.3	506.5
Sj_Blaster_Grouper_28910_MAP_4	LTR	Novel	4407.5	2086	2321.5	1071.3	990.2	458.1	679.7	170.9	216.2	385.7	435.4
Sj_Blaster_Grouper_34419_MAP_20	LTR	Novel	4406.1	2094.9	2311.2	1084.9	909.1	431.2	714.9	193.1	227.2	385.7	460
Sj_Blaster_Grouper_15286_MAP_5	LTR	Novel	4403	2749	1654	1104.6	620.3	654.8	401.4	338	263.4	651.6	368.9
Sj_Blaster_Grouper_26596_MAP_3	LTR	NONAUT-5_1p	4401.4	2502.8	1898.6	1010.8	537.3	533.7	461.5	359.8	305.3	598.5	594.5
Sj_Blaster_Grouper_29683_MAP_4	LTR	Novel	4399.4	1812.4	2587	529.9	1128.6	425.8	515.3	296.8	338.6	559.9	604.5
Sj_Blaster_Grouper_31214_MAP_12	LTR	Novel	4398.2	2487.7	1910.5	1103.4	667.1	496.8	456	312.9	259.1	574.6	528.3
Sj_Blaster_Grouper_30050_MAP_3	LTR	Novel	4396.9	2315.1	2081.8	1130.1	1021.6	518.9	602.8	321.4	229.4	344.7	228
Sj_Blaster_Grouper_13860_MAP_3	LTR	Novel	4396.1	3049.8	1346.3	1235.2	258.4	676.9	405.1	670.7	397.2	467	285.6
Sj_Blaster_Grouper_32839_MAP_3	LTR	Novel	4396	2954.6	1441.4	1042.1	544.6	536.6	254.3	403.2	141.3	972.7	501.2
Sj_Blaster_Grouper_27430_MAP_20	LTR	Novel	4394.5	2519.9	1874.6	1112.4	551.1	502.6	447.8	319.6	301.1	585.3	574.6
Sj_Blaster_Grouper_28634_MAP_7	LTR	Novel	4394.3	2230.5	2163.8	1138.6	885.5	466.6	646.5	206.7	205.8	418.6	426
Sj_Blaster_Grouper_31899_MAP_13	LTR	Novel	4394.2	2323.2	2071	1143.7	1021.7	513	594.4	320.7	227.2	345.8	227.7
Sj_Blaster_Grouper_27689_MAP_3	LTR	Novel	4391.9	2425.3	1966.6	1137.9	843.5	565.2	649.5	335.6	227.7	386.6	245.9
Sj_Blaster_Grouper_27904_MAP_20	LTR	Novel	4378.5	2682.5	1696	1162	509.6	519.7	388	356	272.5	644.8	525.9
Sj_Blaster_Grouper_27946_MAP_9	LTR	Novel	4367.4	2446.6	1920.8	970	482.7	526.7	566.6	508.2	454.5	441.7	417
Sj_Blaster_Grouper_28175_MAP_3	LTR	Novel	4365	2027.4	2337.6	538.9	963.9	631.5	519.3	423.8	442	433.2	412.4
Sj_Blaster_Piler_222.114_MAP_4	LTR	Novel	4364.9	1763.8	2601.1	462.8	1305.8	563.1	479.5	374.8	489.8	363.1	326
Sj_Blaster_Grouper_24856_MAP_3	LTR	Novel	4362.2	2541.9	1820.3	1139.1	528.8	489.9	433.5	320.2	293.6	592.7	564.4
Sj_Blaster_Grouper_25947_MAP_4	LTR	Novel	4360.5	1270.9	3089.6	177.3	291.2	167.5	462.1	42.2	248.9	883.9	2087.4
Sj_Blaster_Grouper_24002_MAP_17	LTR	Novel	4360.4	2101.1	2259.3	1065.9	877.5	444.4	673	204.5	234.2	386.3	474.6
Sj_Blaster_Recon_3_MAP_20	LTR	NONAUT-5_1p	4358	2079.5	2278.5	1014.9	1109.5	596.5	509.2	232.8	320.1	235.3	339.7
Sj_Blaster_Grouper_17649_MAP_3	LTR	Novel	4357.4	2016.8	2340.6	507.5	972.6	627.7	500.9	439.2	453.3	442.4	413.8
Sj_Blaster_Grouper_30348_MAP_3	LTR	Novel	4356.8	2180.2	2176.6	858.6	1153.7	663.3	451.2	219.9	193.4	438.4	378.3
Sj_Blaster_Grouper_28409_MAP_20	LTR	Novel	4355.1	1977.5	2377.6	1011.2	974.4	440.4	723	160.4	228.5	365.5	451.7
Sj_Blaster_Grouper_29801_MAP_3	LTR	NONAUT-5_1p	4352.9	2485.7	1867.2	1122.3	625.6	519.2	456.4	301.3	257.8	542.9	527.4
Sj_Blaster_Grouper_32745_MAP_19	LTR	Novel	4352	1457.8	2894.2	544.7	1034.1	284.4	527.9	121.7	395	507	937.2
Sj_Blaster_Grouper_26077_MAP_9	LTR	Novel	4350.2	2278.3	2071.9	980.4	849.6	485.9	517.1	329.7	240.9	482.3	464.3
Sj_Blaster_Grouper_29220_MAP_3	LTR	Novel	4347.2	2299.1	2048.1	926.4	1010.1	690.6	454	229.3	200.5	452.8	383.5
Sj_Blaster_Grouper_29270_MAP_11	LTR	Novel	4345.7	2524.9	1820.8	1063.3	955.2	732.8	359.2	242.4	141.5	486.4	364.9
Sj_Blaster_Grouper_26641_MAP_3	LTR	Novel	4344.3	2628.2	1716.1	1120.6	458.2	532.3	429.3	353.5	275.9	621.8	552.7
Sj_Blaster_Grouper_28527_MAP_3	LTR	BN000804_1p	4343.1	1128	3215.1	354.4	1190.9	311.4	783.6	171.8	422.1	290.4	818.5
Sj_Blaster_Grouper_29567_MAP_3	LTR	Novel	4336.3	2192.2	2144.1	818	1091.4	656	447.3	233.2	207.5	485	397.9
Sj_Blaster_Grouper_23385_MAP_8	LTR	Novel	4335.7	1763.8	2571.9	484.4	1046.7	413.8	541.3	302.8	361.7	562.8	622.2
Sj_Blaster_Grouper_31926_MAP_4	LTR	NONAUT-3_1p	4332.3	1734.1	2598.2	534.7	1124.6	400.7	511.8	258.7	341.3	540	620.5
Sj_Blaster_Grouper_32589_MAP_3	LTR	SACI-7_2p	4328.3	2087.7	2240.6	885.3	1201.7	562.6	475.4	204.8	169.7	435	393.8
Sj_Blaster_Grouper_17894_MAP_20	LTR	Novel	4326.9	2954.6	1372.3	1208.6	252.9	655.2	402.9	649.2	417.2	441.6	299.3
Sj_Blaster_Grouper_25873_MAP_6	LTR	Novel	4326.5	2011.2	2315.3	713.9	886.3	483.1	473	336.8	425.6	477.4	530.4
Sj_Blaster_Grouper_18940_MAP_3	LTR	Novel	4315.1	2298.2	2016.9	940.1	534.8	514.2	628	436.7	423.5	407.2	430.6
Sj_Blaster_Piler_29.51_MAP_11	LTR	Novel	4314.2	2327	1987.2	1262.1	769.6	473	612	195	202.4	396.9	403.2
Sj_Blaster_Grouper_19896_MAP_3	LTR	Novel	4313.1	1203.8	3109.3	167.2	286.3	158.6	471.5	40.6	249	837.4	2102.5
Sj_Blaster_Grouper_25967_MAP_3	LTR	Novel	4311.8	1434.3	2877.5	197.4	297.6	194.3	407.9	49.1	230.6	993.5	1941.4
Sj_Blaster_Grouper_12520_MAP_20	LTR	Novel	4309.8	2917.7	1392.1	1145.1	256	657	410.6	662.8	424.6	452.8	300.9
Sj_Blaster_Grouper_29217_MAP_6	LTR	NONAUT-3_1p	4308	1788.3	2519.7	553.1	1045.8	400.2	518	278.5	345.8	556.5	610.1
Sj_Blaster_Grouper_28469_MAP_3	LTR	Novel	4307.2	2197.2	2110	1161.9	828.4	455.5	644.8	193.8	213.8	386	423
Sj_Blaster_Grouper_27076_MAP_3	LTR	Novel	4307	1144.3	3162.7	161.4	288.6	149.4	437.1	38.7	245.2	794.8	2191.8
Sj_Blaster_Grouper_32071_MAP_5	LTR	Novel	4303.5	2299.3	2004.2	1175.6	822.5	480.5	566.2	216.4	196	426.8	419.5
Sj_Blaster_Grouper_25731_MAP_19	LTR	Novel	4300.5	2031.6	2268.9	772.9	903.3	462.7	429.2	352.4	434	443.6	502.4
Sj_Blaster_Grouper_28864_MAP_20	LTR	Novel	4297.2	2199.5	2097.7	891.5	1085.7	674.5	459.4	213	185.5	420.5	367.1
Sj_Blaster_Grouper_29017_MAP_5	LTR	Novel	4289.8	2168.6	2121.2	870.2	1031	671.3	478.8	208.7	204.5	418.4	406.9
Sj_Blaster_Grouper_28440_MAP_3	LTR	Novel	4289.4	2778.1	1511.3	1193.8	448	549	354.3	365.9	238.2	669.4	470.8
Sj_Blaster_Grouper_28403_MAP_3	LTR	Novel	4288.2	1760.8	2527.4	583.2	1108.6	406	498.6	258.4	329	513.2	591.2
Sj_Blaster_Grouper_32790_MAP_20	LTR	GYPSY70_AG2p	4284.5	2078.3	2206.2	828.4	1112.6	609.8	469.6	212.1	210.2	428	413.8
Sj_Blaster_Grouper_23163_MAP_4	LTR	Novel	4278.5	2783.6	1494.9	299.5	204.6	424.8	193.5	229	48.9	1830.3	1047.9
Sj_Blaster_Grouper_22026_MAP_11	LTR	Novel	4268.6	2300.7	1967.9	912.1	961.2	675.9	431.4	240.1	199.6	472.6	375.7
Sj_Blaster_Grouper_29242_MAP_3	LTR	Novel	4267.5	1901.8	2365.7	744.8	1210.7	585.5	504.6	182.2	210.8	389.3	439.6
Sj_Blaster_Grouper_17498_MAP_5	LTR	Novel	4263.6	2637.9	1625.7	1048.1	608.7	639.3	394.1	325.1	260.4	625.4	362.5
Sj_Blaster_Grouper_29482_MAP_12	LTR	Novel	4260.2	2393.8	1866.4	991.6	908.1	698.4	424.2	234.5	187.6	469.3	346.5
Sj_Blaster_Grouper_19970_MAP_7	LTR	Novel	4258.2	2529.7	1728.5	1065	482.7	500.8	410.9	348.4	278.5	615.5	556.4
Sj_Blaster_Grouper_33477_MAP_4	LTR	Novel	4256.2	2586	1670.2	305.2	232.4	375.6	216.1	210	53.4	1695.2	1168.3
Sj_Blaster_Grouper_15726_MAP_16	LTR	Novel	4254.6	1622.9	2631.7	608.1	1045.2	392.9	638.7	260.3	324.6	361.6	623.2
Sj_Blaster_Grouper_30708_MAP_3	LTR	Novel	4253.9	1432.7	2821.2	184.7	297.1	183.3	432	47.9	207.5	1016.8	1884.6
Sj_Blaster_Grouper_33072_MAP_5	LTR	Novel	4253.3	2133.6	2119.7	835.4	1094.7	643.7	447.6	218.5	196.1	436	381.3
Sj_Blaster_Grouper_29519_MAP_4	LTR	Novel	4252.7	2789.5	1463.2	304.9	200.1	405.8	193.5	226.3	50.1	1852.5	1019.5
Sj_Blaster_Grouper_30839_MAP_3	LTR	SACI-7_2p	4250.6	1952.2	2298.4	845.6	1191.9	544.9	476	188.3	217.6	373.4	412.9
Sj_Blaster_Grouper_23810_MAP_5	LTR	Novel	4243.3	2556.5	1686.8	1055.5	480.7	529.9	396.9	352.1	269.9	619	539.3
Sj_Blaster_Grouper_28502_MAP_7	LTR	Novel	4243.2	2404.1	1839.1	1020	512.8	503.3	435.9	322.1	310.9	558.7	579.5
Sj_Blaster_Grouper_34008_MAP_15	LTR	Novel	4241.8	2832.2	1409.6	299.5	197.4	418.7	184.7	231.8	47.1	1882.2	980.4
Sj_Blaster_Grouper_28223_MAP_4	LTR	Novel	4241.1	1763.9	2477.2	518.1	1113.6	420	485.5	278.7	314	547.1	564.1
Sj_Blaster_Grouper_27269_MAP_20	LTR	Novel	4240.7	2531	1709.7	1085.2	492.3	507.3	417.7	340.9	275.3	597.6	524.4
Sj_Blaster_Grouper_25094_MAP_3	LTR	Novel	4239.5	1987.2	2252.3	973.1	1090.2	581.2	508.4	216.6	318.1	216.3	335.6
Sj_Blaster_Grouper_20871_MAP_5	LTR	Novel	4238.8	2617	1621.8	1034.2	607.1	637.4	393.3	322.4	259.5	623	361.9
Sj_Blaster_Grouper_19350_MAP_9	LTR	Novel	4236.6	1261.9	2974.7	173.1	285.5	165	451.7	42.4	242.8	881.4	1994.7
Sj_Blaster_Grouper_31764_MAP_20	LTR	Novel	4229.3	1925.3	2304	931.9	905.7	430	718	188.3	225.3	375.1	455
Sj_Blaster_Grouper_21486_MAP_3	LTR	Novel	4228.7	2011	2217.7	1000.5	863.7	433.5	660.5	199.5	234.1	377.5	459.4
Sj_Blaster_Grouper_19145_MAP_4	LTR	Novel	4227.9	2609.1	1618.8	1031.1	606.4	635.5	392	321.9	259.4	620.6	361
Sj_Blaster_Grouper_7219_MAP_5	LTR	Novel	4226.4	1234.2	2992.2	273	1231.3	372.5	670.5	336.3	649.5	252.4	440.9
Sj_Blaster_Grouper_20663_MAP_20	LTR	Novel	4226.2	2116.2	2110	809.4	1055	635	452.6	224.1	206.5	447.7	395.9
Sj_Blaster_Grouper_28341_MAP_7	LTR	Novel	4219.8	2075.2	2144.6	770.3	1065.5	607.7	483	231.3	205.6	465.9	390.5
Sj_Blaster_Grouper_26814_MAP_3	LTR	Novel	4216.3	1154.1	3062.2	166.8	276.2	153.4	448.1	38.7	245.7	795.2	2092.2
Sj_Blaster_Grouper_29731_MAP_8	LTR	Novel	4215.3	1918.8	2296.5	552	993.5	458	472.7	312	302.4	596.8	527.9
Sj_Blaster_Grouper_31880_MAP_3	LTR	Novel	4208.5	2046.3	2162.2	1007.8	882.2	462.7	639.5	196.2	208.5	379.6	432
Sj_Blaster_Grouper_29272_MAP_7	LTR	Novel	4193.9	1939.2	2254.7	774.4	1188.1	580.5	435.1	195.5	224	388.8	407.5
Sj_Blaster_Grouper_29163_MAP_5	LTR	Novel	4191.7	2515.2	1676.5	1103.6	491.6	506.2	415	327	255.3	578.4	514.6
Sj_Blaster_Grouper_32107_MAP_3	LTR	SACI-7_2p	4188.9	2297	1891.9	1125.1	745.7	515.1	567.6	220.9	191.8	435.9	386.8
Sj_Blaster_Grouper_30521_MAP_4	LTR	Novel	4184.3	1147.2	3037.1	460.5	1199.9	280.1	908.9	181.2	417	225.4	511.3
Sj_Blaster_Grouper_28237_MAP_3	LTR	Novel	4178.2	3007.4	1170.8	282.1	159	449.5	151.7	236.6	39.1	2039.2	821
Sj_Blaster_Grouper_28524_MAP_20	LTR	Novel	4177.6	1672.2	2505.4	574.8	1103.4	391.7	507.6	227.2	318.6	478.5	575.8
Sj_Blaster_Grouper_32592_MAP_9	LTR	Novel	4176.9	2253.6	1923.3	898.3	967.1	703	418.2	221.6	181	430.7	357
Sj_Blaster_Grouper_27717_MAP_3	LTR	Novel	4175.3	2088.4	2086.9	865.7	1044.1	630.8	454.4	194.7	198.5	397.2	389.9
Sj_Blaster_Grouper_26225_MAP_3	LTR	Novel	4175	4147.7	27.3	959.8	15.3	1642.2	8.4	1155.4	0.8	390.3	2.8
Sj_Blaster_Grouper_26118_MAP_8	LTR	Novel	4174.2	1994.3	2179.9	817.9	1065.9	532	479	205.1	224.3	439.3	410.7
Sj_Blaster_Grouper_23145_MAP_7	LTR	Novel	4173	2453.2	1719.8	950.2	671	478.1	386.4	492	296.7	532.9	365.7
Sj_Blaster_Grouper_26361_MAP_10	LTR	Novel	4163.3	1789.7	2373.6	835.8	950	404.2	702.2	193.5	240.8	356.2	480.6
Sj_Blaster_Grouper_30004_MAP_5	LTR	Novel	4158	2135.5	2022.5	828.5	971.7	633.8	455.9	224.1	206.3	449.1	388.6
Sj_Blaster_Grouper_20536_MAP_6	LTR	Novel	4155.1	1647.9	2507.2	463	1060.5	385.6	488.9	269.8	341.7	529.5	616.1
Sj_Blaster_Grouper_32559_MAP_5	LTR	Novel	4154.6	2375.6	1779	1127.1	655.6	488.6	425.4	260.1	227.4	499.8	470.6
Sj_Blaster_Grouper_29640_MAP_3	LTR	Novel	4154.4	1870	2284.4	737.3	1156.3	574.6	499.1	178.1	205	380	424
Sj_Blaster_Grouper_29180_MAP_11	LTR	Novel	4154	1690.1	2463.9	932.3	1015.2	309.8	713.5	127.9	242.8	320.1	492.4
Sj_Blaster_Grouper_7586_MAP_3	LTR	Novel	4153.9	840.6	3313.3	482.5	1916.6	210.5	655.7	50.4	280.4	97.2	460.6
Sj_Blaster_Grouper_26340_MAP_3	LTR	Novel	4152.5	2547.3	1605.2	306.7	225.8	362	210.5	210.7	54	1667.9	1114.9
Sj_Blaster_Grouper_24148_MAP_3	LTR	NONAUT-5_1p	4141.7	1644.7	2497	464.1	1081.6	389.3	495.5	263.8	330.3	527.5	589.6
Sj_Blaster_Grouper_23483_MAP_3	LTR	Novel	4136.9	2395.4	1741.5	1071.1	500.2	466.5	413.9	302	279.8	555.8	547.6
Sj_Blaster_Grouper_30792_MAP_3	LTR	Novel	4136.8	1979.9	2156.9	733.7	1078.3	583.8	469.4	222.4	208	440	401.2
Sj_Blaster_Grouper_28742_MAP_4	LTR	Novel	4136.7	2518.3	1618.4	1145.7	550.7	516.1	384.5	299.4	221.7	557.1	461.5
Sj_Blaster_Grouper_20172_MAP_5	LTR	Novel	4126	2311.5	1814.5	1067.3	985.4	740.5	350.6	239.1	236.3	264.6	242.2
Sj_Blaster_Grouper_29006_MAP_4	LTR	Novel	4125.9	2314	1811.9	1053.5	552.1	460.5	438	282.6	268.2	517.4	553.6
Sj_Blaster_Grouper_23813_MAP_5	LTR	Novel	4125.7	2688.4	1437.3	293.5	199.9	395.4	187.5	221.6	48.1	1777.9	1001.8
Sj_Blaster_Grouper_6924_MAP_20	LTR	Novel	4122.8	1244.5	2878.3	248.8	1136.6	374.9	650.7	357.6	645.9	263.2	445.1
Sj_Blaster_Grouper_28243_MAP_5	LTR	Novel	4122	2931.4	1190.6	276.6	166.5	436.3	158.2	238.2	39.6	1980.3	826.3
Sj_Blaster_Grouper_26128_MAP_3	LTR	Novel	4119.9	1362.3	2757.6	187.9	286.7	178.7	399.5	45.7	221.5	950	1849.9
Sj_Blaster_Grouper_29906_MAP_5	LTR	Novel	4117.7	2043.8	2073.9	766.6	1048.1	614	442.3	221.4	199.8	441.8	383.7
Sj_Blaster_Grouper_27547_MAP_8	LTR	Novel	4117.2	2077.4	2039.8	852	1006.1	620.3	453.3	201.3	197.2	403.8	383.2
Sj_Blaster_Grouper_27686_MAP_5	LTR	Novel	4114.1	1636.9	2477.2	473.2	1060.6	378.4	486.7	271.1	330.1	514.2	599.8
Sj_Blaster_Grouper_24661_MAP_20	LTR	Novel	4113.3	2505.8	1607.5	1066.2	443.8	493.2	389.6	348.9	258.5	597.5	515.6
Sj_Blaster_Grouper_30458_MAP_3	LTR	Novel	4113.1	2068.4	2044.7	855.3	1051.9	638.4	441.7	196.5	185.9	378.2	365.2
Sj_Blaster_Grouper_7184_MAP_4	LTR	Novel	4111	733.3	3377.7	435.4	2217.4	178.3	547.3	43.9	245	75.7	368
Sj_Blaster_Grouper_27685_MAP_20	LTR	Novel	4108.9	1525.8	2583.1	453.2	1117.4	343.3	503	257.1	342	472.2	620.7
Sj_Blaster_Grouper_25676_MAP_6	LTR	Novel	4104.2	1972.7	2131.5	766.4	924.4	530.2	460.9	229.1	289.2	447	457
Sj_Blaster_Grouper_22218_MAP_20	LTR	Novel	4097.7	2492.3	1605.4	298.5	224.2	373.1	210.2	209.5	53.3	1611.2	1117.7
Sj_Blaster_Grouper_27553_MAP_20	LTR	Novel	4093.7	1642.6	2451.1	492.2	1090.4	384.7	477.6	254.4	313.3	511.3	569.8
Sj_Blaster_Grouper_24723_MAP_3	LTR	Novel	4093.7	1417	2676.7	191.4	284.8	181	400.5	46.2	217.8	998.4	1773.6
Sj_Blaster_Grouper_21449_MAP_8	LTR	Novel	4089.5	2458.5	1631	1055.6	457.6	490.7	398.3	331.7	260	580.5	515.1
Sj_Blaster_Grouper_31169_MAP_3	LTR	Novel	4087.3	2087.8	1999.5	1083.6	763.5	434.5	612.5	193.4	208.9	376.3	414.6
Sj_Blaster_Grouper_26892_MAP_13	LTR	Novel	4087.3	1976.2	2111.1	1019.1	1051.8	406	597.7	266.6	214.8	284.5	246.8
Sj_Blaster_Grouper_23135_MAP_3	LTR	Novel	4086.9	1143	2943.9	156.3	271.9	150	447.7	38.8	236.8	797.9	1987.5
Sj_Blaster_Grouper_26969_MAP_4	LTR	Novel	4084.2	1638.8	2445.4	574.2	888.6	401.8	505.9	251.2	455.8	411.6	595.1
Sj_Blaster_Grouper_29693_MAP_3	LTR	Novel	4081.1	2472.2	1608.9	1228.5	750.7	523.9	472.9	347.1	185.3	372.7	200
Sj_Blaster_Grouper_31196_MAP_3	LTR	Novel	4080	1976.1	2103.9	997.2	816.2	420.6	649	193.5	215.1	364.8	423.6
Sj_Blaster_Grouper_28683_MAP_9	LTR	Novel	4079.5	1713.9	2365.6	589.9	1095.4	411.4	492.9	235.8	277.8	476.8	499.5
Sj_Blaster_Grouper_30296_MAP_4	LTR	Novel	4078.6	2164.1	1914.5	889.5	981.4	646.5	361.5	205.8	176.9	422.3	394.7
Sj_Blaster_Grouper_27863_MAP_7	LTR	Novel	4078.4	1756.7	2321.7	680.4	895.5	398.9	451.7	302.5	471.2	374.9	503.3
Sj_Blaster_Grouper_27404_MAP_3	LTR	Novel	4077.1	1875.1	2202	909	896.2	423.5	671.7	177.7	215	364.9	419.1
Sj_Blaster_Grouper_27852_MAP_3	LTR	Novel	4073.4	2468.3	1605.1	306.4	220	365.4	206.5	203.7	53.9	1592.8	1124.7
Sj_Blaster_Grouper_27096_MAP_20	LTR	Novel	4073	2313	1760	1015.5	519.3	469	415	307.2	277.5	521.3	548.2
Sj_Blaster_Grouper_25942_MAP_6	LTR	Novel	4071.3	2020.2	2051.1	857.6	776.9	440.6	552.2	288.5	259.7	433.5	462.3
Sj_Blaster_Grouper_22972_MAP_20	LTR	Novel	4067.7	2078.5	1989.2	1078.1	809.1	438.6	604.1	189.6	193.4	372.2	382.6
Sj_Blaster_Grouper_27965_MAP_11	LTR	Novel	4062.9	1993.4	2069.5	959.1	795.1	443.9	643.8	206.5	213.5	383.9	417.1
Sj_Blaster_Grouper_26916_MAP_4	LTR	Novel	4061.8	1101.7	2960.1	157.2	270	146.4	428.5	36.7	235.9	761.4	2025.7
Sj_Blaster_Grouper_21225_MAP_4	LTR	Novel	4058.4	1793.7	2264.7	970.1	1049.8	350.1	719.1	232.3	235.4	241.2	260.4
Sj_Blaster_Grouper_25745_MAP_5	LTR	Novel	4057.7	26.9	4030.8	14.9	929.1	8.4	1611.6	0.8	1112.4	2.8	377.7
Sj_Blaster_Grouper_28238_MAP_5	LTR	Novel	4057.3	1148.4	2908.9	456.2	1113.4	283.9	892.1	182.7	398.4	225.6	505
Sj_Blaster_Grouper_24163_MAP_6	LTR	Novel	4056.7	25.9	4030.8	14.4	928.8	8.1	1611.7	0.7	1112.6	2.7	377.7
Sj_Blaster_Grouper_18105_MAP_8	LTR	Novel	4054.4	2901.1	1153.3	1107.4	462.1	888.6	281.5	395.7	183.6	509.4	226.1
Sj_Blaster_Grouper_25909_MAP_8	LTR	Novel	4054.4	1601.2	2453.2	461.1	1070.7	392.3	496.1	249	322	498.8	564.4
Sj_Blaster_Grouper_28836_MAP_5	LTR	Novel	4053.3	1601.1	2452.2	602.8	1104	374.9	524.2	206.2	288.5	417.2	535.5
Sj_Blaster_Grouper_31765_MAP_3	LTR	Novel	4047.6	1785.2	2262.4	855	908.9	407.8	686.3	181.4	219.4	341	447.8
Sj_Blaster_Grouper_32493_MAP_20	LTR	Novel	4047.5	1338.4	2709.1	504.6	995.2	255.8	484.3	127.9	380.8	450.1	848.8
Sj_Blaster_Grouper_28660_MAP_5	LTR	Novel	4045.7	2351.1	1694.6	945.1	862.3	712.8	322.9	231.9	156.7	461.3	352.7
Sj_Blaster_Grouper_29333_MAP_9	LTR	Novel	4041.2	1689.7	2351.5	925.6	973.8	308.9	700.4	126.3	224.4	328.9	452.9
Sj_Blaster_Grouper_28253_MAP_5	LTR	Novel	4040	1853.5	2186.5	479.9	908.3	586.5	480.4	389	417.2	398.1	380.6
Sj_Blaster_Grouper_33252_MAP_6	LTR	Novel	4039.8	2738.5	1301.3	283	179.4	395.8	168.2	219.4	43.5	1840.3	910.2
Sj_Blaster_Grouper_8162_MAP_4	LTR	Novel	4038.2	2370.9	1667.3	1110.7	486.8	457.1	498.5	411.8	355.5	391.3	326.5
Sj_Blaster_Grouper_25609_MAP_20	LTR	Novel	4029.6	1324	2705.6	469.3	1170.5	267.8	476.7	103.3	257.2	483.6	801.2
Sj_Blaster_Grouper_31996_MAP_9	LTR	Novel	4025.9	2168.9	1857	1059	719.2	475.3	564.7	214.6	194.1	420	379
Sj_Blaster_Grouper_12152_MAP_4	LTR	Novel	4024.8	2671	1353.8	942.7	604.4	1013.9	489.3	389.1	121.3	325.3	138.8
Sj_Blaster_Grouper_34311_MAP_3	LTR	SACI-7_2p	4023.1	1897.2	2125.9	971.2	832.8	393.4	624.3	184.8	219	347.8	449.8
Sj_Blaster_Grouper_21095_MAP_5	LTR	Novel	4022.6	1945.6	2077	971.4	823.1	411.7	643	192.3	211.1	370.2	399.8
Sj_Blaster_Grouper_18408_MAP_3	LTR	Novel	4020.8	2259.9	1760.9	1043.6	955.4	724	340.5	234.1	229.1	258.2	235.9
Sj_Blaster_Grouper_29764_MAP_5	LTR	Novel	4020.4	2184.2	1836.2	876.2	1013.4	654.3	339.6	212.7	129.4	441	353.8
Sj_Blaster_Grouper_24963_MAP_3	LTR	Novel	4019.2	2253.9	1765.3	963.6	611	428.4	455.6	360	271.7	501.9	427
Sj_Blaster_Grouper_28698_MAP_5	LTR	Novel	4019	1605.1	2413.9	874.2	978.5	288.2	700.7	124.5	246.4	318.2	488.3
Sj_Blaster_Grouper_20189_MAP_3	LTR	Novel	4018.5	2236.2	1782.3	1037	962	713.1	348.7	232.2	231.7	253.9	239.9
Sj_Blaster_Grouper_10430_MAP_4	LTR	Novel	4017.5	2887.1	1130.4	1193.7	218.1	644.2	349.8	630.2	328	419	234.5
Sj_Blaster_Grouper_17491_MAP_3	LTR	Novel	4017.1	1769.6	2247.5	960.9	1030.4	341.4	723.7	230.6	233.5	236.7	259.9
Sj_Blaster_Grouper_34540_MAP_3	LTR	Novel	4016.6	2555.2	1461.4	276.7	210.2	383.4	192.3	206	46.3	1689.1	1012.6
Sj_Blaster_Grouper_29615_MAP_3	LTR	Novel	4016	2201.9	1814.1	848.3	958.8	682.3	325.3	221.7	167.2	449.6	362.8
Sj_Blaster_Grouper_32307_MAP_11	LTR	Novel	4015.6	2565.9	1449.7	1132.4	540.2	553.5	325.6	314.6	194.6	565.4	389.3
Sj_Blaster_Grouper_29199_MAP_6	LTR	Novel	4012.4	2319.7	1692.7	955.9	936.8	695.4	312.1	224.1	121.8	444.3	322
Sj_Blaster_Grouper_29696_MAP_5	LTR	Novel	4011.2	1884.4	2126.8	1046.7	911.8	317.1	587.2	164.6	206.2	356	421.6
Sj_Blaster_Grouper_30068_MAP_19	LTR	SACI-7_2p	4007.4	2227.4	1780	875.8	865.8	690.2	393	219.3	178.3	442.1	342.9
Sj_Blaster_Grouper_26492_MAP_3	LTR	Novel	4006.5	1634	2372.5	1112.9	950.9	170.8	728.6	161.3	318.9	189	374.1
Sj_Blaster_Grouper_22420_MAP_20	LTR	Novel	4005.8	1916.7	2089.1	779.3	1086	592.9	438.4	186.2	190.2	358.3	374.5
Sj_Blaster_Grouper_30003_MAP_15	LTR	Novel	4004.1	2338.8	1665.3	952.3	895.3	700.4	314.6	227.9	126	458.2	329.4
Sj_Blaster_Grouper_21936_MAP_3	LTR	Novel	4003.2	1839.8	2163.4	476	934.7	587.7	477.3	390.6	432.5	385.5	318.9
Sj_Blaster_Grouper_28412_MAP_7	LTR	Novel	4001.1	2671.6	1329.5	280.6	186	396.6	174.1	219.2	44.9	1775.2	924.5
Sj_Blaster_Grouper_26512_MAP_20	LTR	Novel	3999.4	2190.5	1808.9	841.1	901.8	669.8	394.1	226	176.1	453.6	336.9
Sj_Blaster_Grouper_27465_MAP_5	LTR	Novel	3997.9	2368.3	1629.6	948.9	1108.1	724.9	171	319.1	160.8	375.4	189.7
Sj_Blaster_Grouper_31404_MAP_3	LTR	Novel	3997.5	2476.8	1520.7	1044.1	425.7	496.3	360.9	346.2	251.4	590.2	482.7
Sj_Blaster_Grouper_28950_MAP_19	LTR	Novel	3996.7	2405.7	1591	1011.6	873.6	699.6	288.1	230.7	121.8	463.8	307.5
Sj_Blaster_Grouper_34150_MAP_3	LTR	SACI-7_2p	3996.1	1716.5	2279.6	680.7	887.3	390	434.9	289.4	446.8	356.4	510.6
Sj_Blaster_Grouper_25298_MAP_3	LTR	Novel	3995.9	1396.6	2599.3	497.6	1087.4	274.1	454.2	130.2	256.1	494.7	801.6
Sj_Blaster_Grouper_31430_MAP_7	LTR	Novel	3995.7	2104.5	1891.2	1047.6	778.4	452.9	526.6	208.3	189.8	395.7	396.4
Sj_Blaster_Grouper_33080_MAP_13	LTR	Novel	3989.7	1229.9	2759.8	442.6	1338.7	200.3	382.4	147	235.4	440	803.3
Sj_Blaster_Grouper_8717_MAP_3	LTR	Novel	3988.9	3100.2	888.7	1766.3	526.2	612.6	216.5	271.1	49	450.2	97
Sj_Blaster_Grouper_31973_MAP_7	LTR	SACI-5_1p	3986.6	2741.4	1245.2	1257.8	521.1	453.7	208.7	188.7	62.2	841.2	453.2
Sj_Blaster_Grouper_31504_MAP_8	LTR	Novel	3984.8	2262.4	1722.4	1038.3	572.7	453.7	413.5	273	234	497.4	502.2
Sj_Blaster_Grouper_27466_MAP_15	LTR	Novel	3983.3	1882.8	2100.5	754.2	1078.5	579.2	437.3	186.1	196.4	363.3	388.3
Sj_Blaster_Grouper_12301_MAP_3	LTR	Novel	3981.9	1419.3	2562.6	1038.6	1155.6	114.8	829.1	115.3	301.7	150.6	276.2
Sj_Blaster_Grouper_31353_MAP_3	LTR	NONAUT-5_1p	3977.9	1701.3	2276.6	476.6	951.8	409.8	491.7	280.7	318.7	534.2	514.4
Sj_Blaster_Grouper_28376_MAP_20	LTR	Novel	3973.9	1984.5	1989.4	741.3	1012.4	617.6	436.3	209.5	171.6	416.1	369.1
Sj_Blaster_Grouper_30783_MAP_11	LTR	Novel	3970.8	2083.2	1887.6	1011	743.9	456.8	576.6	208.7	191.9	406.7	375.2
Sj_Blaster_Grouper_33540_MAP_3	LTR	Novel	3970.1	2141.4	1828.7	821.5	913.2	631.2	402.8	230.5	163.4	458.2	349.3
Sj_Blaster_Grouper_32413_MAP_6	LTR	SACI-7_2p	3967.7	1947.8	2019.9	1009	781.8	401.9	631.8	180.9	208.1	356	398.2
Sj_Blaster_Grouper_34873_MAP_6	LTR	Novel	3963	2158	1805	862.9	868.4	633.9	407.2	220.7	184.1	440.5	345.3
Sj_Blaster_Grouper_31273_MAP_9	LTR	Novel	3962	1958.2	2003.8	961.4	768.1	424.7	615.3	196	207.2	376.1	413.2
Sj_Blaster_Grouper_30261_MAP_3	LTR	Novel	3961.7	2559.8	1401.9	1112.4	433.6	528.2	345	328.6	201.6	590.6	421.7
Sj_Blaster_Grouper_27627_MAP_6	LTR	Novel	3959.9	1636	2323.9	487.5	1047.6	388	461.2	249.5	292.4	511	522.7
Sj_Blaster_Grouper_31101_MAP_3	LTR	BN000804_1p	3957.8	2365.2	1592.6	948.1	1082.2	724.2	164.9	318.6	159.3	374.3	186.2
Sj_Blaster_Grouper_27519_MAP_18	LTR	Novel	3957.7	2044.6	1913.1	1032	751.4	430.9	590.6	195.8	189.1	385.9	382
Sj_Blaster_Grouper_30196_MAP_3	LTR	BN000804_1p	3957	2365.2	1591.8	948.1	1082.1	724.2	164.6	318.6	159.1	374.3	186
Sj_Blaster_Grouper_27467_MAP_3	LTR	Novel	3956.5	1897.6	2058.9	774.6	1099.5	564	423.2	184.6	172.8	374.4	363.4
Sj_Blaster_Grouper_29240_MAP_4	LTR	Novel	3956.1	2310.9	1645.2	1062.8	554.1	467.8	400.6	276.9	225.2	503.4	465.3
Sj_Blaster_Grouper_22533_MAP_3	LTR	Novel	3952.7	2599.5	1353.2	286	188.9	367.7	174.9	212.1	45.4	1733.7	944
Sj_Blaster_Grouper_33018_MAP_3	LTR	Novel	3944.4	1987.1	1957.3	797.8	1034.2	598.7	397.7	199.6	183.5	391	341.9
Sj_Blaster_Grouper_30048_MAP_4	LTR	Novel	3938.7	1677.4	2261.3	558.9	1045.3	415.3	458.7	222.8	263.1	480.4	494.2
Sj_Blaster_Grouper_25603_MAP_8	LTR	Novel	3936.3	2813.2	1123.1	1065.3	346.3	671.5	309.5	358.2	173.7	718.2	293.6
Sj_Blaster_Grouper_14776_MAP_20	LTR	Novel	3936.1	1812.3	2123.8	469.5	912.2	552.5	463.2	393.3	383	397	365.4
Sj_Blaster_Grouper_25310_MAP_4	LTR	Novel	3933.4	2228.9	1704.5	875.8	663.7	423.4	384.4	447.9	297.3	481.8	359.1
Sj_Blaster_Grouper_28646_MAP_3	LTR	Novel	3930.7	1267.1	2663.6	179.6	269.5	168.4	396.2	42.1	215.8	877	1782.1
Sj_Blaster_Grouper_27989_MAP_3	LTR	SACI-7_2p	3930	2325.8	1604.2	909.6	635.9	439.2	360.2	460.4	268.2	516.6	339.9
Sj_Blaster_Grouper_19232_MAP_4	LTR	Novel	3929	1662.6	2266.4	907	1044.9	324.7	729.7	210.1	234.1	220.8	257.7
Sj_Blaster_Grouper_26778_MAP_6	LTR	Novel	3927.2	1597.5	2329.7	470.2	1041.3	372.4	458.2	246.8	297	508.1	533.2
Sj_Blaster_Grouper_23967_MAP_19	LTR	Novel	3921.4	1727	2194.4	666.6	838	395.9	429.8	297.7	448.2	366.8	478.4
Sj_Blaster_Grouper_31593_MAP_4	LTR	Novel	3920.3	2421.1	1499.2	971.8	742.4	716.7	287.7	240.6	152.9	492	316.2
Sj_Blaster_Grouper_31801_MAP_3	LTR	Novel	3918.8	1722.9	2195.9	843.5	861.1	383.9	652.5	176	227.6	319.5	454.7
Sj_Blaster_Grouper_29408_MAP_3	LTR	Novel	3918.7	1683.3	2235.4	455.7	981.5	430.3	446.3	260.6	289.6	536.7	518
Sj_Blaster_Grouper_25678_MAP_5	LTR	Novel	3917.6	1845	2072.6	720.1	884.4	489.4	461.4	216.6	287.9	418.9	438.9
Sj_Blaster_Grouper_26891_MAP_8	LTR	Novel	3917.1	2245	1672.1	882.1	652.5	424.4	375.1	447.8	285.1	490.7	359.4
Sj_Blaster_Grouper_23108_MAP_5	LTR	Novel	3916	1626.3	2289.7	564.9	894.1	378.8	465	267.7	416.6	414.9	514
Sj_Blaster_Grouper_26878_MAP_4	LTR	Novel	3915.5	1419.5	2496	509.5	965	274.5	498.9	123	277	512.5	755.1
Sj_Blaster_Grouper_10991_MAP_10	LTR	Novel	3914.4	1963.4	1951	957.7	551.4	390.9	581.4	347.2	426.3	267.6	391.9
Sj_Blaster_Grouper_25265_MAP_20	LTR	Novel	3910.4	2534.9	1375.5	889.1	518.3	454.4	266.6	365.7	120.1	825.7	470.5
Sj_Blaster_Grouper_27024_MAP_3	LTR	Novel	3909.8	1933.9	1975.9	701.9	951	600.2	454.1	213.2	198.5	418.6	372.3
Sj_Blaster_Grouper_33460_MAP_3	LTR	GYPSY2_AGp	3909.4	2022.1	1887.3	783.5	967.1	619	402.5	209.9	182.4	409.7	335.3
Sj_Blaster_Grouper_30753_MAP_4	LTR	Novel	3908.9	1774.2	2134.7	968.2	998.7	339.9	681.6	228.4	210.1	237.7	244.3
Sj_Blaster_Grouper_19806_MAP_5	LTR	Novel	3908.7	1104.8	2803.9	445.5	1095.1	260.7	858.1	178.9	375.5	219.7	475.2
Sj_Blaster_Grouper_12751_MAP_4	LTR	Novel	3906.4	956.8	2949.6	323.7	1193.9	296.5	870.1	152.6	380.8	184	504.8
Sj_Blaster_Grouper_23177_MAP_5	LTR	Novel	3905.3	2739.8	1165.5	267.2	160.2	405.8	151.6	221.4	39.4	1845.4	814.3
Sj_Blaster_Grouper_30207_MAP_3	LTR	Novel	3899.8	2271.3	1628.5	1033.6	567.1	453.7	391.2	270.2	209.4	513.8	460.8
Sj_Blaster_Grouper_27057_MAP_18	LTR	Novel	3891.6	2201.2	1690.4	1098.3	690.5	498.7	426.8	210.6	180.7	393.6	392.4
Sj_Blaster_Grouper_21119_MAP_20	LTR	Novel	3891.4	2503.6	1387.8	1062.7	407.3	486	318.2	341.2	227.8	613.7	434.5
Sj_Blaster_Grouper_20323_MAP_3	LTR	Novel	3889.1	2730.3	1158.8	263	161.7	403.6	151.4	219.1	38.4	1844.6	807.3
Sj_Blaster_Grouper_24305_MAP_8	LTR	Novel	3887.9	1847.5	2040.4	880.5	791.7	418.9	624	186.7	213.4	361.4	411.3
Sj_Blaster_Grouper_30524_MAP_3	LTR	BN000804_1p	3882.7	1575.7	2307	1072.3	912.1	160.4	712.7	158.8	314.6	184.2	367.6
Sj_Blaster_Grouper_25470_MAP_20	LTR	Novel	3881.7	2621.9	1259.8	925.9	455.2	476.5	248.5	376.6	113.1	842.9	443
Sj_Blaster_Grouper_27700_MAP_3	LTR	Novel	3879.6	1910.8	1968.8	804.5	1006.6	495.6	415.3	197.9	192.4	412.8	354.5
Sj_Blaster_Grouper_21649_MAP_3	LTR	Novel	3879.1	2265.3	1613.8	953.5	604.9	534.2	392.7	262.8	257.8	514.8	358.4
Sj_Blaster_Grouper_25152_MAP_9	LTR	NONAUT-3_1p	3878.5	1782.5	2096	642.3	593	327.1	518.4	265.4	332.1	547.7	652.5
Sj_Blaster_Grouper_23436_MAP_9	LTR	Novel	3876	2026.8	1849.2	791.5	952.3	627.9	393.7	208.2	173.6	399.2	329.6
Sj_Blaster_Grouper_11720_MAP_5	LTR	Novel	3866.7	2724.5	1142.2	1090	214.3	616.4	356.2	616.3	333	401.8	238.7
Sj_Blaster_Grouper_30321_MAP_3	LTR	BN000804_1p	3865.8	2835.2	1030.6	911.2	295.4	741	307.1	388.4	166.2	794.6	261.9
Sj_Blaster_Grouper_30898_MAP_3	LTR	BN000804_1p	3865.8	1111.8	2754	447	1057.2	261.7	839.9	178.3	393.1	224.8	463.8
Sj_Blaster_Grouper_33143_MAP_7	LTR	Novel	3865.4	1560.6	2304.8	1083.6	913.3	151.5	712.1	150	314.4	175.5	365
Sj_Blaster_Grouper_17555_MAP_3	LTR	Novel	3865.3	2276.8	1588.5	961.1	433.4	496.3	495.7	428.2	334.8	391.2	324.6
Sj_Blaster_Grouper_34638_MAP_5	LTR	SACI-7_2p	3863.3	2194.6	1668.7	862.2	802.4	682.5	374.3	214.7	172.6	435.2	319.4
Sj_Blaster_Grouper_20829_MAP_3	LTR	Novel	3861.9	1735.5	2126.4	575.1	819.6	427.7	433.8	302.1	404.1	430.6	468.9
Sj_Blaster_Grouper_29925_MAP_3	LTR	SACI-7_2p	3861.2	2064.3	1796.9	1001.5	685.6	476.7	553.9	206	187.6	380.1	369.8
Sj_Blaster_Grouper_30059_MAP_3	LTR	Novel	3860.6	2740.5	1120.1	265.9	151	407.1	142.5	219.3	37.3	1848.2	789.3
Sj_Blaster_Grouper_22130_MAP_3	LTR	Novel	3860.3	1585.7	2274.6	458	998.2	386.5	457.7	248.3	301.2	492.9	517.5
Sj_Blaster_Grouper_24066_MAP_20	LTR	Novel	3859.6	1339.4	2520.2	413.6	960.1	245.2	410.2	231	425.8	449.6	724.1
Sj_Blaster_Grouper_24301_MAP_13	LTR	Novel	3853.9	2776.5	1077.4	1061.8	332.7	665	305	349.6	165.6	700.1	274.1
Sj_Blaster_Grouper_23414_MAP_3	LTR	Novel	3852.5	2859.3	993.2	252.2	139.1	422.3	130	230	33.5	1954.8	690.6
Sj_Blaster_Grouper_30621_MAP_4	LTR	Novel	3850.8	1743.4	2107.4	900.9	847.9	364.1	651.4	172.6	205.1	305.8	403
Sj_Blaster_Grouper_30497_MAP_7	LTR	Novel	3848.3	1679.8	2168.5	973.2	915.1	298.3	654	109.3	203.2	299	396.2
Sj_Blaster_Grouper_29397_MAP_5	LTR	Novel	3848.1	1707.7	2140.4	712.5	1072.4	494.6	465.3	159.3	204.1	341.3	398.6
Sj_Blaster_Grouper_22894_MAP_5	LTR	Novel	3846.4	1602.2	2244.2	617.3	895.3	349.3	422.6	275.1	437.5	360.5	488.8
Sj_Blaster_Grouper_25993_MAP_3	LTR	Novel	3845	1958.7	1886.3	799.2	905.3	565.6	420.8	193	193.5	400.9	366.7
Sj_Blaster_Grouper_28383_MAP_3	LTR	Novel	3842.8	2016.3	1826.5	859.6	1030.3	559.2	298.4	197.4	158.5	400.1	339.3
Sj_Blaster_Grouper_20571_MAP_5	LTR	Novel	3841.8	1596.2	2245.6	613	884.4	365.2	421.9	273.4	448	344.6	491.3
Sj_Blaster_Grouper_25981_MAP_6	LTR	Novel	3840.2	2007.8	1832.4	977.7	705.1	453.1	561.5	199.6	190	377.4	375.8
Sj_Blaster_Grouper_3748_MAP_20	LTR	Novel	3839.4	1821.9	2017.5	769	1051.4	490.5	418.3	174.6	187.4	387.8	360.4
Sj_Blaster_Grouper_31974_MAP_7	LTR	GYPSY2_AGp	3838.6	1614.8	2223.8	857.9	936.2	297.3	655.2	126.7	210.3	332.9	422.1
Sj_Blaster_Grouper_5571_MAP_3	LTR	Novel	3836.6	3026.8	809.8	1826.8	471.1	574.6	200.7	240.7	47.7	384.7	90.3
Sj_Blaster_Grouper_32805_MAP_19	LTR	Novel	3834.4	1395.8	2438.6	507	1065.1	267.4	400.6	101.4	196.6	520	776.3
Sj_Blaster_Grouper_26314_MAP_20	LTR	Novel	3834	2086.1	1747.9	807.7	823.7	649.4	400.7	212.5	180.4	416.5	343.1
Sj_Blaster_Grouper_28258_MAP_3	LTR	Novel	3830.6	2666.6	1164	259.2	159.7	403.2	151.4	217.8	38.7	1786.4	814.2
Sj_Blaster_Grouper_18272_MAP_6	LTR	Novel	3829.7	864	2965.7	303.9	1172.2	247.9	883.4	130.3	401.4	181.9	508.7
Sj_Blaster_Grouper_33077_MAP_4	LTR	Novel	3824.4	1277.3	2547.1	401.3	1212.8	257.7	293.9	211.7	436.4	406.6	604
Sj_Blaster_Grouper_26884_MAP_20	LTR	Novel	3824.4	1715.5	2108.9	857.6	812.8	388.2	669.6	161.6	207.3	308.1	419.2
Sj_Blaster_Grouper_29518_MAP_3	LTR	Novel	3819.7	2100.3	1719.4	852.8	924.9	640.4	314.3	201.9	150.8	405.2	329.4
Sj_Blaster_Grouper_21867_MAP_3	LTR	Novel	3816.2	1242.9	2573.3	395.1	1119.1	268.3	502.1	200.7	335.2	378.8	616.9
Sj_Blaster_Grouper_32484_MAP_4	LTR	Novel	3815	2289.8	1525.2	1029.6	518.7	459.7	363.1	281.6	201.5	518.9	441.9
Sj_Blaster_Grouper_28577_MAP_3	LTR	Novel	3814.6	2386.5	1428.1	1110.1	492.6	498.1	349.8	275.7	186.8	502.6	398.9
Sj_Blaster_Grouper_9928_MAP_5	LTR	Novel	3811	2915.2	895.8	1225.9	321	851	245.3	376	133.3	462.3	196.2
Sj_Blaster_Grouper_19980_MAP_3	LTR	Novel	3809.6	2043.9	1765.7	807.9	641.9	399.6	423.8	394.9	318.3	441.5	381.7
Sj_Blaster_Grouper_29741_MAP_3	LTR	Novel	3808.5	2231.1	1577.4	918.6	867.6	636.3	276.8	225.7	124.9	450.5	308.1
Sj_Blaster_Grouper_17717_MAP_20	LTR	Novel	3807.9	2318.7	1489.2	1014.1	406.5	466.6	369.1	305.7	236.4	532.3	477.2
Sj_Blaster_Grouper_25753_MAP_20	LTR	Novel	3801.7	2062.5	1739.2	814.9	801.3	636	408	208.9	186.6	402.7	343.3
Sj_Blaster_Grouper_24570_MAP_4	LTR	Novel	3801	2509.4	1291.6	835.8	482.3	465.4	259.2	417.9	162.6	790.3	387.5
Sj_Blaster_Grouper_27745_MAP_20	LTR	Novel	3798.9	2047.7	1751.2	812.5	810.7	623.8	410.4	206.8	187.4	404.6	342.7
Sj_Blaster_Grouper_20341_MAP_4	LTR	Novel	3795.3	1515.7	2279.6	752.4	1051.5	332	729.3	211.9	235.9	219.4	262.9
Sj_Blaster_Grouper_34732_MAP_3	LTR	Novel	3789.1	2517.6	1271.5	262.5	187.1	365.4	169.7	203	42.2	1686.7	872.5
Sj_Blaster_Grouper_26539_MAP_3	LTR	Novel	3787	1834.2	1952.8	703.3	980.1	573.1	417	186.1	192.5	371.7	363.2
Sj_Blaster_Grouper_29802_MAP_4	LTR	Novel	3783.2	2305	1478.2	1059.3	538	481.7	357.4	262.6	188.1	501.4	394.7
Sj_Blaster_Grouper_21360_MAP_3	LTR	Novel	3782.2	900.5	2881.7	123.6	245.4	115.6	419.8	30	225	631.3	1991.5
Sj_Blaster_Grouper_26578_MAP_4	LTR	Novel	3782	1917.7	1864.3	977.5	736.6	362.9	520.8	186.8	198.2	390.5	408.7
Sj_Blaster_Grouper_4313_MAP_6	LTR	Novel	3778.8	2698.7	1080.1	1085.9	211.1	613.6	340.6	607.8	306.3	391.4	222.1
Sj_Blaster_Grouper_29576_MAP_8	LTR	Novel	3777.4	1553.8	2223.6	552.4	1050.5	369.4	439.3	207.8	252	424.2	481.8
Sj_Blaster_Grouper_27778_MAP_4	LTR	Novel	3776.9	1958.2	1818.7	986	721.7	427.2	562.5	186.2	173.8	358.8	360.7
Sj_Blaster_Grouper_32433_MAP_5	LTR	Novel	3776.5	1681.2	2095.3	675.9	1059.3	488.3	446.3	168.6	202.8	348.4	386.9
Sj_Blaster_Grouper_31633_MAP_3	LTR	Novel	3776.5	1753.9	2022.6	821.2	797.3	404.2	625.5	180.4	197.4	348.1	402.4
Sj_Blaster_Grouper_28809_MAP_10	LTR	Novel	3776.4	1933.5	1842.9	759	963	606.2	382.2	195.2	172.2	373.1	325.5
Sj_Blaster_Grouper_33542_MAP_3	LTR	Novel	3776.3	2248	1528.3	894.2	830.3	649.1	283.3	229.3	118.6	475.4	296.1
Sj_Blaster_Grouper_31694_MAP_10	LTR	Novel	3773.8	1452.9	2320.9	789.3	966	264.6	693.7	109.7	222.7	289.3	438.5
Sj_Blaster_Grouper_25313_MAP_4	LTR	Novel	3768.3	2298.8	1469.5	1006.2	441.1	460.6	347.5	296.5	218.9	535.5	462
Sj_Blaster_Grouper_26623_MAP_4	LTR	Novel	3762.3	2100	1662.3	896.4	459.6	444.8	413.6	285.2	265.1	473.6	524
Sj_Blaster_Grouper_29648_MAP_5	LTR	Novel	3758.3	1724.4	2033.9	896	1010.8	354	574.5	231.8	202	242.6	246.6
Sj_Blaster_Grouper_27235_MAP_4	LTR	Novel	3755.8	2121.1	1634.7	798.2	815.5	657.8	353	221.7	166.6	443.4	299.6
Sj_Blaster_Grouper_29908_MAP_11	LTR	Novel	3752.9	2185	1567.9	915.2	811.4	646.7	299	209.5	129.3	413.6	328.2
Sj_Blaster_Grouper_29011_MAP_3	LTR	Novel	3749.2	1962.6	1786.6	997.2	702.8	416.5	540.9	192.8	178.7	356.1	364.2
Sj_Blaster_Grouper_29654_MAP_3	LTR	Novel	3749	1985.6	1763.4	751.1	841.6	623.2	402.2	200.4	177.8	410.9	341.8
Sj_Blaster_Grouper_27862_MAP_3	LTR	Novel	3747.8	1952.3	1795.5	740	855.6	602.1	417.8	208.9	163.3	401.3	358.8
Sj_Blaster_Grouper_28508_MAP_3	LTR	Novel	3747.8	1443.3	2304.5	553.5	1059.2	344.6	482.8	174.6	266.6	370.6	495.9
Sj_Blaster_Grouper_29078_MAP_5	LTR	Novel	3745.7	1531.5	2214.2	785.5	872.4	292.3	637.8	132.8	233.4	320.9	470.6
Sj_Blaster_Grouper_24602_MAP_20	LTR	Novel	3745.5	1246.4	2499.1	447.3	847.4	247.1	445.4	110.4	364.8	441.6	841.5
Sj_Blaster_Grouper_19342_MAP_20	LTR	Novel	3743.2	1448.8	2294.4	400.1	1001.4	363.7	461.7	230.7	306.2	454.3	525.1
Sj_Blaster_Grouper_28689_MAP_7	LTR	NONAUT-5_1p	3743.2	2288.4	1454.8	1035.7	525.9	467.1	350.8	268.7	191.8	516.9	386.3
Sj_Blaster_Grouper_9815_MAP_3	LTR	Novel	3740.4	1467.4	2273	1034.3	902.3	125.5	704.1	142.2	310.1	165.4	356.5
Sj_Blaster_Grouper_13629_MAP_3	LTR	Novel	3737.3	3046.8	690.5	1136.8	210.6	938.5	231.3	471.7	138.6	499.8	110
Sj_Blaster_Grouper_30590_MAP_3	LTR	Novel	3736.7	1965.5	1771.2	981.8	690	419.5	538.9	193.5	183.3	370.7	359
Sj_Blaster_Grouper_27497_MAP_4	LTR	Novel	3736.4	1765.7	1970.7	690.1	1025	534.2	415.1	176.7	183.8	364.7	346.8
Sj_Blaster_Grouper_27173_MAP_20	LTR	Novel	3734.4	2288.7	1445.7	1052.1	516.8	458.4	338.6	276.1	179.7	502.1	410.6
Sj_Blaster_Grouper_28045_MAP_5	LTR	Novel	3734	1998.4	1735.6	956.5	749.4	451	479.1	201.3	162.5	389.6	344.6
Sj_Blaster_Grouper_27963_MAP_4	LTR	Novel	3732.5	2016.2	1716.3	1032.3	659.9	418.1	517	194.8	177.2	371	362.2
Sj_Blaster_Grouper_32513_MAP_13	LTR	Novel	3730.3	1024.4	2705.9	420.9	1246.9	175	439.8	49.4	183.2	379.1	836
Sj_Blaster_Grouper_19115_MAP_20	LTR	Novel	3729.9	1606.8	2123.1	605.5	826.3	358.3	404.5	286	422.5	357	469.8
Sj_Blaster_Grouper_25617_MAP_3	LTR	Novel	3727.6	1676.1	2051.5	814	789	376.5	628.7	170.8	210.8	314.8	423
Sj_Blaster_Grouper_31277_MAP_3	LTR	Novel	3726.7	1858.1	1868.6	954.2	760.4	413	501.6	175	193.3	315.9	413.3
Sj_Blaster_Grouper_24924_MAP_4	LTR	Novel	3723.7	1742.7	1981	577.1	786.1	435.1	409.2	302.4	347.6	428.1	438.1
Sj_Blaster_Grouper_28037_MAP_9	LTR	Novel	3723	2021.2	1701.8	763.7	878.7	610.5	366.5	215.6	143.9	431.4	312.7
Sj_Blaster_Grouper_16243_MAP_6	LTR	Novel	3720.2	1545.7	2174.5	880.2	1003.7	283.8	695.3	190.4	227	191.3	248.5
Sj_Blaster_Grouper_29484_MAP_20	LTR	Novel	3717.4	1612.2	2105.2	819.3	829	319.2	626.3	134	217	339.7	432.9
Sj_Blaster_Grouper_27623_MAP_6	LTR	Novel	3716.2	2213.1	1503.1	973.1	393	445.3	388.2	285.6	241.4	509.1	480.5
Sj_Blaster_Grouper_8393_MAP_11	LTR	Novel	3711.4	2171.6	1539.8	1002.8	845.4	696.7	302.9	226	206.9	246.1	184.6
Sj_Blaster_Grouper_28815_MAP_12	LTR	Novel	3710.6	2002.5	1708.1	996	884.4	563.1	354	202.8	230.7	240.6	239
Sj_Blaster_Grouper_21334_MAP_3	LTR	Novel	3705.9	1217.7	2488.2	169.7	257.1	158.2	368.2	40.7	202.5	849.1	1660.4
Sj_Blaster_Grouper_25088_MAP_12	LTR	Novel	3704.7	1964.9	1739.8	775.8	939.5	611.7	358.5	197.3	153.5	380.1	288.3
Sj_Blaster_Grouper_29847_MAP_5	LTR	Novel	3702.4	2300.3	1402.1	1005.8	416.8	455.6	360.9	311.6	195.1	527.3	429.3
Sj_Blaster_Grouper_19365_MAP_3	LTR	Novel	3702.3	2172.6	1529.7	905.8	426	449.5	365.2	308.7	250.4	508.6	488.1
Sj_Blaster_Grouper_4635_MAP_3	LTR	Novel	3701.3	2982	719.3	1802.7	416.2	564.3	181	236.6	42	378.4	80.1
Sj_Blaster_Grouper_18429_MAP_5	LTR	Novel	3700	2331.1	1368.9	1016.9	378.7	448.8	326.5	315.8	221	549.6	442.7
Sj_Blaster_Grouper_32887_MAP_4	LTR	Novel	3699.5	2396.6	1302.9	262	184.2	353.8	171.3	188.5	43	1592.3	904.4
Sj_Blaster_Grouper_23786_MAP_12	LTR	Novel	3696.4	1689.5	2006.9	796.5	782	385.8	622	175.4	206.1	331.8	396.8
Sj_Blaster_Grouper_20490_MAP_3	LTR	Novel	3694.1	990.5	2703.6	137.4	253.2	128.5	428.5	33.1	208.1	691.5	1813.8
Sj_Blaster_Grouper_13559_MAP_3	LTR	Novel	3693	1016.9	2676.1	416.8	1114.2	242.5	806.6	162.4	343.4	195.2	411.9
Sj_Blaster_Grouper_26978_MAP_3	LTR	Novel	3691.7	2455.6	1236.1	246.1	174.3	375.2	155.9	193.5	39.4	1640.8	866.5
Sj_Blaster_Grouper_27391_MAP_3	LTR	Novel	3689.9	1106	2583.9	157.3	246.6	146.8	379.4	36.5	205.4	765.4	1752.5
Sj_Blaster_Grouper_27948_MAP_3	LTR	Novel	3686.6	2416.3	1270.3	253.8	184.7	345.7	167.2	198.1	41.8	1618.7	876.6
Sj_Blaster_Grouper_34398_MAP_3	LTR	Novel	3684.7	1904.2	1780.5	944.2	786.4	372.6	521	183.2	156.6	404.2	316.5
Sj_Blaster_Grouper_23020_MAP_11	LTR	Novel	3683.3	1742.9	1940.4	864.6	738.8	378.1	619	174.4	196.7	325.8	385.9
Sj_Blaster_Grouper_30243_MAP_4	LTR	Novel	3681.8	1042.3	2639.5	434.2	1087.5	248.4	803.5	162.6	349.3	197.1	399.2
Sj_Blaster_Piler_651.16_MAP_3	LTR	Novel	3681.6	1241.3	2440.3	380.8	1085.3	275	471.8	200.9	314.3	384.6	568.9
Sj_Blaster_Grouper_23624_MAP_3	LTR	Novel	3680.7	1695	1985.7	783.1	753.7	395.1	602.5	181.6	212	335.2	417.5
Sj_Blaster_Grouper_31410_MAP_13	LTR	Novel	3679.7	1680.7	1999	866.1	1007.7	350.2	561.9	229.5	198.4	234.9	231
Sj_Blaster_Grouper_25426_MAP_13	LTR	Novel	3673.5	1812.5	1861	670.3	917.1	576.8	423.4	193.8	180	371.6	340.5
Sj_Blaster_Grouper_21571_MAP_3	LTR	Novel	3673.5	1323.5	2350	370	941	312.8	499.9	222.5	337.4	418.2	571.7
Sj_Blaster_Grouper_29261_MAP_3	LTR	Novel	3671.8	1705.9	1965.9	650.6	1010.8	537	404.7	172.7	187.3	345.6	363.1
Sj_Blaster_Grouper_24062_MAP_3	LTR	Novel	3671.2	2695.3	975.9	1049.6	283.5	641.5	294	338.6	159.5	665.6	238.9
Sj_Blaster_Grouper_29566_MAP_3	LTR	NONAUT-3_1p	3668.7	1969	1699.7	949.5	573.2	393	412.2	220.7	224.5	405.8	489.8
Sj_Blaster_Grouper_25225_MAP_3	LTR	Novel	3664.7	1616.1	2048.6	613.7	1035.1	503.5	445.7	166.7	194.4	332.2	373.4
Sj_Blaster_Grouper_25433_MAP_6	LTR	Novel	3661.8	2039.4	1622.4	1063.2	610.6	425.7	502.4	184.2	169.5	366.3	339.9
Sj_Blaster_Grouper_26326_MAP_3	LTR	Novel	3661.1	2212.7	1448.4	882.5	565.8	412.6	322.4	434.8	239.5	482.8	320.7
Sj_Blaster_Grouper_28590_MAP_3	LTR	Novel	3649.7	1945.6	1704.1	940.7	555.1	382.6	415.4	217.2	238.3	405.1	495.3
Sj_Blaster_Grouper_27273_MAP_3	LTR	Novel	3648.8	2202.3	1446.5	935.7	378.8	437.6	374.1	455.5	371.9	373.5	321.7
Sj_Blaster_Grouper_24280_MAP_17	LTR	Novel	3645.6	1695.2	1950.4	649.6	743.1	384.5	380.9	292.4	389.6	368.7	436.8
Sj_Blaster_Grouper_21698_MAP_16	LTR	Novel	3645.3	1608.3	2037	602.3	819.2	355.3	378.7	289	389.9	361.7	449.2
Sj_Blaster_Piler_435.16_MAP_4	LTR	Novel	3642.4	1486.1	2156.3	408.2	916.1	363.4	455.2	237.4	292.8	477.1	492.2
Sj_Blaster_Grouper_23486_MAP_3	LTR	Novel	3641.5	1680.5	1961	840	749	362.3	601	168.9	204.5	309.3	406.5
Sj_Blaster_Grouper_25290_MAP_4	LTR	Novel	3640.4	1476.8	2163.6	817.3	892.4	261.6	654.9	110.8	210.2	287.1	406.1
Sj_Blaster_Grouper_32762_MAP_10	LTR	Novel	3635.5	2359.3	1276.2	258.3	178.8	348.7	168.1	192.2	42.5	1560.1	886.8
Sj_Blaster_Grouper_26912_MAP_7	LTR	Novel	3631.3	1984.3	1647	984.2	852.6	564	337.5	196.3	224.1	239.8	232.8
Sj_Blaster_Grouper_19798_MAP_6	LTR	Novel	3630.9	2229	1401.9	920.1	376.9	479	339.6	321.8	232.2	508.1	453.2
Sj_Blaster_Grouper_17154_MAP_4	LTR	Novel	3630.8	2564.5	1066.3	875.8	326.4	661.5	295.7	339	164.6	688.2	279.6
Sj_Blaster_Grouper_17005_MAP_20	LTR	Novel	3629.9	2294.8	1335.1	1004.6	360.1	443.8	320.3	305.2	218.3	541.2	436.4
Sj_Blaster_Grouper_30366_MAP_3	LTR	Novel	3628.1	2039	1589.1	795.3	774.7	643.8	353.1	206.7	163.9	393.2	297.4
Sj_Blaster_Grouper_26193_MAP_5	LTR	Novel	3625.6	1506.3	2119.3	450.8	940.7	345.8	427.4	234.7	270.7	475	480.5
Sj_Blaster_Grouper_27650_MAP_3	LTR	Novel	3623.8	1968.8	1655	989.8	861.9	549.2	336.4	196.6	224.7	233.2	232
Sj_Blaster_Grouper_23481_MAP_8	LTR	Novel	3623.3	2356.7	1266.6	1068.3	418.1	464.8	281.9	289.5	184.5	534.1	382.1
Sj_Blaster_Grouper_26507_MAP_6	LTR	Novel	3618.1	1472.7	2145.4	804.2	877.1	269	642.7	110	212	289.5	413.6
Sj_Blaster_Grouper_29793_MAP_5	LTR	Novel	3618	2110.7	1507.3	1005.8	527.5	413.6	361.5	244.4	197.3	446.9	421
Sj_Blaster_Grouper_30581_MAP_12	LTR	Novel	3617.1	1525	2092.1	803.3	814	289.8	634.6	119.9	216.1	312	427.4
Sj_Blaster_Grouper_29346_MAP_7	LTR	Novel	3616.3	1664.7	1951.6	868.6	979.8	338.2	546.2	225.1	194.8	232.8	230.8
Sj_Blaster_Grouper_28388_MAP_9	LTR	Novel	3614.6	1960.9	1653.7	984.6	859.7	547.8	337.4	196.2	224.7	232.3	231.9
Sj_Blaster_Grouper_22787_MAP_3	LTR	Novel	3614.1	1953.1	1661	974	888.6	548.8	327.1	201.2	217.5	229.1	227.8
Sj_Blaster_Grouper_31245_MAP_3	LTR	Novel	3611	2329.7	1281.3	258.8	179.9	334.2	166.7	190	42.8	1546.7	891.9
Sj_Blaster_Grouper_23333_MAP_20	LTR	Novel	3610.4	2203	1407.4	895.5	725.6	658.6	265.6	219.9	117.7	429	298.5
Sj_Blaster_Grouper_27307_MAP_4	LTR	Novel	3605.3	1526.1	2079.2	805.6	871.4	295.8	613.8	118.2	201.2	306.5	392.8
Sj_Blaster_Grouper_23363_MAP_4	LTR	Novel	3604.3	1675.4	1928.9	858.1	969.5	352	546.3	232.2	193.3	233.1	219.8
Sj_Blaster_Grouper_28811_MAP_6	LTR	Novel	3599.3	2304.6	1294.7	1066.8	448.2	455.8	305.8	274.7	179.4	507.3	361.3
Sj_Blaster_Grouper_30225_MAP_3	LTR	Novel	3596.2	1663.5	1932.7	862.3	968.9	341.1	544.9	227.1	194.6	233	224.3
Sj_Blaster_Grouper_22281_MAP_3	LTR	Novel	3596.2	2146.6	1449.6	909.1	371.3	456.5	365	290.1	240.9	490.9	472.4
Sj_Blaster_Grouper_26706_MAP_3	LTR	Novel	3594	1595.7	1998.3	609.1	792.4	362.4	364.1	278.7	402.2	345.5	439.6
Sj_Blaster_Grouper_23939_MAP_20	LTR	Novel	3591.2	1839.8	1751.4	742.4	843.4	566.6	392.4	180.9	176.7	349.9	338.9
Sj_Blaster_Grouper_26030_MAP_8	LTR	Novel	3591.2	2153.2	1438	934.5	411	439	338.9	288	235.3	491.7	452.8
Sj_Blaster_Grouper_18634_MAP_9	LTR	Novel	3589.3	1344.2	2245.1	383.9	916.7	310.3	473.5	211.1	317.8	438.9	537.1
Sj_Blaster_Grouper_20274_MAP_3	LTR	Novel	3588	2082.8	1505.2	808.3	498.5	424.7	361.6	402.1	283.6	447.7	361.5
Sj_Blaster_Grouper_23890_MAP_20	LTR	Novel	3587.1	1437.6	2149.5	736.4	869.2	277.8	634.1	124	218.6	299.4	427.6
Sj_Blaster_Grouper_27054_MAP_3	LTR	Novel	3586.6	1002.1	2584.5	143	235.4	130.4	382.2	32.7	205.1	696	1761.8
Sj_Blaster_Grouper_29835_MAP_3	LTR	Novel	3586.4	2357.5	1228.9	1065	396.5	472.8	269.2	290.5	186	529.2	377.2
Sj_Blaster_Grouper_33857_MAP_4	LTR	Novel	3586.4	2183	1403.4	256.4	196.9	314.4	179.6	174.1	45.2	1438.1	981.7
Sj_Blaster_Grouper_27615_MAP_14	LTR	Novel	3585.1	1930.8	1654.3	962	858.2	549.1	339.8	194	224.2	225.7	232.1
Sj_Blaster_Grouper_22834_MAP_3	LTR	Novel	3583.1	2325.1	1258	260.7	171.7	341.2	161.9	190.9	42.2	1532.3	882.2
Sj_Blaster_Grouper_32222_MAP_4	LTR	NONAUT-5_1p	3581.8	1256.5	2325.3	384.3	1042.5	297.7	449.2	189.1	299.8	385.4	533.8
Sj_Blaster_Grouper_24824_MAP_3	LTR	Novel	3581.7	1452.9	2128.8	830.1	887.4	256.8	644.2	99.5	205.9	266.5	391.3
Sj_Blaster_Grouper_11816_MAP_5	LTR	Novel	3581.4	779	2802.4	370.7	680	162.3	1251.1	119.3	477.9	126.7	393.4
Sj_Blaster_Grouper_29407_MAP_5	LTR	Novel	3580.7	1542.8	2037.9	771.1	804.1	304.3	592.1	131.2	210.8	336.2	430.9
Sj_Blaster_Grouper_7105_MAP_9	LTR	Novel	3579.9	1811.6	1768.3	510.7	847.8	550.1	298.6	386.9	349	363.9	272.9
Sj_Blaster_Grouper_26382_MAP_8	LTR	Novel	3579	2307.4	1271.6	960	364.3	478.2	287.4	319.7	216.4	549.5	403.5
Sj_Blaster_Grouper_25069_MAP_17	LTR	Novel	3576.6	1645.4	1931.2	858.1	974.6	336.4	541.6	224	194	226.9	221
Sj_Blaster_Grouper_29188_MAP_3	LTR	Novel	3576.3	2016.1	1560.2	780	594.4	392.7	347.2	396.5	276.6	446.9	342
Sj_Blaster_Grouper_30226_MAP_3	LTR	Novel	3575.6	1614.5	1961.1	848.5	986.6	325.9	547.6	219.3	195.4	220.8	231.5
Sj_Blaster_Grouper_18671_MAP_3	LTR	Novel	3574.6	1004.5	2570.1	142.9	238.5	131.8	375.2	33.1	206.4	696.7	1750
Sj_Blaster_Grouper_17998_MAP_5	LTR	Novel	3572.9	1243.1	2329.8	361.4	1000.6	287.3	456.1	193.3	317	401.1	556.1
Sj_Blaster_Grouper_27848_MAP_10	LTR	Novel	3571.5	1654.9	1916.6	857.1	962.6	340.3	539.6	225.7	193.2	231.8	221.2
Sj_Blaster_Grouper_22700_MAP_6	LTR	Novel	3568	1905.7	1662.3	956.8	856.1	539.1	345.9	190.7	227.9	219.1	232.4
Sj_Blaster_Grouper_10897_MAP_20	LTR	Novel	3567.4	2239.1	1328.3	837.6	245.5	488.2	389.3	547.6	408.1	365.7	285.4
Sj_Blaster_Recon_2892_MAP_17	LTR	BEL1-I_AG-ORF1p	3565.1	861.4	2703.7	314	1053.9	236.7	839.5	130.4	361.7	180.3	448.6
Sj_Blaster_Grouper_20165_MAP_17	LTR	Novel	3563.5	2023.4	1540.1	801.3	608.2	376.8	346.5	422.2	266.7	423.1	318.7
Sj_Blaster_Grouper_32458_MAP_5	LTR	Novel	3558.1	2283	1275.1	1065.9	435.5	460.3	305.7	269.8	174.4	487	359.5
Sj_Blaster_Grouper_33708_MAP_3	LTR	Novel	3552.7	2433.3	1119.4	244.9	160.6	339	145.8	189.7	37	1659.7	776
Sj_Blaster_Grouper_25883_MAP_20	LTR	SACI-7_2p	3551.7	1939.8	1611.9	761.7	802.2	608.1	354.1	193.8	165	376.2	290.6
Sj_Blaster_Grouper_29297_MAP_19	LTR	Novel	3551.6	2194.7	1356.9	900.6	717.2	656.3	250.7	215.7	109.4	422.1	279.6
Sj_Blaster_Grouper_31170_MAP_15	LTR	Novel	3551.3	1624.5	1926.8	842.4	971.1	334.2	541	223	194.2	224.9	220.5
Sj_Blaster_Grouper_16422_MAP_12	LTR	Novel	3550.9	2465.4	1085.5	959.3	448.9	784.7	261.1	311.6	168.6	409.8	206.9
Sj_Blaster_Grouper_29046_MAP_3	LTR	Novel	3548.3	1829.3	1719	727.8	828.6	569.7	386.1	181.1	173.3	350.7	331
Sj_Blaster_Grouper_25672_MAP_15	LTR	Novel	3547.8	1911.7	1636.1	719.3	796.4	582.3	359.7	207.4	170.2	402.7	309.8
Sj_Blaster_Grouper_31556_MAP_3	LTR	Novel	3547.8	1935.9	1611.9	740.1	721.7	605.2	385.3	192.5	175.9	398.1	329
Sj_Blaster_Grouper_22591_MAP_4	LTR	Novel	3545.6	1670.1	1875.5	857.7	953	349.7	522.1	230.4	186.4	232.3	214
Sj_Blaster_Grouper_20396_MAP_6	LTR	Novel	3543.4	1497.6	2045.8	552.7	809.1	332.7	380.7	264	400.8	348.2	455.2
Sj_Blaster_Grouper_23639_MAP_16	LTR	Novel	3542.6	1653	1889.6	839.2	692.4	362.7	603.2	138.4	202.2	312.7	391.8
Sj_Blaster_Grouper_25358_MAP_3	LTR	Novel	3540.6	1893.8	1646.8	958.2	861.2	531.4	335.3	190.4	223.1	213.8	227.2
Sj_Blaster_Grouper_24436_MAP_10	LTR	Novel	3539.8	1266.6	2273.2	458.3	955.6	253.6	389.1	105.8	215	448.9	713.5
Sj_Blaster_Grouper_29458_MAP_3	LTR	GYPSY54_AG2p	3539.7	1130.4	2409.3	351.2	819.3	335.8	561.5	173.3	381.6	270.1	646.9
Sj_Blaster_Grouper_30943_MAP_6	LTR	Novel	3539.4	1628.9	1910.5	846.3	954.9	334.1	545.9	222.3	190.4	226.2	219.3
Sj_Blaster_Grouper_25940_MAP_6	LTR	Novel	3533.6	1385.2	2148.4	713.4	865.1	271.2	655.5	114.5	212.2	286.1	415.6
Sj_Blaster_Grouper_29612_MAP_6	LTR	Novel	3532.7	2384	1148.7	1071.1	366	468.3	262.2	297.2	176.7	547.4	343.8
Sj_Blaster_Grouper_24796_MAP_13	LTR	Novel	3531.9	1632.6	1899.3	848.5	957	334.8	533.7	222.7	191.4	226.6	217.2
Sj_Blaster_Grouper_25797_MAP_3	LTR	Novel	3531.6	1121.3	2410.3	156.2	247.8	146.2	349.3	37.9	190.8	781	1622.4
Sj_Blaster_Grouper_32890_MAP_14	LTR	Novel	3531.5	1980.1	1551.4	768.5	786.5	628.7	333.5	200.1	152.2	382.8	279.2
Sj_Blaster_Grouper_24845_MAP_3	LTR	Novel	3530.8	2101.5	1429.3	853.6	774.6	635.6	262.2	209.3	109	403	283.5
Sj_Blaster_Grouper_33247_MAP_3	LTR	Novel	3528.6	2366.3	1162.3	245.9	159	356.5	151	195.1	39	1568.8	813.3
Sj_Blaster_Grouper_13594_MAP_3	LTR	Novel	3527.5	1322.5	2205	740	712.2	200.5	584.6	114.1	288.4	267.9	619.8
Sj_Blaster_Grouper_28982_MAP_3	LTR	Novel	3525.5	2292.7	1232.8	1028	390.4	454	292.9	296.3	191.8	514.4	357.7
Sj_Blaster_Grouper_11799_MAP_20	LTR	Novel	3524.3	1317.8	2206.5	240.2	826	385.5	482.1	407.8	538.3	284.3	360.1
Sj_Blaster_Grouper_27396_MAP_3	LTR	Novel	3522.4	1660.6	1861.8	643.5	939.2	512.1	422.2	172.3	174.1	332.7	326.3
Sj_Blaster_Grouper_26904_MAP_7	LTR	Novel	3521.9	1893.7	1628.2	947.7	838.7	538.4	337.7	189.5	222.4	218.1	229.4
Sj_Blaster_Grouper_28101_MAP_4	LTR	Novel	3520.7	1068.8	2451.9	326.6	1019.4	297.1	559.5	166.1	295.1	279	577.9
Sj_Blaster_Grouper_23087_MAP_20	LTR	Novel	3517.7	1021	2496.7	372.5	822.3	218.6	457.6	114	414.7	315.9	802.1
Sj_Blaster_Grouper_30077_MAP_3	LTR	Novel	3516.9	2123.8	1393.1	611.6	473.5	505.4	271.2	340.5	216.8	666.3	431.6
Sj_Blaster_Grouper_20015_MAP_4	LTR	Novel	3514.9	2352.9	1162	242.1	164.5	349.8	153.3	193.2	38.7	1567.8	805.5
Sj_Blaster_Grouper_27691_MAP_4	LTR	Novel	3508.4	1997.4	1511	776.2	804.5	599.8	288.3	209.5	114.5	411.9	303.7
Sj_Blaster_Grouper_25195_MAP_4	LTR	Novel	3507.2	2476.4	1030.8	1275.3	461.4	377.2	167.2	81.3	23.1	742.6	379.1
Sj_Blaster_Grouper_29636_MAP_3	LTR	Novel	3506.6	2105.9	1400.7	867.2	700.8	634.1	274.9	196.1	119.5	408.5	305.5
Sj_Blaster_Grouper_27477_MAP_3	LTR	Novel	3503.6	1048.9	2454.7	143.4	240.9	136.4	362.5	35.2	200	733.9	1651.3
Sj_Blaster_Grouper_19110_MAP_19	LTR	Novel	3500.4	1599.1	1901.3	824.7	948	331.1	543.6	221.1	192.1	222.2	217.6
Sj_Blaster_Grouper_25206_MAP_4	LTR	Novel	3500.4	2084.7	1415.7	923.8	410	440	334.7	268.3	227	452.6	444
Sj_Blaster_Grouper_29601_MAP_3	LTR	Novel	3500.3	2475.7	1024.6	236.2	141.7	377.1	133.9	200.2	34.2	1662.2	714.8
Sj_Blaster_Grouper_22462_MAP_3	LTR	Novel	3496	2151.7	1344.3	881.8	732.9	649.4	235.4	212.4	105.6	408.1	270.4
Sj_Blaster_Grouper_27614_MAP_3	LTR	Novel	3494.8	1521.6	1973.2	765.9	749.9	285	594.6	148.5	208.1	322.2	420.6
Sj_Blaster_Grouper_29981_MAP_3	LTR	Novel	3494.6	1976.6	1518	989.9	609.2	429.6	465.6	193.2	148.5	363.9	294.7
Sj_Blaster_Grouper_27940_MAP_3	LTR	Novel	3494.3	2099.8	1394.5	894.7	360.7	450.8	450.3	399.6	297.5	354.7	286
Sj_Blaster_Grouper_20976_MAP_20	LTR	Novel	3492.5	1603.1	1889.4	825.3	947.4	331.9	535.8	222	189.6	223.9	216.6
Sj_Blaster_Grouper_30597_MAP_20	LTR	Novel	3490.4	1599.9	1890.5	826.3	946.7	330.4	536.2	220.8	190.9	222.4	216.7
Sj_Blaster_Grouper_30926_MAP_3	LTR	Novel	3489.8	2365.3	1124.5	1088.9	427.8	379.4	190.5	174.2	75.2	722.8	431
Sj_Blaster_Grouper_23149_MAP_3	LTR	Novel	3489.7	1594.7	1895	835.5	957.2	323.9	534	217.1	190.5	218.2	213.3
Sj_Blaster_Grouper_28714_MAP_20	LTR	Novel	3487	1247.2	2239.8	413.8	1030.4	279.9	433.4	187.3	266.5	366.2	509.5
Sj_Blaster_Grouper_30591_MAP_20	LTR	Novel	3486.5	1602.4	1884.1	825	943.5	332.4	535.3	221.1	188.8	223.9	216.5
Sj_Blaster_Grouper_23874_MAP_6	LTR	Novel	3484.4	1863.8	1620.6	959.5	583.1	390.8	515.8	177.2	178.3	336.3	343.4
Sj_Blaster_Grouper_27704_MAP_3	LTR	Novel	3484.4	1957.7	1526.7	782.1	791.2	586.7	291.1	193.2	130.1	395.7	314.3
Sj_Blaster_Grouper_19890_MAP_20	LTR	Novel	3483.5	2371.8	1111.7	1058.7	342.7	459	233.4	306.4	192.9	547.7	342.7
Sj_Blaster_Grouper_27398_MAP_20	LTR	Novel	3482.8	1921.3	1561.5	715.4	693.1	583.5	374.5	205	176.3	417.4	317.6
Sj_Blaster_Grouper_21573_MAP_20	LTR	Novel	3482.2	1603	1879.2	829.1	942	331.1	531.6	220.8	190.2	222	215.4
Sj_Blaster_Grouper_20778_MAP_20	LTR	Novel	3481.4	2158.5	1322.9	941.6	365.4	438.8	334.7	282.1	205.5	496	417.3
Sj_Blaster_Grouper_21349_MAP_16	LTR	Novel	3480.3	1878.9	1601.4	941.8	828.4	531.6	330.5	190.1	220.6	215.4	221.9
Sj_Blaster_Piler_449.2_MAP_3	LTR	Novel	3479.5	1147.9	2331.6	463.5	1245.1	199.8	332	74	52.5	410.6	702
Sj_Blaster_Grouper_30425_MAP_3	LTR	Novel	3475.7	1819.3	1656.4	930	645.9	382.2	515.9	176.4	161	330.7	333.6
Sj_Blaster_Piler_641.16_MAP_4	LTR	Novel	3472.9	2035.3	1437.6	865.1	396.9	437.2	346.9	280.7	237.6	452.3	456.2
Sj_Blaster_Grouper_20640_MAP_3	LTR	Novel	3472.6	2523.3	949.3	236.9	126	376	121.8	201.3	32.7	1709.1	668.8
Sj_Blaster_Grouper_26312_MAP_5	LTR	Novel	3471.5	1946.8	1524.7	540.1	502.5	474.5	312.1	320.3	241.1	611.9	469
Sj_Blaster_Grouper_29015_MAP_11	LTR	Novel	3471.2	2258.4	1212.8	967	462.2	335.3	223.2	277.7	166.7	678.4	360.7
Sj_Blaster_Grouper_24408_MAP_3	LTR	Novel	3470.5	2416.1	1054.4	999.7	318.6	551.8	294.8	290.6	165	574	276
Sj_Blaster_Grouper_22657_MAP_3	LTR	Novel	3469.7	1848.8	1620.9	939.6	842.6	518.8	332	181.1	220.7	209.3	225.6
Sj_Blaster_Grouper_30404_MAP_17	LTR	Novel	3469.2	1502.5	1966.7	667.4	734.5	360.2	593.1	173.6	209.9	301.3	429.2
Sj_Blaster_Grouper_17096_MAP_20	LTR	Novel	3468.5	1873.1	1595.4	934.7	824.5	534.2	329.7	188.5	219.8	215.7	221.4
Sj_Blaster_Grouper_19611_MAP_14	LTR	Novel	3464.2	1866.9	1597.3	934.6	825.7	530	330.2	188.7	220.1	213.6	221.3
Sj_Blaster_Grouper_21890_MAP_4	LTR	Novel	3463.5	1029.5	2434	315.1	984.8	294.1	563.9	159.1	292.3	261.2	593
Sj_Blaster_Grouper_19081_MAP_6	LTR	Novel	3462.2	1864.1	1598.1	933.4	826.5	530.6	329.4	187.2	220.6	212.9	221.6
Sj_Blaster_Grouper_27908_MAP_3	LTR	Novel	3460.3	1518.7	1941.6	623.3	998.2	379.9	427.8	163.8	180.8	351.7	334.8
Sj_Blaster_Grouper_15890_MAP_7	LTR	Novel	3459.3	1272.7	2186.6	352.5	979.5	306.6	420.7	204.4	285.4	409.2	501
Sj_Blaster_Grouper_25394_MAP_5	LTR	Novel	3458.8	1438.2	2020.6	782.8	806.8	262.9	613.8	107.3	205.5	285.2	394.5
Sj_Blaster_Grouper_29590_MAP_3	LTR	Novel	3457.1	2161.8	1295.3	887.6	669.7	634.7	252.2	216.5	109.5	423	263.9
Sj_Blaster_Grouper_26767_MAP_3	LTR	Novel	3455.3	1950.5	1504.8	763.9	836.1	586.4	266.7	200.7	111.2	399.5	290.8
Sj_Blaster_Grouper_29946_MAP_3	LTR	Novel	3453.7	1598.8	1854.9	846	734.9	304.5	554.7	120.4	184.2	327.9	381.1
Sj_Blaster_Grouper_30365_MAP_20	LTR	Novel	3453.1	1581.3	1871.8	811.8	934.6	329.2	533.7	219.5	188.4	220.8	215.1
Sj_Blaster_Grouper_31498_MAP_4	LTR	Novel	3452.9	1364.2	2088.7	712.2	808.2	254.9	622.9	115.8	221.6	281.3	436
Sj_Blaster_Grouper_14120_MAP_5	LTR	Novel	3452.5	1380.5	2072	346.4	887.8	454.7	442.6	296	390.9	283.4	350.7
Sj_Blaster_Grouper_31439_MAP_17	LTR	Novel	3452.1	1479.5	1972.6	796.2	813.5	271.1	589.3	115.6	189.9	296.6	379.9
Sj_Blaster_Grouper_20271_MAP_20	LTR	Novel	3448.2	1542.8	1905.4	579.6	727.4	344	376.2	275.6	375.2	343.6	426.6
Sj_Blaster_Grouper_23334_MAP_4	LTR	Novel	3443.6	1500	1943.6	569.3	567.4	269.1	462.1	217	316.4	444.6	597.7
Sj_Blaster_Grouper_28615_MAP_20	LTR	Novel	3443.4	1940.7	1502.7	746.6	815.4	591	270.5	204.6	116.1	398.5	300.7
Sj_Blaster_Grouper_18955_MAP_5	LTR	Novel	3442.5	2338.7	1103.8	883.1	449.4	759	260.1	307.4	175.6	389.2	218.7
Sj_Blaster_Grouper_15756_MAP_20	LTR	Novel	3441.1	1858.2	1582.9	925.5	813.4	531.6	329.5	187	219.4	214.1	220.6
Sj_Blaster_Grouper_29338_MAP_3	LTR	Novel	3440.9	2016.5	1424.4	846	778.7	604	254.6	187.9	108.6	378.6	282.5
Sj_Blaster_Grouper_30007_MAP_20	LTR	Novel	3439.2	2056.5	1382.7	813.9	718	607.9	280.3	211.2	113.3	423.5	271.1
Sj_Blaster_Grouper_27649_MAP_8	LTR	Novel	3437.5	1540.2	1897.3	815.5	962.4	307.1	537.8	203.5	185.7	214.1	211.4
Sj_Blaster_Grouper_27594_MAP_3	LTR	Novel	3436.2	1522.4	1913.8	853.5	768	270.2	586.2	112	188.3	286.7	371.3
Sj_Blaster_Grouper_21238_MAP_5	LTR	Novel	3436.2	1157.6	2278.6	373	1027.9	245	430.1	186.3	285.8	353.3	534.8
Sj_Blaster_Grouper_32252_MAP_3	LTR	SACI-7_2p	3435.9	1881.7	1554.2	881.9	679.9	428	403.2	206.6	153.9	365.2	317.2
Sj_Blaster_Grouper_25333_MAP_7	LTR	Novel	3430.4	2010.3	1420.1	791	713.1	628.2	322.5	198.5	117	392.6	267.5
Sj_Blaster_Grouper_29533_MAP_7	LTR	Novel	3430.2	1588.3	1841.9	818.7	922.3	329.7	525	220	185.9	219.9	208.7
Sj_Blaster_Grouper_17634_MAP_3	LTR	Novel	3429.7	2607.3	822.4	846.9	239.8	521.2	176.9	377.1	92.4	862.1	313.3
Sj_Blaster_Grouper_18364_MAP_3	LTR	Novel	3428.7	1584	1844.7	816.4	921.7	327.7	526.7	220.2	185.7	219.7	210.6
Sj_Blaster_Grouper_17978_MAP_5	LTR	Novel	3428.6	1586.6	1842	820.7	925	327.1	524.9	219.4	183.9	219.4	208.2
Sj_Blaster_Grouper_22288_MAP_3	LTR	Novel	3428.3	1859	1569.3	937.9	820.7	524.9	318.7	187.4	217.1	208.8	212.8
Sj_Blaster_Grouper_18715_MAP_6	LTR	Novel	3427.4	1032.9	2394.5	423.3	951.8	251.7	738.3	162.7	304.6	195.2	399.8
Sj_Blaster_Grouper_27986_MAP_5	LTR	Novel	3424.1	2319.9	1104.2	237.3	153.7	341.9	144.5	187.2	37	1553.5	769
Sj_Blaster_Grouper_25182_MAP_3	LTR	Novel	3423.9	1671.2	1752.7	682.8	879.4	508.5	374.9	158.9	175.6	321	322.8
Sj_Blaster_Grouper_27215_MAP_3	LTR	Novel	3423.6	1261.9	2161.7	412.1	992.4	300.9	427.4	173.1	263.6	375.8	478.3
Sj_Blaster_Grouper_18511_MAP_20	LTR	Novel	3423.3	1799.1	1624.2	663.4	850.6	565	352.1	194.7	153.8	376	267.7
Sj_Blaster_Grouper_28534_MAP_4	LTR	Novel	3423.2	1254.2	2169	435.2	1001.9	294.2	421.7	167.3	258.5	357.5	486.9
Sj_Blaster_Grouper_19196_MAP_4	LTR	Novel	3420.8	831.6	2589.2	296.6	1005.8	233.2	802.9	126.9	351.9	174.9	428.6
Sj_Blaster_Grouper_27035_MAP_3	LTR	Novel	3418.5	1223	2195.5	366.2	953	280.5	459.5	200.3	285.9	376	497.1
Sj_Blaster_Grouper_28955_MAP_3	LTR	Novel	3418.2	1760.2	1658	892.4	587.5	375.1	537.8	169.2	180.4	323.5	352.3
Sj_Blaster_Grouper_19381_MAP_3	LTR	Novel	3417.3	1014	2403.3	314.8	1057	209.1	468.8	171.5	315.3	318.6	562.2
Sj_Blaster_Grouper_18022_MAP_4	LTR	Novel	3412	1836.3	1575.7	921.5	809.6	523.6	327.5	183.1	218.9	208.1	219.7
Sj_Blaster_Grouper_30199_MAP_3	LTR	Novel	3411.5	1872.5	1539	928	507.3	356.2	366.4	198.9	211.7	389.4	453.6
Sj_Blaster_Grouper_22675_MAP_4	LTR	Novel	3410.5	1147.3	2263.2	155.4	248.6	145	323.4	38	183.9	808.9	1507.3
Sj_Blaster_Grouper_26506_MAP_16	LTR	Novel	3410	1675.6	1734.4	645.1	818.3	518.8	394.9	175.1	186	336.6	335.2
Sj_Blaster_Grouper_31160_MAP_3	LTR	Novel	3407.8	2121.4	1286.4	1043.9	545.7	470.5	380.7	204.9	113.4	402.1	246.6
Sj_Blaster_Grouper_15565_MAP_5	LTR	Novel	3407.4	1568.2	1839.2	795.3	919.4	332.8	525.6	220.3	184.9	219.8	209.3
Sj_Blaster_Grouper_26323_MAP_6	LTR	Novel	3407.4	1179.3	2228.1	370.2	1009.4	272.3	438.1	181.6	286.9	355.2	493.7
Sj_Blaster_Grouper_30412_MAP_3	LTR	Novel	3405.6	1927.5	1478.1	1016.7	620.4	415	367	178.4	150.2	317.4	340.5
Sj_Blaster_Grouper_18939_MAP_3	LTR	Novel	3404.4	1822.9	1581.5	925.5	814.8	512.2	327.3	180	218.5	205.2	220.9
Sj_Blaster_Grouper_27145_MAP_12	LTR	Novel	3404.2	1617.9	1786.3	800.5	643	358.7	577.8	159.7	193.8	299	371.7
Sj_Blaster_Grouper_13104_MAP_20	LTR	Novel	3403.9	1835.7	1568.2	914.1	802.6	526.3	327.8	185.1	218.8	210.2	219
Sj_Blaster_Grouper_24817_MAP_7	LTR	Novel	3402.7	1424.8	1977.9	463.1	551.8	286.3	478.3	226.9	314.3	448.5	633.5
Sj_Blaster_Grouper_18863_MAP_3	LTR	Novel	3401.3	1102.6	2298.7	153.4	235.4	145	341	37.1	184.6	767.1	1537.7
Sj_Blaster_Grouper_25842_MAP_10	LTR	Novel	3397.8	1575.3	1822.5	786.2	734.6	348.6	493.9	161.4	191	279.1	403
Sj_Blaster_Piler_600.16_MAP_3	LTR	Novel	3394.4	1420.4	1974	394.4	850.1	342	426.9	233.6	263.3	450.4	433.7
Sj_Blaster_Grouper_24274_MAP_18	LTR	Novel	3393.7	2076.5	1317.2	830.8	716.5	639.8	231.9	207.1	102.4	398.8	266.4
Sj_Blaster_Grouper_14641_MAP_17	LTR	Novel	3390.7	1549.5	1841.2	807.6	917.9	315.4	527.2	215.8	184.4	210.7	211.7
Sj_Blaster_Grouper_23969_MAP_4	LTR	Novel	3389.1	1584	1805.1	679.6	797.4	396.2	392.2	161.6	233	346.6	382.5
Sj_Blaster_Grouper_26110_MAP_3	LTR	Novel	3388.1	1720.5	1667.6	892.7	853.6	474.1	344.3	165.1	241.4	188.6	228.3
Sj_Blaster_Grouper_28909_MAP_3	LTR	Novel	3387.4	1620.6	1766.8	684.1	884.5	464.4	385.8	151.5	173.5	320.6	323
Sj_Blaster_Grouper_25122_MAP_8	LTR	Novel	3384.9	1599	1785.9	787.6	690.6	353.9	568	158.4	174	299.1	353.3
Sj_Blaster_Grouper_29069_MAP_5	LTR	Novel	3384.1	2016.4	1367.7	963.5	474.3	388.3	319.3	234.4	177.8	430.2	396.3
Sj_Blaster_Grouper_31031_MAP_3	LTR	Novel	3383.7	2083.4	1300.3	1031.8	480.8	409.4	303.2	225.5	175.7	416.7	340.6
Sj_Blaster_Grouper_12001_MAP_20	LTR	Novel	3380.7	1257.3	2123.4	343.4	952.4	307.9	411.3	202.1	276	403.9	483.7
Sj_Blaster_Grouper_28604_MAP_3	LTR	Novel	3376.8	1620.4	1756.4	598.6	906.2	514.8	367.3	169.5	170.7	337.5	312.2
Sj_Blaster_Grouper_19551_MAP_6	LTR	Novel	3373.6	1206.7	2166.9	259	901	362.4	448.7	335.6	507.4	249.7	309.8
Sj_Blaster_Grouper_28261_MAP_3	LTR	Novel	3372.2	1117	2255.2	347.6	1032.2	245.4	437.1	181.5	276.6	342.5	509.3
Sj_Blaster_Grouper_32430_MAP_3	LTR	Novel	3371.2	1238.6	2132.6	440.2	913.1	234.9	363.1	96.7	200.8	466.8	655.6
Sj_Blaster_Grouper_30092_MAP_3	LTR	Novel	3370.3	1481	1889.3	721.5	953.9	359.8	420.2	121.2	179.3	278.5	335.9
Sj_Blaster_Grouper_27605_MAP_3	LTR	Novel	3368.9	1349.2	2019.7	684.3	839.6	255.4	595.9	112.9	195.5	296.6	388.7
Sj_Blaster_Grouper_27840_MAP_10	LTR	Novel	3368.5	2115.8	1252.7	968.7	436.3	452.5	305.6	253.8	162	440.8	348.8
Sj_Blaster_Grouper_24698_MAP_4	LTR	Novel	3367.2	2185.9	1181.3	957.1	382.8	434.2	270.8	281.4	161.4	513.2	366.3
Sj_Blaster_Grouper_24736_MAP_8	LTR	Novel	3364	1599.3	1764.7	530	691.3	405.1	351.8	247.5	298.5	416.7	423.1
Sj_Blaster_Grouper_25559_MAP_3	LTR	Novel	3361.7	1084.6	2277.1	160	223.7	143	321.7	34.5	183.9	747.1	1547.8
Sj_Blaster_Grouper_29047_MAP_3	LTR	Novel	3361	2046.6	1314.4	1020.2	554.6	437.3	396.4	201	125.2	388.1	238.2
Sj_Blaster_Grouper_26688_MAP_4	LTR	Novel	3359.8	1387.6	1972.2	743.6	789.3	254.9	585.2	111	198.6	278.1	399.1
Sj_Blaster_Grouper_29709_MAP_3	LTR	Novel	3358.7	2287.9	1070.8	230.8	151.4	334	140.2	184.4	35.4	1538.7	743.8
Sj_Blaster_Grouper_23884_MAP_6	LTR	Novel	3358.2	2303.2	1055	764.5	363.8	410.4	206.1	364.2	113.8	764.1	371.3
Sj_Blaster_Grouper_13978_MAP_3	LTR	Novel	3358	1535.2	1822.8	795.8	909.9	314.9	522.5	215.3	182.4	209.2	208
Sj_Blaster_Grouper_11848_MAP_15	LTR	Novel	3357.8	1536.7	1821.1	796.6	908.3	314.9	522.5	215.5	182.4	209.7	207.9
Sj_Blaster_Grouper_21219_MAP_3	LTR	Novel	3357.4	2132.7	1224.7	245	172.1	302.3	158.9	172.5	40.9	1412.9	852.8
Sj_Blaster_Grouper_28099_MAP_3	LTR	Novel	3357.3	1644	1713.3	627.2	859.3	516.5	377.9	165.2	169	335.1	307.1
Sj_Blaster_Grouper_22538_MAP_13	LTR	Novel	3356.5	1539.9	1816.6	513.4	698.4	382	369.9	260.1	340.7	384.4	407.6
Sj_Blaster_Grouper_27390_MAP_3	LTR	Novel	3355.6	2203.7	1151.9	235.4	162.4	326	151.8	182.3	38.5	1460	799.2
Sj_Blaster_Grouper_27136_MAP_4	LTR	GYPSY2_AGp	3353.5	1945.9	1407.6	887.2	578.6	363.5	349.7	277.5	160.3	417.7	319
Sj_Blaster_Grouper_19902_MAP_9	LTR	Novel	3351.7	1003.4	2348.3	414.4	976	236.3	715	161.1	287.6	191.6	369.7
Sj_Blaster_Grouper_14998_MAP_5	LTR	Novel	3351.7	1567.9	1783.8	804.9	902.9	326.8	505	217.8	176.3	218.4	199.6
Sj_Blaster_Grouper_30561_MAP_3	LTR	Novel	3350.1	2366.5	983.6	227.8	127.6	356.4	131.4	181.7	32.3	1600.6	692.3
Sj_Blaster_Grouper_29082_MAP_3	LTR	Novel	3347.8	1372.2	1975.6	487.2	962.1	317.9	400.1	183.6	214.1	383.5	399.3
Sj_Blaster_Grouper_23080_MAP_9	LTR	Novel	3347.2	1495.4	1851.8	798.7	940	293.3	525.6	197.7	181.8	205.7	204.4
Sj_Blaster_Grouper_19903_MAP_4	LTR	Novel	3346.9	1264.6	2082.3	367.3	950.6	318.7	407.4	193.2	268	385.4	456.3
Sj_Blaster_Grouper_28785_MAP_3	LTR	Novel	3345.1	1315.7	2029.4	378.4	555.7	239.9	398.2	223.6	380.8	473.8	694.7
Sj_Blaster_Grouper_29290_MAP_8	LTR	Novel	3343.8	1330.5	2013.3	671.2	823.9	254.9	613.9	113.2	196.1	291.2	379.4
Sj_Blaster_Grouper_18560_MAP_11	LTR	Novel	3341.1	1325.2	2015.9	543	800.3	299	376	230.7	420.1	252.5	419.5
Sj_Blaster_Grouper_14334_MAP_4	LTR	Novel	3339	1490.2	1848.8	766.5	920.1	312.6	528.6	207.9	187	203.2	213.1
Sj_Blaster_Grouper_32378_MAP_7	LTR	Novel	3338.9	2275.5	1063.4	1007	360.2	454	236.2	289.4	153.1	525.1	313.9
Sj_Blaster_Grouper_27760_MAP_10	LTR	Novel	3338.6	1655.1	1683.5	685.9	816.7	460.2	376.3	167.1	170.9	341.9	319.6
Sj_Blaster_Grouper_34015_MAP_10	LTR	Novel	3336.7	1320.5	2016.2	410.2	906.1	333.4	412.1	174.4	253.2	402.5	444.8
Sj_Blaster_Grouper_22247_MAP_3	LTR	Novel	3336.6	1567.8	1768.8	769.4	647.2	346	542	160.6	194.6	291.8	385
Sj_Blaster_Grouper_21374_MAP_20	LTR	Novel	3335.7	1003.5	2332.2	449.4	1241.7	160.9	332.1	20.9	54.3	372.3	704.1
Sj_Blaster_Grouper_27170_MAP_5	LTR	Novel	3334.8	1203.3	2131.5	464.3	967.7	278.3	439.9	156.7	250.2	304	473.7
Sj_Blaster_Grouper_28441_MAP_4	LTR	Novel	3334.6	2042.8	1291.8	978.6	495.1	401.9	284.9	226.9	167.3	435.4	344.5
Sj_Blaster_Grouper_33075_MAP_6	LTR	Novel	3333.9	1512.3	1821.6	1069.3	694.5	139.3	491.8	134	289.4	169.7	345.9
Sj_Blaster_Grouper_27855_MAP_3	LTR	Novel	3329.8	2274.2	1055.6	232.5	143.3	338.9	135.3	183.9	35.7	1518.9	741.3
Sj_Blaster_Grouper_27692_MAP_5	LTR	Novel	3326.4	1486.1	1840.3	727.5	732.1	334.7	579.4	154.8	176.8	269.1	352
Sj_Blaster_Grouper_27785_MAP_7	LTR	Novel	3325.8	3268.7	57.1	82.6	4.9	987.5	15.1	867.1	24.9	1331.5	12.2
Sj_Blaster_Grouper_34722_MAP_3	LTR	SACI-7_2p	3325.5	1467.7	1857.8	662.1	917.9	364.6	402.5	136.5	190.8	304.5	346.6
Sj_Blaster_Grouper_21868_MAP_3	LTR	Novel	3323.4	1086.5	2236.9	154.7	232.3	140.7	318.3	36.2	178.4	754.9	1507.9
Sj_Blaster_Grouper_27973_MAP_3	LTR	Novel	3320.5	1857.8	1462.7	945.1	788.1	526	283.5	182.7	194.6	204	196.5
Sj_Blaster_Grouper_23324_MAP_11	LTR	Novel	3320.5	1553.4	1767.1	509.5	682.4	386.8	367.6	252.1	300.6	405	416.5
Sj_Blaster_Grouper_28276_MAP_6	LTR	Novel	3320.5	1065.6	2254.9	145.2	237.4	136.4	327.2	35.9	182.5	748.1	1507.8
Sj_Blaster_Grouper_29635_MAP_4	LTR	Novel	3320	922.8	2397.2	132.4	225.7	120.4	317.3	30.2	187.9	639.8	1666.3
Sj_Blaster_Grouper_22613_MAP_3	LTR	Novel	3319.6	2244.7	1074.9	810.3	327.9	567.2	300.8	280.1	166	587.1	280.2
Sj_Blaster_Grouper_26835_MAP_4	LTR	Novel	3319.1	2314.7	1004.4	792.2	308.2	616.7	286.2	301.4	155.3	604.4	254.7
Sj_Blaster_Grouper_28719_MAP_6	LTR	Novel	3318.8	2143.2	1175.6	1031.4	407.4	434.4	273.8	233.2	169.1	444.2	325.3
Sj_Blaster_Grouper_21558_MAP_18	LTR	Novel	3317.4	981.8	2335.6	310	1032.4	219.7	461.8	158.9	298.7	293.2	542.7
Sj_Blaster_Grouper_20752_MAP_3	LTR	Novel	3312.8	1459.8	1853	767.3	936.5	291.4	531.2	197.8	181.7	203.3	203.6
Sj_Blaster_Grouper_16034_MAP_3	LTR	Novel	3312.4	2184.6	1127.8	965.4	329.8	436	262.6	286.3	172	496.9	363.4
Sj_Blaster_Grouper_25389_MAP_14	LTR	Novel	3311.1	1934	1377.1	990.2	553.5	437.3	376.9	179.2	143.4	327.3	303.3
Sj_Blaster_Grouper_22460_MAP_3	LTR	Novel	3310.5	1093.4	2217.1	148.2	232.3	141.4	317.8	36.7	175.7	767.1	1491.3
Sj_Blaster_Grouper_23905_MAP_3	LTR	Novel	3309.2	1534.3	1774.9	704.5	640	359.3	542.7	171.6	198.4	298.9	393.8
Sj_Blaster_Grouper_25742_MAP_17	LTR	Novel	3308.2	1708.8	1599.4	825.8	601.8	376.7	514.8	180.3	164.1	326	318.7
Sj_Blaster_Grouper_31898_MAP_4	LTR	Novel	3308.2	2245.5	1062.7	229.5	147.7	329.8	137.4	176.5	34.8	1509.7	742.8
Sj_Blaster_Grouper_32296_MAP_3	LTR	Novel	3307.8	2255.7	1052.1	1063.6	377.1	504.3	260	248.7	135.2	439.1	279.8
Sj_Blaster_Grouper_22050_MAP_3	LTR	Novel	3304.9	1433.9	1871	749.7	946.7	295.4	532.3	188	184.2	200.8	207.8
Sj_Blaster_Grouper_17642_MAP_5	LTR	Novel	3300.8	1393.8	1907	535	744.9	301.4	356.6	250.7	398.7	306.7	406.8
Sj_Blaster_Grouper_25771_MAP_3	LTR	Novel	3300.1	1656.7	1643.4	730.7	653.8	360.4	416.1	233.5	200.6	332.1	372.9
Sj_Blaster_Grouper_19514_MAP_3	LTR	Novel	3299.1	1775.6	1523.5	669.6	490.7	365.2	388.6	340.2	256.6	400.6	387.6
Sj_Blaster_Grouper_21919_MAP_10	LTR	Novel	3297.5	1050.3	2247.2	302	979.5	221.6	416.1	194.6	300.8	332.1	550.8
Sj_Blaster_Grouper_33200_MAP_16	LTR	Novel	3296.1	1177.8	2118.3	405.7	1015.3	191.9	281.6	161.1	243.6	419.1	577.8
Sj_Blaster_Grouper_19181_MAP_3	LTR	Novel	3295.2	1373	1922.2	377.7	839.3	343.9	405.4	219.8	258.5	431.6	419
Sj_Blaster_Grouper_27646_MAP_4	LTR	Novel	3294.5	2242.1	1052.4	1056.8	358.9	471.5	267.7	252.5	147	461.3	278.8
Sj_Blaster_Grouper_28961_MAP_3	LTR	Novel	3293.8	1943.8	1350	804.1	682	577.7	260.7	190.1	117	371.9	290.3
Sj_Blaster_Grouper_29108_MAP_3	LTR	Novel	3292.8	1885.4	1407.4	1023.9	690	381.2	393.9	229.5	147.5	250.8	176
Sj_Blaster_Grouper_21125_MAP_3	LTR	Novel	3292.6	992.9	2299.7	441.3	1211.8	159.2	337.5	21.8	56.5	370.6	693.9
Sj_Blaster_Grouper_18765_MAP_10	LTR	Novel	3290.1	939.8	2350.3	285.2	1015.7	189.2	463.3	167.8	310	297.6	561.3
Sj_Blaster_Grouper_15651_MAP_4	LTR	Novel	3290	1210.8	2079.2	334.9	930.3	292.6	414.1	192.5	266.7	390.8	468.1
Sj_Blaster_Grouper_34662_MAP_5	LTR	Novel	3289.5	3233	56.5	81.6	4.9	983.6	15.3	852.5	24.7	1315.3	11.6
Sj_Blaster_Grouper_28791_MAP_3	LTR	Novel	3289	1296.5	1992.5	710.3	846.2	245.9	607.5	95.3	177.4	245	361.4
Sj_Blaster_Grouper_21253_MAP_20	LTR	Novel	3288.3	2091.7	1196.6	850.1	644.2	647.5	213	204.6	91.9	389.5	247.5
Sj_Blaster_Grouper_29052_MAP_3	LTR	Novel	3288	2107.5	1180.5	1000.1	424.3	413.5	257.9	238.8	166.7	455.1	331.6
Sj_Blaster_Grouper_18055_MAP_5	LTR	Novel	3287.6	1961.1	1326.5	848.1	335.4	414.1	331.9	263.6	224.3	435.3	434.9
Sj_Blaster_Grouper_27878_MAP_7	LTR	Novel	3287.1	1863.9	1423.2	712.5	777.1	570.5	258.2	196.3	104.4	384.6	283.5
Sj_Blaster_Grouper_26106_MAP_7	LTR	Novel	3284.7	1675.4	1609.3	798.3	669.4	374.4	479.4	177.6	158.3	325.1	302.2
Sj_Blaster_Grouper_33239_MAP_3	LTR	NONAUT-3_1p	3284	1802.7	1481.3	563.6	526.9	405.4	296.3	290.7	219.6	543	438.5
Sj_Blaster_Grouper_22493_MAP_3	LTR	Novel	3283.3	993.2	2290.1	436.8	1205.6	163.5	340.1	25.8	61.9	367.1	682.5
Sj_Blaster_Grouper_19788_MAP_14	LTR	Novel	3281.4	1100.8	2180.6	304.2	921.2	303.7	476.6	239.1	397.2	253.8	385.6
Sj_Blaster_Grouper_25171_MAP_3	LTR	Novel	3279.5	2069.7	1209.8	828.7	636.6	643.7	219.7	206.4	96.7	390.9	256.8
Sj_Blaster_Grouper_25624_MAP_3	LTR	Novel	3279.1	998.4	2280.7	445.4	1178.9	165.4	339.5	25.4	77.1	362.2	685.2
Sj_Blaster_Grouper_23878_MAP_19	LTR	Novel	3278.6	2087	1191.6	822.2	645	615.3	215.4	221.9	96.3	427.6	234.9
Sj_Blaster_Grouper_29233_MAP_3	LTR	Novel	3277.8	1320.7	1957.1	662.1	762.9	256.5	594.8	116	203.4	286.1	396
Sj_Blaster_Piler_384.241_MAP_3	LTR	Novel	3277.4	1796.8	1480.6	907.2	762.8	506.5	309.5	178.9	206.8	204.2	201.5
Sj_Blaster_Grouper_20064_MAP_3	LTR	Novel	3277.2	1078.9	2198.3	158.7	217	142.6	314.4	34.2	177.4	743.4	1489.5
Sj_Blaster_Grouper_26893_MAP_12	LTR	Novel	3275.1	1327.6	1947.5	483.8	933.9	334.6	404.3	159.3	224	349.9	385.3
Sj_Blaster_Grouper_35100_MAP_3	LTR	Novel	3274.8	2279.3	995.5	228.4	136.9	305.8	123.3	176.9	31.1	1568.2	704.2
Sj_Blaster_Grouper_28476_MAP_20	LTR	Novel	3273.4	1129.9	2143.5	431.4	1009	241.7	423.5	153.5	251.4	303.3	459.6
Sj_Blaster_Grouper_18891_MAP_20	LTR	Novel	3273.1	883.2	2389.9	280	784.1	190.7	459.4	102.8	392.5	309.7	753.9
Sj_Blaster_Grouper_24870_MAP_4	LTR	Novel	3272.9	2323.6	949.3	213.1	140.3	342.7	123.9	187.1	31.5	1580.7	653.6
Sj_Blaster_Grouper_20357_MAP_3	LTR	Novel	3271.7	2263.9	1007.8	991.9	295.9	451.6	210.5	299.2	175.1	521.2	326.3
Sj_Blaster_Grouper_26632_MAP_6	LTR	Novel	3268.9	1791.3	1477.6	652.7	717.8	567.8	323.6	192.4	155.7	378.4	280.5
Sj_Blaster_Grouper_28938_MAP_3	LTR	Novel	3265.8	1529.9	1735.9	508.2	641.1	385	369.9	247.2	322.5	389.5	402.4
Sj_Blaster_Grouper_11972_MAP_3	LTR	Novel	3264.9	1164	2100.9	315.5	421	222.1	421.4	140	366.4	486.4	892.1
Sj_Blaster_Grouper_7587_MAP_3	LTR	Novel	3264.2	1426.6	1837.6	688.1	538	229.8	552.7	298.5	393.5	210.2	353.4
Sj_Blaster_Grouper_20562_MAP_5	LTR	Novel	3262.1	1842.1	1420	931.3	762.2	516.2	285.6	185.4	187.4	209.2	184.8
Sj_Blaster_Grouper_29396_MAP_3	LTR	Novel	3261.4	1880.8	1380.6	709.6	713.3	545.6	258.4	208.7	136.2	416.9	272.7
Sj_Blaster_Grouper_24365_MAP_3	LTR	Novel	3258.7	2373.4	885.3	230.1	123.1	342.4	115.9	181.1	30.5	1619.8	615.8
Sj_Blaster_Grouper_25111_MAP_20	LTR	Novel	3258.4	1987.1	1271.3	782.7	641.1	607.8	245.4	203.1	107.2	393.5	277.6
Sj_Blaster_Grouper_21142_MAP_3	LTR	Novel	3255.8	1394	1861.8	471.9	711.4	337.5	382	221	339.8	363.6	428.6
Sj_Blaster_Grouper_26983_MAP_9	LTR	Novel	3255.6	2025.2	1230.4	964.1	475.5	438	278.7	223.2	148.7	399.9	327.5
Sj_Blaster_Grouper_25113_MAP_3	LTR	Novel	3254.6	2017.1	1237.5	750.8	433.8	382.4	246.9	218.4	99.6	665.5	457.2
Sj_Blaster_Piler_248.51_MAP_7	LTR	Novel	3253.8	1785.4	1468.4	732	874.9	547.2	242.2	173.4	94	332.8	257.3
Sj_Blaster_Grouper_5629_MAP_3	LTR	Novel	3250.1	1731.4	1518.7	847.5	835.9	514.3	298.3	173.3	203.8	196.3	180.7
Sj_Blaster_Grouper_28886_MAP_3	LTR	Novel	3250.1	1249	2001.1	640.8	754.7	244	628.1	99.9	205.9	264.3	412.4
Sj_Blaster_Grouper_21736_MAP_4	LTR	Novel	3249	1937	1312	838.1	332.2	411.9	332.3	259.1	221	427.9	426.5
Sj_Blaster_Grouper_27914_MAP_3	LTR	Novel	3248.8	1341	1907.8	691.9	718.8	256	581.1	109.5	207.2	283.6	400.7
Sj_Blaster_Grouper_29331_MAP_4	LTR	Novel	3248.2	2004.4	1243.8	799.9	663.6	613.3	220.5	202.9	100.7	388.3	259
Sj_Blaster_Grouper_29786_MAP_3	LTR	Novel	3247.6	1825.7	1421.9	899.5	606.7	402.4	472.4	182.1	120.1	341.7	222.7
Sj_Blaster_Grouper_29893_MAP_10	LTR	Novel	3244.9	2042.7	1202.2	1021.3	556	456.8	349.7	271	153.1	293.6	143.4
Sj_Blaster_Grouper_26844_MAP_3	LTR	Novel	3238.2	869.2	2369	122.9	213.7	113.2	343.2	28.7	190	604.4	1622.1
Sj_Blaster_Grouper_23367_MAP_20	LTR	SACI-7_2p	3237.8	1819.9	1417.9	695.6	705.2	555.6	333.7	195	125.1	373.7	253.9
Sj_Blaster_Grouper_25645_MAP_7	LTR	Novel	3234.2	1563.6	1670.6	577.8	810.9	507	367.6	164.9	175.9	313.9	316.2
Sj_Blaster_Grouper_24578_MAP_6	LTR	Novel	3231.6	994.2	2237.4	419.9	898.3	232	706.9	155	291.9	187.3	340.3
Sj_Blaster_Grouper_30886_MAP_4	LTR	Novel	3231	1965.3	1265.7	752.7	671.9	624.4	223.4	199.2	122.7	389	247.7
Sj_Blaster_Grouper_26152_MAP_9	LTR	Novel	3230.7	949.1	2281.6	131.7	219.7	123.5	338.9	32.4	185.3	661.5	1537.7
Sj_Blaster_Grouper_26813_MAP_5	LTR	Novel	3229	1324.5	1904.5	678.6	817	252.4	517.9	112.3	189.1	281.2	380.5
Sj_Blaster_Piler_736.51_MAP_4	LTR	Novel	3228.2	1706.3	1521.9	681.9	774.3	529	325.9	167.5	150.9	327.9	270.8
Sj_Blaster_Grouper_19700_MAP_4	LTR	Novel	3225.9	2112.8	1113.1	846.8	212.2	455.4	347.6	494.6	321.5	316	231.8
Sj_Blaster_Grouper_29840_MAP_6	LTR	Novel	3225.8	1803.7	1422.1	584.8	414.9	309	266.2	362.3	254.7	547.6	486.3
Sj_Blaster_Grouper_28445_MAP_7	LTR	Novel	3219.3	1970.3	1249	901.6	416.6	415	299.5	236	183.6	417.7	349.3
Sj_Blaster_Grouper_29699_MAP_6	LTR	Novel	3218.6	1721.2	1497.4	486.3	484.3	439.6	314.1	262.6	242.3	532.7	456.7
Sj_Blaster_Grouper_17102_MAP_7	LTR	Novel	3218.5	2080.6	1137.9	934.1	326.6	414	275.5	265.7	175.7	466.8	360.1
Sj_Blaster_Grouper_33716_MAP_12	LTR	NONAUT-5_1p	3217.5	1165.2	2052.3	416.2	925	275.7	459.2	164.8	243.3	308.5	424.8
Sj_Blaster_Grouper_24075_MAP_20	LTR	Novel	3215.3	1695.4	1519.9	625.3	744.9	541.6	341.1	180.2	152.8	348.3	281.1
Sj_Blaster_Grouper_22004_MAP_6	LTR	Novel	3215.1	2020.5	1194.6	1009.4	552.6	451.4	347.5	268.4	152.3	291.3	142.2
Sj_Blaster_Grouper_14199_MAP_9	LTR	Novel	3214.8	2437.4	777.4	947.1	284.3	775.4	212.4	308.3	117.4	406.6	163.3
Sj_Blaster_Grouper_31007_MAP_3	LTR	NONAUT-5_1p	3213.4	1814.2	1399.2	888.3	462.1	354.8	320.1	202.4	197.4	368.7	419.6
Sj_Blaster_Grouper_22785_MAP_20	LTR	Novel	3211.1	2209.9	1001.2	1165.2	447.5	320	159.9	51	21.2	673.7	372.6
Sj_Blaster_Grouper_19283_MAP_4	LTR	Novel	3210.7	1790	1420.7	652.9	680.3	551	321.5	197.4	154.3	388.7	264.6
Sj_Blaster_Grouper_20154_MAP_6	LTR	Novel	3210	1060.2	2149.8	148.7	225	138.8	313.2	35.5	176.3	737.2	1435.3
Sj_Blaster_Grouper_22844_MAP_3	LTR	Novel	3207.9	1589.9	1618	611.2	810.8	488.7	368.8	164.7	157.5	325.3	280.9
Sj_Blaster_Grouper_28568_MAP_7	LTR	Novel	3207.9	1687.7	1520.2	680.1	882.6	501.6	265.4	167.1	100.1	338.9	272.1
Sj_Blaster_Grouper_21358_MAP_4	LTR	Novel	3204.9	1814.3	1390.6	920.3	756.9	505.7	273.5	182.4	182	205.9	178.2
Sj_Blaster_Grouper_27936_MAP_3	LTR	Novel	3204.8	1761.2	1443.6	817.1	369.3	339	434.2	340.6	355.1	264.5	285
Sj_Blaster_Grouper_25955_MAP_3	LTR	Novel	3204.7	1921.6	1283.1	793.7	702.8	580.5	221	185.9	98.8	361.5	260.5
Sj_Blaster_Grouper_26696_MAP_3	LTR	Novel	3204	1444.1	1759.9	715.1	687.8	318.9	539.5	148.3	180.7	261.8	351.9
Sj_Blaster_Grouper_27312_MAP_20	LTR	Novel	3203.1	908.3	2294.8	299.4	1039.6	192.6	450.9	145.8	290.4	270.5	513.9
Sj_Blaster_Grouper_26793_MAP_3	LTR	Novel	3201.4	1933.5	1267.9	746	624.2	584.2	249.7	205.1	114.3	398.2	279.7
Sj_Blaster_Grouper_24812_MAP_3	LTR	Novel	3200.5	2073.9	1126.6	1037.8	517.6	423.7	279.3	224.2	100	388.2	229.7
Sj_Blaster_Grouper_23357_MAP_3	LTR	Novel	3200.3	1184.5	2015.8	549.7	1013.2	346.4	449.4	148.5	268.1	139.9	285.1
Sj_Blaster_Grouper_19587_MAP_10	LTR	Novel	3198.8	1309	1889.8	567.6	852.3	340	392.8	132.2	264.2	269.2	380.5
Sj_Blaster_Grouper_32641_MAP_4	LTR	Novel	3198.7	2136.6	1062.1	228	158	299.7	138.8	175.1	34.3	1433.8	731
Sj_Blaster_Grouper_14811_MAP_20	LTR	Novel	3197.9	1072.6	2125.3	305.6	951.6	261.4	415.4	164.9	279.2	340.7	479.1
Sj_Blaster_Grouper_27041_MAP_5	LTR	Novel	3197.8	2140.1	1057.7	226.3	145.9	315.9	137.5	173.9	35.7	1424	738.6
Sj_Blaster_Grouper_22868_MAP_20	LTR	Novel	3195.7	2332.1	863.6	1038.6	287.6	465.9	178.4	299.6	140.2	528	257.4
Sj_Blaster_Grouper_29920_MAP_3	LTR	Novel	3192.1	1918.1	1274	755.8	712.1	573.9	222.7	196.2	95.3	392.2	243.9
Sj_Blaster_Grouper_29150_MAP_3	LTR	Novel	3190.4	911.1	2279.3	128.7	204.7	120.6	344.1	29.3	182.5	632.5	1548
Sj_Blaster_Grouper_30107_MAP_3	LTR	Novel	3190	1934.5	1255.5	924.1	638	438.6	297.4	196.2	98.8	375.6	221.3
Sj_Blaster_Grouper_25365_MAP_5	LTR	Novel	3189.4	1437.2	1752.2	794.7	805.3	259.9	457.7	110.6	157.9	272	331.3
Sj_Blaster_Grouper_27322_MAP_5	LTR	Novel	3187.6	1412.3	1775.3	458.8	690.7	377.5	354.9	240.7	344	335.3	385.7
Sj_Blaster_Grouper_25762_MAP_3	LTR	Novel	3186	1037.2	2148.8	149.9	211.7	130	263.6	30.6	161.4	726.7	1512.1
Sj_Blaster_Grouper_21857_MAP_9	LTR	Novel	3184.8	1185.8	1999	544.4	994.7	346.4	449	153.1	266.2	141.9	289.1
Sj_Blaster_Grouper_27601_MAP_4	LTR	Novel	3184.2	1455.7	1728.5	714.2	643.6	324	548.9	149.5	180.7	268	355.3
Sj_Blaster_Grouper_27644_MAP_3	LTR	Novel	3184.1	1050.5	2133.6	279.1	911.3	293.1	465.8	232.6	385.6	245.7	370.9
Sj_Blaster_Grouper_17531_MAP_20	LTR	Novel	3180.9	1788.1	1392.8	901.8	753.3	502.6	274.8	180.4	183	203.3	181.7
Sj_Blaster_Grouper_25732_MAP_6	LTR	Novel	3180.8	1782.5	1398.3	840.2	574	327.5	349	236.2	157.9	378.6	317.4
Sj_Blaster_Grouper_32349_MAP_7	LTR	Novel	3179.7	2047.1	1132.6	981.2	416	402.6	244.7	230.6	158.3	432.7	313.6
Sj_Blaster_Grouper_25465_MAP_3	LTR	Novel	3172.3	1440.4	1731.9	819.4	769.4	252.8	471.4	99.8	161.4	268.4	329.7
Sj_Blaster_Grouper_23752_MAP_4	LTR	Novel	3168.7	1907.1	1261.6	862	377.1	394.6	286	248.1	204.7	402.4	393.8
Sj_Blaster_Grouper_15149_MAP_5	LTR	Novel	3165.7	768.8	2396.9	272.6	942	216	759.3	116.7	298	163.5	397.6
Sj_Blaster_Grouper_27298_MAP_3	LTR	Novel	3165	1245.3	1919.7	614.8	741	242.1	570.7	110.5	206.5	277.9	401.5
Sj_Blaster_Grouper_28947_MAP_4	LTR	Novel	3164.6	1054.8	2109.8	400.3	1008.5	241.1	455.5	134.2	231.1	279.2	414.7
Sj_Blaster_Grouper_26354_MAP_3	LTR	Novel	3163.9	1728.3	1435.6	702	806.8	522.2	258.7	167.9	96.5	336.2	273.6
Sj_Blaster_Grouper_30924_MAP_3	LTR	Novel	3162.9	1339.6	1823.3	688.5	694.7	259.3	550.4	111.7	194.3	280.1	383.9
Sj_Blaster_Grouper_26780_MAP_3	LTR	Novel	3162.6	1916.8	1245.8	793.9	644.6	573.1	233.6	185.9	103.8	363.9	263.8
Sj_Blaster_Grouper_28239_MAP_3	LTR	Novel	3162.5	1025.8	2136.7	325.3	931.7	207.8	447.1	171.2	282.2	321.5	475.7
Sj_Blaster_Grouper_27934_MAP_9	LTR	Novel	3159.4	1132.1	2027.3	575.1	809.4	210.8	625.7	95	203.5	251.2	388.7
Sj_Blaster_Grouper_32456_MAP_3	LTR	Novel	3159.4	1978.7	1180.7	934.2	465.9	433.2	278.6	218.3	137.8	393	298.4
Sj_Blaster_Grouper_28556_MAP_3	LTR	Novel	3159.2	1044.6	2114.6	362.3	1020.7	250.5	424.8	151.8	234.3	280	434.8
Sj_Blaster_Grouper_23047_MAP_3	LTR	Novel	3158.8	2200.1	958.7	1195.3	425.2	307.3	154.8	48.9	20.7	648.6	358
Sj_Blaster_Grouper_31914_MAP_3	LTR	Novel	3156.7	1095.1	2061.6	163.6	220.3	148.5	280.4	35.8	162.3	747.2	1398.6
Sj_Blaster_Grouper_30403_MAP_4	LTR	Novel	3152.4	1579.5	1572.9	803.8	586.2	334.9	516.7	159.5	153	281.3	317
Sj_Blaster_Grouper_24147_MAP_7	LTR	Novel	3152	1443	1709	847.8	651.5	243.5	524.1	97	182.1	254.7	351.3
Sj_Blaster_Piler_210.2_MAP_5	LTR	Novel	3150.6	1255.8	1894.8	380.6	847.9	243.3	255.5	212.6	296.7	419.3	494.7
Sj_Blaster_Grouper_32238_MAP_13	LTR	Novel	3146.6	2064.7	1081.9	957.1	400.8	408.2	237	245.9	149.7	453.5	294.4
Sj_Blaster_Grouper_34018_MAP_3	LTR	SACI-7_2p	3146.3	1881.6	1264.7	745.8	672.9	554.3	213.8	185.5	124.6	396	253.4
Sj_Blaster_Grouper_28033_MAP_3	LTR	Novel	3145.8	996.2	2149.6	139.6	217.1	131.3	319	33.4	173.2	691.9	1440.3
Sj_Blaster_Grouper_13465_MAP_20	LTR	Novel	3145.3	1367.3	1778	739.4	895.1	272	500.8	179.9	179.3	176	202.8
Sj_Blaster_Grouper_31767_MAP_4	LTR	Novel	3145.2	1569.3	1575.9	789.2	584.4	343	502.6	153.6	163.7	283.5	325.2
Sj_Blaster_Grouper_17878_MAP_4	LTR	Novel	3144.9	1391.7	1753.2	744	888.4	282.6	490.7	184.8	176.2	180.3	197.9
Sj_Blaster_Grouper_24157_MAP_20	LTR	Novel	3142.6	1911	1231.6	746.2	595.6	583.3	245	196.2	109.2	385.3	281.8
Sj_Blaster_Grouper_34068_MAP_3	LTR	Novel	3142	2006.1	1135.9	227.9	158.7	280.1	146.7	161.8	37.3	1336.3	793.2
Sj_Blaster_Grouper_26371_MAP_3	LTR	Novel	3141.9	1338.8	1803.1	736.2	930.3	250.8	508.3	172.7	175.4	179.1	189.1
Sj_Blaster_Grouper_30506_MAP_4	LTR	Novel	3141.8	1789.5	1352.3	905.6	555.5	374.3	374.1	180.3	137.3	329.3	285.4
Sj_Blaster_Grouper_28125_MAP_3	LTR	Novel	3138.5	1463.8	1674.7	583.4	957.7	449.6	278.1	140.4	138.6	290.4	300.3
Sj_Blaster_Grouper_16115_MAP_3	LTR	Novel	3138.1	2338.1	800	888.8	295.1	769.8	215.7	304.6	121.3	374.9	167.9
Sj_Blaster_Grouper_27866_MAP_5	LTR	Novel	3138.1	2037	1101.1	797.6	603.7	620.3	193.5	208.1	84.1	411	219.8
Sj_Blaster_Grouper_18443_MAP_4	LTR	Novel	3137.5	1771.5	1366	894.8	739.4	495.7	270.7	179.3	180	201.7	175.9
Sj_Blaster_Grouper_22880_MAP_17	LTR	Novel	3135.6	1943.3	1192.3	933.4	424.8	381.2	269.9	218.2	155.1	410.5	342.5
Sj_Blaster_Grouper_22445_MAP_8	LTR	Novel	3134.1	1097.5	2036.6	368	585.5	217.5	393.2	140.9	377	371.1	680.9
Sj_Blaster_Grouper_30878_MAP_3	LTR	Novel	3133.8	1546.7	1587.1	570.1	786	493.6	349.9	160.7	157.9	322.3	293.3
Sj_Blaster_Grouper_23318_MAP_3	LTR	Novel	3133.1	1730.9	1402.2	807.3	605.3	354.2	351.9	226.7	146.6	342.7	298.4
Sj_Blaster_Grouper_29890_MAP_3	LTR	Novel	3132	821.7	2310.3	117.8	210.4	107.6	321.4	27.6	184.6	568.7	1593.9
Sj_Blaster_Grouper_27694_MAP_3	LTR	Novel	3131.4	1817	1314.4	824.9	659.9	483.9	262.5	167.8	112.3	340.4	279.7
Sj_Blaster_Grouper_26702_MAP_15	LTR	Novel	3129.5	1296.4	1833.1	694.2	702.9	235.2	557.9	104.1	195.2	262.9	377.1
Sj_Blaster_Grouper_16002_MAP_3	LTR	Novel	3128.5	1313.9	1814.6	581.2	805.5	336.5	383.7	115.6	237.3	280.6	388.1
Sj_Blaster_Grouper_27740_MAP_4	LTR	Novel	3128.3	2212.1	916.2	804.1	376.7	719.9	220.3	308.4	144	379.7	175.2
Sj_Blaster_Grouper_9844_MAP_7	LTR	Novel	3128.1	1779.1	1349	895.1	723.9	504.9	270.5	178.1	179.5	201	175.1
Sj_Blaster_Grouper_19229_MAP_3	LTR	Novel	3127.4	915.4	2212	127.6	216.2	118.8	316.4	30.6	177.9	638.4	1501.5
Sj_Blaster_Grouper_32694_MAP_4	LTR	Novel	3124	1884.5	1239.5	693.6	648.4	579.6	229.7	204.5	104	406.8	257.4
Sj_Blaster_Grouper_28150_MAP_3	LTR	Novel	3121.6	2116.9	1004.7	986.4	334.9	413.5	236	255.8	141	461.2	292.8
Sj_Blaster_Grouper_31551_MAP_3	LTR	Novel	3116.5	1359.3	1757.2	738.7	666.4	252.4	543.1	105.3	187.6	262.9	360.1
Sj_Blaster_Grouper_32003_MAP_4	LTR	Novel	3115.2	2068.3	1046.9	962.4	386.1	427.1	258.9	244	123.7	434.8	278.2
Sj_Blaster_Grouper_29227_MAP_3	LTR	Novel	3114.6	1838.2	1276.4	842.3	451.2	366.8	292	225.1	164.8	404	368.4
Sj_Blaster_Grouper_14295_MAP_3	LTR	Novel	3112.8	1358.9	1753.9	735	884.7	269.8	494.7	179.5	175.9	174.6	198.6
Sj_Blaster_Grouper_30615_MAP_20	LTR	SACI-7_2p	3112.2	1856.2	1256	963.3	635.2	409.6	320	165.7	92.6	317.6	208.2
Sj_Blaster_Grouper_18132_MAP_3	LTR	Novel	3111.1	1500.2	1610.9	802.3	775.5	309.7	478.3	193.8	167.5	194.4	189.6
Sj_Blaster_Grouper_26290_MAP_4	LTR	Novel	3108.3	931.5	2176.8	131	205.5	121.1	318.1	30.3	176.4	649.1	1476.8
Sj_Blaster_Grouper_28584_MAP_3	LTR	Novel	3105.9	1556.5	1549.4	566.6	706.6	495	361.9	166.5	169.2	328.4	311.7
Sj_Blaster_Grouper_27316_MAP_3	LTR	Novel	3105.7	1667.9	1437.8	618.9	674.1	528	325.6	173.9	156.2	347.1	281.9
Sj_Blaster_Grouper_27003_MAP_5	LTR	Novel	3104.5	1834.8	1269.7	733.4	639.8	559.8	247.9	181.8	109.8	359.8	272.2
Sj_Blaster_Grouper_23537_MAP_9	LTR	Novel	3104.4	1739.3	1365.1	894.7	567.6	365.1	411.9	172.1	127.4	307.4	258.2
Sj_Blaster_Grouper_22257_MAP_20	LTR	Novel	3104.1	1237.8	1866.3	619.9	722.5	287.2	582.4	106.5	194.2	224.2	367.2
Sj_Blaster_Grouper_30153_MAP_3	LTR	Novel	3102.1	1256.5	1845.6	660.2	700.7	238.8	563.5	101	195.4	256.5	386
Sj_Blaster_Grouper_8955_MAP_20	LTR	Novel	3101.4	1753	1348.4	883.9	725.3	494.4	269.3	175.9	179.2	198.8	174.6
Sj_Blaster_Grouper_26552_MAP_6	LTR	Novel	3099.1	869.6	2229.5	271.5	965.4	174.7	439.9	146.7	297.5	276.7	526.7
Sj_Blaster_Grouper_28060_MAP_7	LTR	Novel	3098.4	1214.3	1884.1	650.3	720.7	239.4	585.6	88.2	195.1	236.4	382.7
Sj_Blaster_Grouper_23018_MAP_3	LTR	Novel	3098.3	2126	972.3	979.8	321.2	416.8	223.5	259.5	148.5	469.9	279.1
Sj_Blaster_Grouper_31723_MAP_20	LTR	Novel	3094	1312.4	1781.6	580.1	665.2	318.1	587	154.3	180.7	259.9	348.7
Sj_Blaster_Grouper_28879_MAP_4	LTR	Novel	3089.8	881.5	2208.3	129.5	201.7	115.6	311.2	28.3	177.7	608.1	1517.7
Sj_Blaster_Grouper_27926_MAP_6	LTR	Novel	3089.8	962.7	2127.1	332.7	1014.3	217.7	425	133.1	238.9	279.2	448.9
Sj_Blaster_Grouper_28880_MAP_3	LTR	Novel	3089.3	2088.6	1000.7	212.1	139.2	313.8	131.6	170	33.5	1392.7	696.4
Sj_Blaster_Grouper_20964_MAP_6	LTR	Novel	3085.5	1446.7	1638.8	707.5	411.2	284.8	498.5	260.8	393.9	193.6	335.2
Sj_Blaster_Grouper_30170_MAP_8	LTR	Novel	3084.9	1677.4	1407.5	571.3	409.3	273.4	267.9	334.8	251.5	497.9	478.8
Sj_Blaster_Grouper_26919_MAP_3	LTR	Novel	3080.5	901.7	2178.8	294.4	999.4	208.1	426.8	139.6	269.5	259.6	483.1
Sj_Blaster_Grouper_23909_MAP_3	LTR	Novel	3080.1	1205.2	1874.9	424.7	551.4	237	448.4	188.7	301.2	354.8	573.9
Sj_Blaster_Grouper_24226_MAP_3	LTR	Novel	3078	1612.4	1465.6	772.9	536.5	354.6	482.6	172.5	153.1	312.4	293.4
Sj_Blaster_Recon_1606_MAP_20	LTR	BN000804_1p	3074.2	915	2159.2	253.6	571.4	293.3	536.3	125.1	354.5	243	697
Sj_Blaster_Grouper_22541_MAP_5	LTR	Novel	3073.4	2125.2	948.2	212.3	131.3	314.7	122.9	173.2	31.7	1425	662.3
Sj_Blaster_Grouper_27657_MAP_6	LTR	Novel	3073	1007.4	2065.6	385	947.8	273.1	531	117.1	229.6	232.2	357.2
Sj_Blaster_Grouper_15127_MAP_3	LTR	SACI-5_1p	3072.8	1565.2	1507.6	775.4	663.2	274.1	270.5	153.7	190.5	362	383.4
Sj_Blaster_Grouper_17751_MAP_5	LTR	Novel	3069.5	1857.2	1212.3	814.3	333.5	395.6	299.1	245.9	194.7	401.4	385
Sj_Blaster_Grouper_24499_MAP_7	LTR	Novel	3069.3	1867.9	1201.4	683.9	415.1	366.2	243.6	226.2	107.4	591.6	435.3
Sj_Blaster_Grouper_29762_MAP_5	LTR	Novel	3068.7	1543.4	1525.3	641.5	858.2	454.6	291.7	147.2	105.3	300.1	270.1
Sj_Blaster_Grouper_11001_MAP_6	LTR	Novel	3068.1	2098.5	969.6	847.7	401.9	667.4	222.3	260.8	157.6	322.6	187.8
Sj_Blaster_Grouper_18177_MAP_20	LTR	Novel	3064	1157.7	1906.3	344.1	880.9	295.6	385.5	165.1	233.4	352.9	406.5
Sj_Blaster_Piler_129.51_MAP_6	LTR	Novel	3061.1	1851.2	1209.9	712.5	655.9	574	211.8	192.5	96.2	372.2	246
Sj_Blaster_Grouper_20785_MAP_8	LTR	Novel	3060.4	1744.8	1315.6	693.7	538.7	329.5	297.1	363.4	236.1	358.2	243.7
Sj_Blaster_Grouper_32665_MAP_20	LTR	Novel	3058.8	1060.4	1998.4	573.2	773.2	184.8	607.4	84.3	209.4	218.1	408.4
Sj_Blaster_Grouper_32640_MAP_14	LTR	Novel	3057.5	1791.5	1266	674.5	711.8	552.8	222.1	191.4	89.9	372.8	242.2
Sj_Blaster_Grouper_28513_MAP_3	LTR	Novel	3056.3	1945.4	1110.9	886.2	332.4	414.6	256.8	235.2	184.1	409.4	337.6
Sj_Blaster_Grouper_20105_MAP_10	LTR	Novel	3055.8	1739.3	1316.5	777.2	558.6	334.4	327.7	250.8	144	376.9	286.2
Sj_Blaster_Grouper_16437_MAP_4	LTR	Novel	3053.7	1801.4	1252.3	703.2	431.4	359.1	297.5	350	234.6	389.1	288.8
Sj_Blaster_Grouper_16938_MAP_4	LTR	Novel	3053.5	844.9	2208.6	241.5	950.7	176.3	439	149.9	293.3	277.2	525.6
Sj_Blaster_Grouper_30121_MAP_5	LTR	Novel	3052.5	1822.6	1229.9	709.5	645	548.2	226.6	189.9	103.7	375	254.6
Sj_Blaster_Grouper_23148_MAP_6	LTR	Novel	3050.8	1991.6	1059.2	218.8	145.3	291.7	137.6	164	35.6	1317.1	740.7
Sj_Blaster_Grouper_28666_MAP_9	LTR	Novel	3050	1755.1	1294.9	647	663.3	546.7	249.3	191.1	106.7	370.3	275.6
Sj_Blaster_Grouper_29104_MAP_3	LTR	Novel	3046.2	1904.9	1141.3	923.4	416.2	377.6	283.3	216.9	137.9	387	303.9
Sj_Blaster_Grouper_31769_MAP_20	LTR	Novel	3045.5	3025.3	20.2	697.7	11.5	1209.7	6.1	834.5	0.5	283.4	2.1
Sj_Blaster_Grouper_25084_MAP_5	LTR	Novel	3044.9	20.2	3024.7	11.5	697.2	6.1	1209.4	0.5	834.6	2.1	283.5
Sj_Blaster_Grouper_26613_MAP_17	LTR	Novel	3043.7	2036.1	1007.6	790.5	509.5	608.9	188.6	213.6	88.7	423.1	220.8
Sj_Blaster_Grouper_8075_MAP_3	LTR	Novel	3043.1	1805.3	1237.8	491.5	601.5	552.2	216.2	397.1	241.5	364.5	178.6
Sj_Blaster_Grouper_33166_MAP_4	LTR	Novel	3042.7	2053.1	989.6	214.5	145	278.1	131.3	165.5	33	1395	680.3
Sj_Blaster_Grouper_21728_MAP_4	LTR	Novel	3042.1	19.1	3023	10.6	696.4	6	1208.7	0.5	834.6	2	283.3
Sj_Blaster_Grouper_25132_MAP_3	LTR	Novel	3041.3	1228.5	1812.8	665	694.8	216.5	565	98	188.4	249	364.6
Sj_Blaster_Grouper_21187_MAP_8	LTR	Novel	3040.4	1920.1	1120.3	768.6	605	586.2	196.8	196.4	91.5	368.9	227
Sj_Blaster_Grouper_28468_MAP_3	LTR	Novel	3040.2	1010.8	2029.4	133.9	208.6	124.8	265.5	31	155	721.1	1400.3
Sj_Blaster_Grouper_30789_MAP_7	LTR	Novel	3038.9	1267.4	1771.5	650.9	662.2	239	541.9	105.2	194.5	272.3	372.9
Sj_Blaster_Grouper_17583_MAP_3	LTR	Novel	3032.3	1783	1249.3	690.3	403.5	366.5	321.5	339.5	229.5	386.7	294.8
Sj_Blaster_Grouper_29112_MAP_9	LTR	Novel	3032	1856.4	1175.6	922.4	418.7	357.9	267.7	201.2	157.5	374.9	331.7
Sj_Blaster_Grouper_17827_MAP_3	LTR	Novel	3031.7	989.6	2042.1	137.5	207.7	129.9	311.6	33	167.9	689.2	1354.9
Sj_Blaster_Grouper_12794_MAP_20	LTR	Novel	3028.5	1757.4	1271.1	885	707.2	494.7	246.1	177.2	164.4	200.5	153.4
Sj_Blaster_Grouper_22250_MAP_5	LTR	Novel	3028.1	1945.4	1082.7	752.5	591.5	576.4	190	211.7	90.2	404.8	211
Sj_Blaster_Grouper_23246_MAP_3	LTR	Novel	3026.7	1788.9	1237.8	225.3	169.5	270.2	162	149.3	41.7	1144.1	864.6
Sj_Blaster_Grouper_28235_MAP_15	LTR	Novel	3026.6	1204.8	1821.8	434.2	879.5	275.5	364	149.6	204.7	345.5	373.6
Sj_Blaster_Grouper_26666_MAP_4	LTR	Novel	3025.1	1881.4	1143.7	820	291.9	337.2	285.2	402.5	309	321.7	257.6
Sj_Blaster_Grouper_20633_MAP_7	LTR	Novel	3024.2	886.6	2137.6	123.1	203.9	115.9	322.2	30	173.5	617.6	1438
Sj_Blaster_Grouper_20517_MAP_3	LTR	Novel	3023.9	1924	1099.9	887	352.4	386.8	273.8	241.7	143.6	408.5	330.1
Sj_Blaster_Grouper_13888_MAP_6	LTR	Novel	3022.4	958	2064.4	294.9	925.5	218	412	146.4	269.2	298.7	457.7
Sj_Blaster_Grouper_28528_MAP_3	LTR	Novel	3020.3	1201.1	1819.2	462.3	912.6	284.2	358.6	148.4	190.9	306.2	357.1
Sj_Blaster_Grouper_15350_MAP_4	LTR	Novel	3018	1206.5	1811.5	343.3	850.3	297.8	356.3	191.5	216.8	373.9	388.1
Sj_Blaster_Grouper_24726_MAP_3	LTR	Novel	3017.9	1204.2	1813.7	641	688.5	218.4	567	97.7	191.4	247.1	366.8
Sj_Blaster_Grouper_18546_MAP_4	LTR	Novel	3017	1608.4	1408.6	648.9	485.9	306.8	339.7	304.2	257.4	348.5	325.6
Sj_Blaster_Grouper_29795_MAP_3	LTR	NONAUT-5_1p	3016.7	1549.2	1467.5	451.9	403.1	268.5	269.5	271.3	285.3	557.5	509.6
Sj_Blaster_Grouper_27654_MAP_4	LTR	Novel	3016.1	1737.3	1278.8	784.8	695.4	452.3	237.2	160.1	93.6	340.1	252.6
Sj_Blaster_Grouper_29475_MAP_8	LTR	Novel	3012.7	1179.4	1833.3	616.2	714.3	240.4	543.3	95.1	195.6	227.7	380.1
Sj_Blaster_Grouper_12371_MAP_20	LTR	Novel	3012.4	1977.5	1034.9	846.4	258.4	431.6	294.7	367.3	238.3	332.2	243.5
Sj_Blaster_Grouper_27941_MAP_3	LTR	Novel	3012.2	1520.3	1491.9	789.6	546.5	339.1	481.3	141.6	158.9	250	305.2
Sj_Blaster_Grouper_23002_MAP_20	LTR	Novel	3009.6	2062.5	947.1	1101.9	414.5	292.4	154.8	48.1	21.5	620.1	356.3
Sj_Blaster_Grouper_21899_MAP_3	LTR	Novel	3009.5	896.5	2113	126.1	200.5	117	312.1	29.1	168.9	624.3	1431.5
Sj_Blaster_Grouper_25396_MAP_4	LTR	Novel	3008.3	913.4	2094.9	365.5	634.7	174.5	401.1	86.4	347	287	712.1
Sj_Blaster_Grouper_24395_MAP_3	LTR	Novel	3007.5	1307.9	1699.6	518.4	528.7	241.9	401.4	174.8	260.3	372.8	509.2
Sj_Blaster_Grouper_27517_MAP_7	LTR	Novel	3007.4	1269	1738.4	538.3	696.3	276.9	324.8	221.5	363.3	232.3	354
Sj_Blaster_Grouper_28853_MAP_3	LTR	Novel	3005	2062.7	942.3	936.2	294.6	411.3	231.5	264	142.2	451.2	274
Sj_Blaster_Grouper_24085_MAP_3	LTR	Novel	2999.9	1122.8	1877.1	155.1	221.2	146.7	276.8	37.9	152.6	783.1	1226.5
Sj_Blaster_Grouper_23440_MAP_4	LTR	Novel	2994.7	1885.9	1108.8	950.9	474.7	530.7	272.3	189.5	171.8	214.8	190
Sj_Blaster_Grouper_14239_MAP_4	LTR	Novel	2994	717.3	2276.7	261.4	928.8	195.4	701.1	109.3	296.9	151.2	349.9
Sj_Blaster_Grouper_29950_MAP_3	LTR	SACI-7_2p	2993.3	1071.4	1921.9	535.4	793.1	204.2	539.1	92.1	195.1	239.7	394.6
Sj_Blaster_Grouper_22939_MAP_12	LTR	Novel	2991.7	1594.9	1396.8	813.2	503.7	351.8	452.1	155.7	153.2	274.2	287.8
Sj_Blaster_Grouper_15301_MAP_20	LTR	Novel	2991.7	1234.4	1757.3	680	888.8	238.5	492.1	164	178.2	151.9	198.2
Sj_Blaster_Grouper_34013_MAP_5	LTR	Novel	2987.9	1143.9	1844	390.2	859.2	277	378.4	139.9	221.8	336.8	384.6
Sj_Blaster_Grouper_27633_MAP_7	LTR	Novel	2987.3	2001.9	985.4	911.2	331.3	402.9	231.6	251.6	128.5	436.2	294
Sj_Blaster_Grouper_32384_MAP_3	LTR	Novel	2987.3	1880.1	1107.2	219.5	151.2	276.9	142.2	155.3	36.9	1228.4	776.9
Sj_Blaster_Grouper_25223_MAP_3	LTR	Novel	2985.7	837.2	2148.5	116.9	196.1	112	326.1	27.2	174.5	581.1	1451.8
Sj_Blaster_Grouper_25022_MAP_20	LTR	Novel	2985.1	1837.2	1147.9	847.5	385.5	374.8	284.8	230	143.7	384.9	333.9
Sj_Blaster_Grouper_26180_MAP_8	LTR	Novel	2985	1677.2	1307.8	690.8	531.8	301	297.2	343.9	235.4	341.5	243.4
Sj_Blaster_Grouper_32961_MAP_3	LTR	Novel	2983.8	1150.4	1833.4	603.1	698.6	205.5	565.8	97	194.6	244.8	374.4
Sj_Blaster_Grouper_9694_MAP_16	LTR	Novel	2983.4	1473.9	1509.5	390.2	747.3	473.1	280.4	314.5	273.1	296.1	208.7
Sj_Blaster_Grouper_26833_MAP_3	LTR	Novel	2982.2	1525.2	1457	582	688.4	466.2	347.4	160.6	153.6	316.4	267.6
Sj_Blaster_Grouper_19378_MAP_9	LTR	Novel	2982	908.4	2073.6	269.1	883.8	185.4	430.8	167.2	279	286.7	480
Sj_Blaster_Grouper_23378_MAP_20	LTR	Novel	2981.1	1249.3	1731.8	705.4	659.8	213.5	531.2	93.6	183.9	236.8	356.9
Sj_Blaster_Grouper_17286_MAP_13	LTR	Novel	2978.6	1220.5	1758.1	668.6	893.1	238.5	494.3	162.8	176.1	150.6	194.6
Sj_Blaster_Grouper_23932_MAP_4	LTR	Novel	2977.6	1642.8	1334.8	774.8	551.3	307	345.3	219.3	141.5	341.7	296.7
Sj_Blaster_Grouper_15373_MAP_4	LTR	Novel	2976.9	1743.4	1233.5	879.9	680.5	490.2	237.5	175.9	163.8	197.4	151.7
Sj_Blaster_Grouper_17987_MAP_6	LTR	Novel	2975.4	2271.4	704	937.1	253.6	692.4	192	274.6	108.4	367.3	150
Sj_Blaster_Grouper_15885_MAP_20	LTR	Novel	2974.6	1625.2	1349.4	639.9	522.7	311.2	291.8	324.5	238.9	349.6	296
Sj_Blaster_Piler_820.51_MAP_3	LTR	Novel	2974.4	1798.1	1176.3	680.4	667.6	558.3	197.2	191	87	368.4	224.5
Sj_Blaster_Grouper_19134_MAP_17	LTR	Novel	2972.9	1693.8	1279.1	674.1	531.9	316.2	284.8	356	228.6	347.5	233.8
Sj_Blaster_Grouper_23673_MAP_20	LTR	Novel	2972.4	1006.2	1966.2	358.8	580.1	204.9	377.4	106.1	360.1	336.4	648.6
Sj_Blaster_Grouper_32193_MAP_6	LTR	Novel	2971.4	1930.4	1041	941.1	390.4	384.2	231.6	213.1	140	392	279
Sj_Blaster_Grouper_28067_MAP_8	LTR	Novel	2970.6	1916.2	1054.4	910.1	366	378.1	228	219.8	141	408.2	319.4
Sj_Blaster_Grouper_27911_MAP_5	LTR	Novel	2970	996.4	1973.6	367.1	965.3	227.7	390.1	131.5	218.3	270.1	399.9
Sj_Blaster_Grouper_28613_MAP_4	LTR	Novel	2966.3	1347.8	1618.5	521.9	820.2	418.6	343.2	130.9	160.5	276.4	294.6
Sj_Blaster_Grouper_18125_MAP_14	LTR	Novel	2963.5	1221.3	1742.2	670.5	884.7	237.8	487.7	162.9	175	150.1	194.8
Sj_Blaster_Grouper_25066_MAP_7	LTR	Novel	2960.4	1834.6	1125.8	712.8	625.9	577.9	193.1	189.7	84.2	354.2	222.6
Sj_Blaster_Grouper_26820_MAP_15	LTR	Novel	2959.8	1846.6	1113.2	892.2	415.9	377.3	271.3	213.4	130.3	363.7	295.7
Sj_Blaster_Grouper_31930_MAP_3	LTR	Novel	2959.5	1459.1	1500.4	805.6	618.1	269.6	454.2	107.3	141.9	276.6	286.2
Sj_Blaster_Grouper_25340_MAP_20	LTR	Novel	2957.7	1753	1204.7	712.3	666.2	540.1	209.1	172.4	91.8	328.2	237.6
Sj_Blaster_Grouper_27817_MAP_6	LTR	Novel	2957.7	1420.5	1537.2	470	550.1	330.6	291.1	218.1	228.9	401.8	467.1
Sj_Blaster_Grouper_22518_MAP_20	LTR	Novel	2957.2	1184.9	1772.3	398	492.2	235.7	436.1	188.5	288.2	362.7	555.8
Sj_Blaster_Grouper_25167_MAP_4	LTR	Novel	2956.8	1708.3	1248.5	854.3	525.2	387.6	301.3	164.9	132.7	301.5	289.3
Sj_Blaster_Grouper_20790_MAP_20	LTR	Novel	2954.8	1227.1	1727.7	677.2	884.6	237.5	477.3	162.6	174	149.8	191.8
Sj_Blaster_Grouper_20707_MAP_7	LTR	Novel	2954.4	1852.5	1101.9	737.9	598.3	565.8	194	191.5	88.4	357.3	221.2
Sj_Blaster_Grouper_26819_MAP_11	LTR	Novel	2951.3	1272.4	1678.9	716.2	882.4	222.8	456.2	163.5	163.5	169.9	176.8
Sj_Blaster_Grouper_18883_MAP_3	LTR	Novel	2950.4	934.8	2015.6	299.8	891.5	182.1	403	165.7	261.6	287.2	459.5
Sj_Blaster_Grouper_28314_MAP_3	LTR	SACI-7_2p	2949.8	1448.5	1501.3	598	865.4	392.2	256.2	148.8	104.9	309.5	274.8
Sj_Blaster_Grouper_17293_MAP_3	LTR	Novel	2949.2	2142.7	806.5	765.4	256.7	494.1	213.4	322.4	133.2	560.8	203.2
Sj_Blaster_Grouper_24960_MAP_4	LTR	Novel	2948.7	1668.5	1280.2	410.2	475.7	546.3	305.6	359.6	255.8	352.4	243.1
Sj_Blaster_Grouper_29309_MAP_3	LTR	Novel	2946.9	1841.9	1105	841.8	330.7	394.3	252.8	225	182.9	380.8	338.6
Sj_Blaster_Grouper_15999_MAP_8	LTR	Novel	2944.9	958.5	1986.4	291.3	902.7	235.2	396.9	133.7	255.7	298.3	431.1
Sj_Blaster_Grouper_25638_MAP_4	LTR	Novel	2943.1	1817.3	1125.8	699.2	621.1	562	191.2	190.8	86.6	365.3	226.9
Sj_Blaster_Grouper_21721_MAP_9	LTR	Novel	2942.8	1254.3	1688.5	547.6	771	322.7	346.1	115.8	228	268.2	343.4
Sj_Blaster_Grouper_20759_MAP_20	LTR	Novel	2941.1	2003.9	937.2	781	496.7	594.2	167.4	216	78.5	412.7	194.6
Sj_Blaster_Grouper_24195_MAP_3	LTR	Novel	2936.1	2097.1	839	935.7	261.5	421.4	178.3	276.8	136.8	463.2	262.4
Sj_Blaster_Grouper_27410_MAP_20	LTR	Novel	2933.5	1019.3	1914.2	339	893.1	233.8	419.9	148.8	219.5	297.7	381.7
Sj_Blaster_Grouper_30588_MAP_3	LTR	Novel	2932.9	1228.3	1704.6	566.7	627.3	309	531.1	132.7	189.2	219.9	357
Sj_Blaster_Grouper_25657_MAP_3	LTR	NONAUT-5_1p	2931.8	1800.3	1131.5	877.2	394.1	344	271.2	199.9	137.8	379.2	328.4
Sj_Blaster_Grouper_29048_MAP_3	LTR	Novel	2931.6	1065.5	1866.1	149.4	206.7	140.2	275.2	35.2	150.7	740.7	1233.5
Sj_Blaster_Grouper_26111_MAP_3	LTR	Novel	2931.1	843.1	2088	292.1	941.6	193.3	443.7	127.6	251	230.1	451.7
Sj_Blaster_Grouper_27286_MAP_4	LTR	Novel	2930.5	1702.9	1227.6	638.8	678.8	524.3	220.2	184.5	89.9	355.3	238.7
Sj_Blaster_Piler_51.51_MAP_4	LTR	Novel	2929.7	1829.5	1100.2	714.8	616.9	572.2	183	189.1	83	353.4	217.3
Sj_Blaster_Grouper_26117_MAP_3	LTR	Novel	2929	978.1	1950.9	501.7	784.7	177.6	604.3	80.1	194.7	218.7	367.2
Sj_Blaster_Grouper_32368_MAP_13	LTR	Novel	2928.9	1571.3	1357.6	605	672	503.7	314.7	157.7	136.7	304.9	234.2
Sj_Blaster_Grouper_21723_MAP_3	LTR	Novel	2928.6	1282.4	1646.2	445.1	604.7	298.7	351.7	207.8	309.2	330.8	380.6
Sj_Blaster_Grouper_22376_MAP_5	LTR	Novel	2928.3	1986.2	942.1	911.7	300.2	393.1	220.9	243.5	135.5	437.9	285.5
Sj_Blaster_Grouper_27376_MAP_3	LTR	Novel	2928	831.4	2096.6	268.5	966.9	186.3	407.8	127.8	254.2	248.8	467.7
Sj_Blaster_Grouper_2801_MAP_6	LTR	Novel	2926.9	1028.9	1898	200.7	777.5	327.8	400.7	290	455.2	210.4	264.6
Sj_Blaster_Grouper_27625_MAP_3	LTR	Novel	2926.6	1489.6	1437	547.1	707.7	480	330.9	154.8	143.4	307.7	255
Sj_Blaster_Grouper_12503_MAP_3	LTR	Novel	2925.5	1219.4	1706.1	673.9	865.7	235.8	480.4	161.5	170.1	148.2	189.9
Sj_Blaster_Grouper_28920_MAP_8	LTR	Novel	2924.7	1263.1	1661.6	722.7	876.8	218.3	452.4	157.9	159.5	164.2	172.9
Sj_Blaster_Grouper_33482_MAP_3	LTR	Novel	2924.4	1682.2	1242.2	620.2	607.5	541.1	293	179.2	108	341.7	233.7
Sj_Blaster_Piler_114.51_MAP_4	LTR	Novel	2923.7	1462.4	1461.3	621.2	712.8	386.7	323.6	146.9	156.5	307.6	268.4
Sj_Blaster_Grouper_23733_MAP_6	LTR	Novel	2923.5	1975.1	948.4	874.5	302.3	420	189.7	250.4	170.4	430.2	286
Sj_Blaster_Grouper_32960_MAP_20	LTR	Novel	2920	895.3	2024.7	289.2	608.8	191.3	374.6	107.4	350.1	307.4	691.2
Sj_Blaster_Grouper_28783_MAP_3	LTR	Novel	2919.4	2085.3	834.1	198.5	115	307.5	109.1	160.3	28.2	1419	581.8
Sj_Blaster_Piler_848.2_MAP_3	LTR	Novel	2913.9	1970.1	943.8	1043.7	414.5	290.8	153.5	46.8	20.7	588.8	355.1
Sj_Blaster_Grouper_25977_MAP_3	LTR	Novel	2913.4	1868.3	1045.1	209	143.6	278.3	135.6	152.1	35	1228.9	730.9
Sj_Blaster_Grouper_25097_MAP_6	LTR	Novel	2913.1	2115.9	797.2	801.8	226.8	557.8	243.7	254.4	133.8	501.9	192.9
Sj_Blaster_Grouper_14862_MAP_19	LTR	Novel	2910	2224.2	685.8	916.3	244.8	680.8	186.9	272.6	106.5	354.5	147.6
Sj_Blaster_Grouper_26712_MAP_4	LTR	Novel	2909.4	991.4	1918	365.1	924.1	215.8	372.9	137.2	214.6	273.3	406.4
Sj_Blaster_Grouper_26107_MAP_7	LTR	Novel	2908.9	1415.7	1493.2	700.6	540.1	309.4	488.2	145.8	157.3	259.9	307.6
Sj_Blaster_Grouper_28308_MAP_14	LTR	Novel	2907.7	1029.6	1878.1	577	730.3	192.4	579.1	71.5	193.3	188.7	375.4
Sj_Blaster_Grouper_24234_MAP_4	LTR	Novel	2903.8	1955.2	948.6	202.4	133.5	285.2	124.9	157	31.8	1310.6	658.4
Sj_Blaster_Grouper_28299_MAP_3	LTR	Novel	2896	1780.5	1115.5	725	575.7	556.3	201.5	167.3	93.9	331.9	244.4
Sj_Blaster_Grouper_25477_MAP_5	LTR	Novel	2894.6	1153.4	1741.2	159.2	215.2	149.4	255.6	38.6	144.7	806.2	1125.7
Sj_Blaster_Grouper_22506_MAP_20	LTR	Novel	2893.7	2878.9	14.8	672.3	8.3	1134.3	4.5	802	0.4	270.3	1.6
Sj_Blaster_Grouper_18173_MAP_10	LTR	Novel	2892.2	2028.5	863.7	888.4	263.3	426.4	171.4	269.5	153.3	444.2	275.7
Sj_Blaster_Grouper_29081_MAP_20	LTR	Novel	2890	1238.2	1651.8	363.3	554.9	230.4	273.6	213.9	329.3	430.6	494
Sj_Blaster_Grouper_18921_MAP_4	LTR	Novel	2889.9	853.2	2036.7	373.5	1063.3	127.1	303.8	19.7	41.6	332.9	628
Sj_Blaster_Grouper_18036_MAP_20	LTR	Novel	2887.9	892.1	1995.8	272.8	882.1	182.9	406.8	157.6	256.6	278.8	450.3
Sj_Blaster_Grouper_14238_MAP_6	LTR	Novel	2886.9	1703.6	1183.3	864.1	656.1	480.3	220.5	170.3	159.5	188.9	147.2
Sj_Blaster_Grouper_24488_MAP_5	LTR	Novel	2886.1	1165.5	1720.6	411.1	614	234.5	336.5	105.9	215.5	414	554.6
Sj_Blaster_Grouper_24417_MAP_3	LTR	Novel	2882.5	1260.8	1621.7	679.2	638.7	225.4	497.9	100.6	164.4	255.6	320.7
Sj_Blaster_Grouper_22150_MAP_20	LTR	Novel	2882.5	2089.9	792.6	620	247.6	405.1	183.9	395.3	113.3	669.5	247.8
Sj_Blaster_Grouper_20184_MAP_16	LTR	SACI-7_2p	2882.1	922.8	1959.3	494.9	765.3	162.7	587.7	74.8	207.2	190.4	399.1
Sj_Blaster_Grouper_24010_MAP_11	LTR	Novel	2877.7	1310.9	1566.8	510.4	768.2	418.4	345.1	130.3	166.9	251.8	286.6
Sj_Blaster_Grouper_20202_MAP_5	LTR	Novel	2876.2	814.4	2061.8	346.4	1085.2	130.8	305.7	18.7	42.8	318.5	628.1
Sj_Blaster_Grouper_23676_MAP_3	LTR	Novel	2876	1605.5	1270.5	630.8	612.9	508.7	281.6	161	139.3	305	236.7
Sj_Blaster_Grouper_24332_MAP_4	LTR	Novel	2874.6	2006.9	867.7	191.5	121.5	305.8	114.8	160.3	28.8	1349.3	602.6
Sj_Blaster_Grouper_29366_MAP_3	LTR	Novel	2874.4	1502.6	1371.8	571	744.4	478.4	254.1	149.2	99	304	274.3
Sj_Blaster_Grouper_26370_MAP_3	LTR	Novel	2872.8	1075.9	1796.9	463	942.4	268.6	389.2	108.3	166.8	236	298.5
Sj_Blaster_Grouper_30750_MAP_8	LTR	Novel	2871.5	1905.8	965.7	209.7	135.9	277.9	126.9	153.1	32.2	1265.1	670.7
Sj_Blaster_Grouper_32468_MAP_5	LTR	Novel	2869.3	1982	887.3	794.5	474.1	608.2	174.8	201.1	62.7	378.2	175.7
Sj_Blaster_Grouper_27348_MAP_4	LTR	Novel	2867.6	1373	1494.6	537.5	772.8	374.9	340.7	152.1	139.8	308.5	241.3
Sj_Blaster_Grouper_18605_MAP_14	LTR	Novel	2866.9	1410.7	1456.2	457	550.5	359.3	305	221.4	247.1	373	353.6
Sj_Blaster_Piler_202.2_MAP_5	LTR	Novel	2866.3	930.2	1936.1	361	1048.8	174.5	270.1	71.8	54.1	322.9	563.1
Sj_Blaster_Grouper_23891_MAP_20	LTR	Novel	2859.4	2023.1	836.3	1037.7	339.7	304.7	145.3	79.2	24.9	601.5	326.4
Sj_Blaster_Grouper_31846_MAP_4	LTR	Novel	2858.9	1627.4	1231.5	672.6	658	454.4	231.9	166.5	101	333.9	240.6
Sj_Blaster_Grouper_29719_MAP_8	LTR	Novel	2856.7	1392.1	1464.6	509.9	650.4	455.9	351.3	143.1	162.4	283.2	300.5
Sj_Blaster_Grouper_21410_MAP_20	LTR	Novel	2856.3	780.8	2075.5	241.2	603.9	180.5	400.6	109.6	391.9	249.5	679.1
Sj_Blaster_Grouper_27582_MAP_3	LTR	Novel	2855.9	1951.9	904	201.5	124.7	284.4	116.2	157.7	30.1	1308.3	633
Sj_Blaster_Piler_584.16_MAP_4	LTR	Novel	2855.5	953.8	1901.7	284.8	871	209.5	389.8	158.7	235.2	300.8	405.7
Sj_Blaster_Grouper_24901_MAP_20	LTR	Novel	2854.7	2007.8	846.9	1087.1	371.3	279.9	143.4	51.7	20.5	589.1	311.7
Sj_Blaster_Grouper_23908_MAP_20	LTR	Novel	2853.4	1958	895.4	1053.7	392.5	277.4	150.1	52.2	21.2	574.7	331.6
Sj_Blaster_Grouper_28480_MAP_9	LTR	Novel	2850.4	1033.4	1817	371.7	878.6	239.4	391.7	142	202.7	280.3	344
Sj_Blaster_Grouper_28807_MAP_4	LTR	Novel	2848.7	1721.3	1127.4	204.1	156	280.2	148.1	145.9	37.3	1091.1	786
Sj_Blaster_Grouper_5566_MAP_3	LTR	Novel	2844.7	1155.4	1689.3	611.2	858.3	236.1	472.8	160	169.4	148.1	188.8
Sj_Blaster_Grouper_26691_MAP_12	LTR	Novel	2843.7	1889.7	954	897.7	331.7	413	221.9	211.7	140.8	367.3	259.6
Sj_Blaster_Grouper_23576_MAP_20	LTR	Novel	2842.1	1029.3	1812.8	376.5	881.6	247.5	359.1	121	207.8	284.3	364.3
Sj_Blaster_Grouper_32093_MAP_4	LTR	Novel	2840.7	2040.8	799.9	178.2	114.5	300.2	102	160	25.4	1402.4	558
Sj_Blaster_Grouper_24293_MAP_11	LTR	Novel	2838.6	1153.1	1685.5	621	655.7	212.8	521.6	88.7	174.5	230.6	333.7
Sj_Blaster_Grouper_24514_MAP_20	LTR	Novel	2835.4	1908.1	927.3	882.7	317.7	412.7	218.7	224.5	133.2	388.2	257.7
Sj_Blaster_Grouper_20872_MAP_5	LTR	Novel	2835.1	1269.8	1565.3	553.7	702.7	327.4	341.3	112.6	195.1	276.1	326.2
Sj_Blaster_Grouper_21223_MAP_5	LTR	Novel	2832.8	1516.1	1316.7	513	383.8	314.3	310.7	231.8	204.3	457	417.9
Sj_Blaster_Grouper_31577_MAP_6	LTR	Novel	2832	1319.6	1512.4	446	595.7	352.7	297.3	200.6	249.8	320.3	369.6
Sj_Blaster_Grouper_23696_MAP_5	LTR	Novel	2831.1	1072.9	1758.2	564.9	666.2	191.5	556.2	86.6	186.8	229.9	349
Sj_Blaster_Grouper_25702_MAP_17	LTR	Novel	2830.1	1796.9	1033.2	887	432	389.2	249.2	187.8	105.5	332.9	246.5
Sj_Blaster_Grouper_27492_MAP_3	LTR	Novel	2828.9	926.2	1902.7	234.8	820.3	260.9	385.6	215.1	361.2	215.4	335.6
Sj_Blaster_Grouper_30633_MAP_3	LTR	Novel	2827.4	1068.5	1758.9	395.2	892.8	254.9	343.8	130.6	182.5	287.8	339.8
Sj_Blaster_Grouper_22941_MAP_4	LTR	Novel	2827.3	1245.1	1582.2	682.1	594.6	214.8	485.8	106.3	170.4	241.9	331.4
Sj_Blaster_Grouper_12359_MAP_3	LTR	Novel	2826.5	1204.6	1621.9	544.9	728.9	310.8	351.1	97.9	206.1	251	335.8
Sj_Blaster_Grouper_22885_MAP_3	LTR	Novel	2824.8	1572.7	1252.1	619.7	529.1	296.8	274.7	333.5	221	322.7	227.3
Sj_Blaster_Grouper_30536_MAP_3	LTR	Novel	2821.8	1580.3	1241.5	776.2	510.9	303	307.3	172.5	138.4	328.6	284.9
Sj_Blaster_Grouper_25460_MAP_3	LTR	Novel	2821.5	1941	880.5	215.5	126	313.9	115.1	142.4	29.2	1269.2	610.2
Sj_Blaster_Grouper_6980_MAP_5	LTR	Novel	2818.6	1628	1190.6	841.5	655	449.4	231.4	160.1	158.7	177	145.5
Sj_Blaster_Grouper_25713_MAP_14	LTR	Novel	2817.3	1177.6	1639.7	432.7	591.9	224.8	317.2	133.4	227.9	386.7	502.7
Sj_Blaster_Grouper_27049_MAP_3	LTR	Novel	2817	821.8	1995.2	113.1	191	107	290.3	27.8	157.6	573.9	1356.3
Sj_Blaster_Grouper_20982_MAP_3	LTR	Novel	2816.2	1876.1	940.1	212.5	123.6	266.4	115.8	150	31.7	1247.2	669
Sj_Blaster_Grouper_23213_MAP_3	LTR	Novel	2815.7	1837.8	977.9	199.3	142.6	265.1	130.7	150.3	31.9	1223.1	672.7
Sj_Blaster_Grouper_24855_MAP_3	LTR	Novel	2815.6	1922.6	893	209	120	274.3	110.7	150.8	29.8	1288.5	632.5
Sj_Blaster_Grouper_22664_MAP_9	LTR	Novel	2813.6	894.2	1919.4	288.3	885.2	210.9	385	122.1	235	272.9	414.2
Sj_Blaster_Grouper_29628_MAP_14	LTR	Novel	2811.4	1481.9	1329.5	433.5	358.8	258.4	248.2	268.1	266.5	521.9	456
Sj_Blaster_Grouper_24696_MAP_3	LTR	Novel	2810.7	1325.7	1485	611.7	568	302.5	407.5	154	159.2	257.5	350.3
Sj_Blaster_Grouper_30104_MAP_8	LTR	Novel	2808.9	1473.1	1335.8	591.2	649.5	446.6	324.7	141.6	134.7	293.7	226.9
Sj_Blaster_Grouper_20397_MAP_5	LTR	Novel	2806.4	963.1	1843.3	298.6	501.2	199.2	361.5	130.8	346.6	334.5	634
Sj_Blaster_Grouper_16774_MAP_12	LTR	Novel	2805.9	1136	1669.9	386.7	640.7	274.5	340.6	199.6	320.8	275.2	367.8
Sj_Blaster_Grouper_19318_MAP_4	LTR	Novel	2805.2	1888	917.2	888.2	292.6	362.1	220.7	228.2	128.1	409.5	275.8
Sj_Blaster_Grouper_14443_MAP_5	LTR	Novel	2804.1	1050.5	1753.6	302.8	775.5	244.8	378.1	165.3	232.3	337.6	367.7
Sj_Blaster_Grouper_24911_MAP_4	LTR	Novel	2798.1	1413.7	1384.4	413.8	452.5	304.6	274.8	262.9	203.9	432.4	453.2
Sj_Blaster_Grouper_22042_MAP_20	LTR	Novel	2797.1	915.2	1881.9	504.5	729.7	153.7	561.4	71.3	200.1	185.7	390.7
Sj_Blaster_Grouper_30423_MAP_3	LTR	NONAUT-3_1p	2797	1463.2	1333.8	450.7	442.5	324.4	260.9	242.9	209.6	445.2	420.8
Sj_Blaster_Grouper_24576_MAP_3	LTR	Novel	2795.4	1818	977.4	808.3	279.5	381.1	227.4	233.8	151.4	394.8	319.1
Sj_Blaster_Grouper_31308_MAP_20	LTR	Novel	2794.9	1428.2	1366.7	609	474	359.2	454.7	168.5	143.7	291.5	294.3
Sj_Blaster_Grouper_28048_MAP_3	LTR	Novel	2794.2	897.7	1896.5	332.4	929.6	213.7	374.6	117.8	206.7	233.8	385.6
Sj_Blaster_Grouper_21592_MAP_4	LTR	Novel	2793.7	937.4	1856.3	297.3	883.9	228.4	362.7	126	216.5	285.7	393.2
Sj_Blaster_Grouper_28917_MAP_8	LTR	Novel	2792.6	1458.4	1334.2	591.3	742.5	438.2	239.6	142	100.9	286.9	251.2
Sj_Blaster_Grouper_26431_MAP_17	LTR	Novel	2791.6	1250.8	1540.8	699.7	629.6	216.9	478.7	90.5	151.1	243.7	281.4
Sj_Blaster_Grouper_15668_MAP_5	LTR	Novel	2790.5	647.9	2142.6	204.3	930.7	130.1	421.3	111.1	287.1	202.4	503.5
Sj_Blaster_Grouper_29254_MAP_15	LTR	Novel	2789.6	1903.4	886.2	848.7	272.1	398.9	199.1	235.6	143.9	420.2	271.1
Sj_Blaster_Grouper_17001_MAP_20	LTR	Novel	2789.2	1562.6	1226.6	515.5	218.5	381.7	367.6	386.3	378.5	279.1	262
Sj_Blaster_Grouper_26967_MAP_14	LTR	Novel	2789.1	1659.7	1129.4	613.9	633.9	526.9	190.2	179	84.8	339.9	220.5
Sj_Blaster_Grouper_24313_MAP_3	LTR	Novel	2788.6	1698.2	1090.4	913.6	422.6	361.7	290	148.5	122	274.4	255.8
Sj_Blaster_Grouper_25240_MAP_3	LTR	Novel	2788.3	1045.8	1742.5	547.6	704.8	203.3	544.7	81.1	168.4	213.8	324.6
Sj_Blaster_Grouper_15709_MAP_3	LTR	Novel	2788.3	1545.1	1243.2	585.4	485.6	312.7	266.5	306.3	213.5	340.7	277.6
Sj_Blaster_Grouper_27900_MAP_3	LTR	Novel	2787.9	558.7	2229.2	76.1	181.5	73.1	311.4	19.2	170	390.3	1566.3
Sj_Blaster_Grouper_29107_MAP_5	LTR	Novel	2787.9	1766.9	1021	871.3	383.7	349	246	196	120.4	350.6	270.9
Sj_Blaster_Grouper_27033_MAP_4	LTR	Novel	2787.1	1626.4	1160.7	771.9	454.9	358.1	270.9	183.6	136.3	312.8	298.6
Sj_Blaster_Grouper_27993_MAP_3	LTR	Novel	2785.5	1658.8	1126.7	657.5	551.1	506.8	217.8	167.2	100.3	327.3	257.5
Sj_Blaster_Grouper_19872_MAP_3	LTR	Novel	2785.4	1986.5	798.9	892.2	252	400.3	170.2	255	126.3	439	250.4
Sj_Blaster_Grouper_32254_MAP_19	LTR	Novel	2785.4	1855.6	929.8	919.3	342.5	359.4	209.6	201	127.6	375.9	250.1
Sj_Blaster_Grouper_33447_MAP_6	LTR	SACI-7_2p	2785.2	1725.3	1059.9	863.9	527.5	393.6	267.8	142.2	82.2	325.6	182.4
Sj_Blaster_Grouper_23499_MAP_4	LTR	Novel	2784.8	1958.7	826.1	1065.5	362	271.7	140.1	51.5	17.8	570	306.2
Sj_Blaster_Grouper_22125_MAP_8	LTR	Novel	2783.4	1146.4	1637	378.3	464.7	237.1	405.7	179.7	257.7	351.3	508.9
Sj_Blaster_Grouper_21020_MAP_4	LTR	Novel	2782.9	844.5	1938.4	114.5	197.8	106.4	281.2	28.3	152.8	595.3	1306.6
Sj_Blaster_Grouper_27566_MAP_5	LTR	Novel	2782.6	1805.2	977.4	876.2	352.5	385.6	229	200.1	134.9	343.3	261
Sj_Blaster_Grouper_28394_MAP_18	LTR	Novel	2782.3	1354	1428.3	535.5	636.6	423.2	342.3	126.5	160.7	268.8	288.7
Sj_Blaster_Grouper_30433_MAP_3	LTR	Novel	2781.1	1588.4	1192.7	463.5	377.4	368.4	256.7	257.5	195.8	499	362.8
Sj_Blaster_Grouper_7339_MAP_20	LTR	Novel	2777.9	1572.5	1205.4	514.9	210.2	381.7	362.7	395.5	375.4	280.4	257.1
Sj_Blaster_Grouper_20224_MAP_3	LTR	Novel	2777.4	1728	1049.4	700.5	604.2	534.3	168.7	173.6	76.6	319.6	199.9
Sj_Blaster_Grouper_17880_MAP_20	LTR	Novel	2776	861.7	1914.3	260.1	557.3	192.1	356.4	136.7	372.6	272.8	628
Sj_Blaster_Grouper_19887_MAP_5	LTR	Novel	2774.8	967.8	1807	327.7	824.8	226.2	372.9	122.8	221.2	291.1	388.1
Sj_Blaster_Grouper_21026_MAP_3	LTR	Novel	2772.6	1674.6	1098	830.5	396.2	331	254.3	183.9	136	329.2	311.5
Sj_Blaster_Grouper_31863_MAP_11	LTR	Novel	2769.9	1660.6	1109.3	843.3	436.4	331.6	273.1	174.8	123.9	310.9	275.9
Sj_Blaster_Grouper_22511_MAP_5	LTR	Novel	2769.3	1034.6	1734.7	357.9	490.2	202.6	424	162.3	281.5	311.8	539
Sj_Blaster_Grouper_30879_MAP_3	LTR	Novel	2769.2	1220.2	1549	458.4	795.4	391.8	334.8	116.7	144.7	253.3	274.1
Sj_Blaster_Grouper_25973_MAP_3	LTR	Novel	2767.9	1765.1	1002.8	828.5	317.4	373.5	218.3	208.2	165.6	354.9	301.5
Sj_Blaster_Grouper_14158_MAP_4	LTR	Novel	2764.6	994.8	1769.8	360.3	689.8	218.4	355.2	176	342.3	240.1	382.5
Sj_Blaster_Grouper_15161_MAP_5	LTR	Novel	2763.8	2125.9	637.9	923	198.8	417.6	124.6	289.2	104.8	496.1	209.7
Sj_Blaster_Grouper_25610_MAP_4	LTR	Novel	2763.2	1248	1515.2	635.4	681.2	232.1	414.3	109.7	140.2	270.8	279.5
Sj_Blaster_Grouper_20630_MAP_3	LTR	Novel	2762.5	972.2	1790.3	317.4	831.7	231.6	359.5	127.7	222.3	295.5	376.8
Sj_Blaster_Grouper_23216_MAP_3	LTR	Novel	2762.4	1430.1	1332.3	518.5	651.7	468.9	291	153.1	143.1	289.6	246.5
Sj_Blaster_Grouper_29817_MAP_4	LTR	Novel	2760.7	2046.2	714.5	185	98.4	299.2	93.6	156.2	24.1	1405.8	498.4
Sj_Blaster_Grouper_25505_MAP_3	LTR	Novel	2759.2	1367.6	1391.6	540.9	656.3	411.1	335.5	137.1	148.7	278.5	251.1
Sj_Blaster_Grouper_23839_MAP_20	LTR	Novel	2756.5	1838.1	918.4	720.1	458.3	562	179.5	189.3	77.2	366.7	203.4
Sj_Blaster_Grouper_30479_MAP_6	LTR	Novel	2756.1	1173.9	1582.2	396.7	421.6	236.3	388.2	188	273.8	352.9	498.6
Sj_Blaster_Grouper_27276_MAP_7	LTR	Novel	2754.6	913.2	1841.4	501.7	704.1	153.8	577.7	70.5	191	187.2	368.6
Sj_Blaster_Grouper_25697_MAP_9	LTR	Novel	2753.4	1402.6	1350.8	805.9	582.4	241.2	405.4	98.1	124.5	257.4	238.5
Sj_Blaster_Grouper_23480_MAP_5	LTR	Novel	2752.3	1377.6	1374.7	509.8	653.5	428	329.1	150.2	143.4	289.6	248.7
Sj_Blaster_Grouper_24865_MAP_8	LTR	Novel	2752	1354.2	1397.8	652.4	769.3	388.6	253.7	136	182.2	177.2	192.6
Sj_Blaster_Grouper_26738_MAP_3	LTR	Novel	2751.9	1756.8	995.1	713.9	547.8	524.2	178.6	174.3	74.4	344.4	194.3
Sj_Blaster_Grouper_19183_MAP_5	LTR	Novel	2750.1	1687.2	1062.9	204.6	147.7	241.8	137.5	139.5	35.4	1101.3	742.3
Sj_Blaster_Grouper_26065_MAP_5	LTR	Novel	2749.8	1342.3	1407.5	468.8	620.1	449.3	343.8	147.9	159.4	276.3	284.2
Sj_Blaster_Grouper_13734_MAP_18	LTR	Novel	2749.3	1491.7	1257.6	574.7	477.8	300.4	275.1	293.7	220.3	322.9	284.4
Sj_Blaster_Grouper_25814_MAP_3	LTR	Novel	2746.7	1857.5	889.2	892.3	376.6	406.7	217	200.3	92.1	358.2	203.5
Sj_Blaster_Grouper_6780_MAP_6	LTR	Novel	2744.9	1117.6	1627.3	599.6	840.7	222.6	449.7	153.8	160.2	141.6	176.7
Sj_Blaster_Grouper_27542_MAP_7	LTR	Novel	2743.5	1460.9	1282.6	595	661.7	408	239.2	151	109.7	306.9	272
Sj_Blaster_Grouper_22678_MAP_3	LTR	Novel	2740.7	1719.6	1021.1	846.4	376.2	340.7	234	190.3	124.6	342.2	286.3
Sj_Blaster_Grouper_22207_MAP_3	LTR	Novel	2739.8	791.7	1948.1	342.5	1046.6	137.2	269.6	17.9	47.4	294.1	584.5
Sj_Blaster_Grouper_21054_MAP_4	LTR	Novel	2739.8	1768.5	971.3	196.7	136.5	267.7	128	144.9	32.2	1159.2	674.6
Sj_Blaster_Grouper_22784_MAP_5	LTR	Novel	2739.1	1558.3	1180.8	704.1	415.1	290.4	316.2	230	183	333.8	266.5
Sj_Blaster_Grouper_17541_MAP_6	LTR	Novel	2738.9	817.8	1921.1	251.1	863.6	163.9	388.1	144.9	242.6	257.9	426.8
Sj_Blaster_Grouper_27171_MAP_3	LTR	Novel	2738.7	1591.3	1147.4	665.3	609.9	428.4	203.2	162.6	95.3	335	239
Sj_Blaster_Grouper_22585_MAP_3	LTR	Novel	2733.2	768.6	1964.6	343.1	1074.2	129.8	273	16.7	51.5	279	565.9
Sj_Blaster_Grouper_30138_MAP_3	LTR	Novel	2732.7	890	1842.7	123.1	196.9	115.3	290.5	29.8	141.3	621.8	1214
Sj_Blaster_Grouper_30474_MAP_20	LTR	Novel	2732.5	1466.3	1266.2	775.5	615.8	286	363.5	203	130.9	201.8	156
Sj_Blaster_Grouper_29513_MAP_8	LTR	Novel	2732.2	1339.3	1392.9	387.9	399.9	222.5	254.5	248	266	480.9	472.5
Sj_Blaster_Grouper_23239_MAP_10	LTR	Novel	2730.5	961.8	1768.7	378.2	873.9	235.4	351.1	110	192.3	238.2	351.4
Sj_Blaster_Grouper_21041_MAP_3	LTR	Novel	2729.7	1046.6	1683.1	148	202.1	137.5	238.1	35.2	138.1	725.9	1104.8
Sj_Blaster_Grouper_29160_MAP_4	LTR	Novel	2729.5	647.4	2082.1	96.8	160.7	85	304.8	19.1	163.5	446.5	1453.1
Sj_Blaster_Grouper_22806_MAP_3	LTR	Novel	2728.6	729.1	1999.5	242.1	937.7	178.3	396.7	101.7	240.8	207	424.3
Sj_Blaster_Grouper_28285_MAP_5	LTR	SACI-5_1p	2724.5	1669.2	1055.3	576	366.3	331	223.5	252	132.2	510.2	333.3
Sj_Blaster_Grouper_30880_MAP_5	LTR	Novel	2722.5	1472	1250.5	567	726.5	452.9	219.5	154.3	79.9	297.8	224.6
Sj_Blaster_Grouper_18934_MAP_3	LTR	Novel	2722.3	681.1	2041.2	243.8	833.5	180	632.5	107.5	257.1	149.8	318.1
Sj_Blaster_Grouper_30596_MAP_7	LTR	Novel	2722.1	1634.6	1087.5	841.1	410	329.2	275.7	167.8	121.7	296.5	280.1
Sj_Blaster_Grouper_28244_MAP_3	LTR	Novel	2721.2	901.9	1819.3	497.6	695.1	154.3	574.5	68	190.2	182	359.5
Sj_Blaster_Grouper_22310_MAP_4	LTR	Novel	2719.3	1619.4	1099.9	201.8	152.4	241.1	143.6	136.1	36.6	1040.4	767.3
Sj_Blaster_Grouper_20326_MAP_13	LTR	Novel	2718.8	996.8	1722	134.7	210.7	128.6	257.3	33.8	140.7	699.7	1113.3
Sj_Blaster_Grouper_12449_MAP_3	LTR	Novel	2714.3	1446.6	1267.7	362.7	628.7	470.8	246.9	311.7	228.4	301.4	163.7
Sj_Blaster_Grouper_21703_MAP_3	LTR	Novel	2713.3	841.4	1871.9	279.7	876.9	201	375.3	108.6	228	252.1	391.7
Sj_Blaster_Grouper_8364_MAP_5	LTR	Novel	2712.9	1649.8	1063.1	847.6	596.6	465.1	195.4	160.8	143.1	176.3	128
Sj_Blaster_Grouper_28367_MAP_3	LTR	Novel	2712.5	971.7	1740.8	340	829.5	225.3	373.8	139.3	202.2	267.1	335.3
Sj_Blaster_Grouper_29003_MAP_17	LTR	Novel	2712.1	1025.5	1686.6	464.2	617.1	279.8	554.8	99.2	174	182.3	340.7
Sj_Blaster_Grouper_29733_MAP_3	LTR	Novel	2710.8	1826	884.8	188.4	123.2	271.2	116.4	149.2	29.7	1217.2	615.5
Sj_Blaster_Grouper_22854_MAP_3	LTR	Novel	2708.4	830.3	1878.1	117.2	185.8	109.3	286.9	28.4	137.5	575.4	1267.9
Sj_Blaster_Grouper_22983_MAP_4	LTR	Novel	2707.1	881.7	1825.4	123.1	188.6	115.7	268.3	29.7	145.8	613.2	1222.7
Sj_Blaster_Grouper_22353_MAP_6	LTR	Novel	2704.4	1767.9	936.5	682.3	301.8	388.8	208.6	222.3	109.7	474.5	316.4
Sj_Blaster_Grouper_28137_MAP_3	LTR	Novel	2704.2	1294	1410.2	496.5	635.8	409	333.6	134.2	164.7	254.3	276.1
Sj_Blaster_Grouper_14211_MAP_9	LTR	Novel	2703.9	1018.2	1685.7	561.7	868.1	194.4	474.7	134.5	164.9	127.6	178
Sj_Blaster_Piler_512.68_MAP_3	LTR	NONAUT-5_1p	2702.2	1575.5	1126.7	532.1	341.8	264.1	207.7	316.4	187.1	462.9	390.1
Sj_Blaster_Grouper_26617_MAP_16	LTR	Novel	2700.5	1458.1	1242.4	766.7	596	287.2	361.5	201.5	129.3	202.7	155.6
Sj_Blaster_Grouper_22399_MAP_3	LTR	Novel	2700	1037	1663	356	570.8	221.2	331.8	131.6	251.2	328.2	509.2
Sj_Blaster_Piler_234.51_MAP_7	LTR	Novel	2699	1553.8	1145.2	598.7	633.8	479.6	199.2	160.3	88.1	315.2	224.1
Sj_Blaster_Grouper_23196_MAP_20	LTR	Novel	2696.9	1769.5	927.4	824.6	278.4	363.3	242.8	214.2	123.9	367.4	282.3
Sj_Blaster_Grouper_22262_MAP_20	LTR	Novel	2695.5	870.1	1825.4	374.5	929.1	147.4	288.9	25.4	69	322.8	538.4
Sj_Blaster_Grouper_20298_MAP_4	LTR	Novel	2694.2	1369.7	1324.5	391.5	367.4	224.1	240.2	254.9	258.5	499.2	458.4
Sj_Blaster_Grouper_25875_MAP_17	LTR	Novel	2693.4	1494.7	1198.7	741.4	303.9	273.6	383	275.3	279.6	204.4	232.2
Sj_Blaster_Grouper_21727_MAP_3	LTR	Novel	2691.1	1687.7	1003.4	842.9	374.7	332.8	228.3	184.5	126.9	327.5	273.5
Sj_Blaster_Grouper_20665_MAP_3	LTR	Novel	2687.7	1392	1295.7	481	627.2	471.9	294.3	150.3	123.5	288.8	250.7
Sj_Blaster_Grouper_19820_MAP_5	LTR	Novel	2687.2	1222.3	1464.9	540.8	662.2	312.1	317.5	106.6	183.2	262.8	302
Sj_Blaster_Grouper_23097_MAP_10	LTR	Novel	2685.4	987.5	1697.9	521.9	716.4	176.6	522.6	78.2	152.7	210.8	306.2
Sj_Blaster_Grouper_21272_MAP_4	LTR	Novel	2684.1	1062.2	1621.9	565.2	602.6	179.3	490.6	96.8	179.3	220.9	349.4
Sj_Blaster_Grouper_20282_MAP_20	LTR	Novel	2684	844.3	1839.7	364.1	949.5	146.4	283.2	29.9	74.1	303.9	532.9
Sj_Blaster_Grouper_26614_MAP_4	LTR	Novel	2683	829.8	1853.2	317.1	917.3	199.5	374.6	103.1	199	210.1	362.3
Sj_Blaster_Grouper_21404_MAP_7	LTR	Novel	2682.3	1047.2	1635.1	371.9	566.2	203.1	318.6	91.5	210.9	380.7	539.4
Sj_Blaster_Grouper_19006_MAP_3	LTR	Novel	2681.3	754.9	1926.4	244.2	562.6	180.6	453.4	80.2	280.5	249.9	629.9
Sj_Blaster_Grouper_13356_MAP_3	LTR	Novel	2674.2	1702.8	971.4	664.5	348	343.4	216.8	329.1	172.6	365.8	234
Sj_Blaster_Grouper_14726_MAP_3	LTR	Novel	2670.3	2012.4	657.9	901.6	195.7	401.8	137.7	258.6	115.8	450.4	208.7
Sj_Blaster_Grouper_28845_MAP_3	LTR	Novel	2670.2	1529	1141.2	582.1	614.7	477.1	198.7	160.6	92.8	309.2	235
Sj_Blaster_Grouper_23190_MAP_20	LTR	Novel	2669.9	1851.9	818	970.9	390	407.4	196.5	164.5	71.2	309.1	160.3
Sj_Blaster_Grouper_24394_MAP_20	LTR	Novel	2669.6	1787.1	882.5	884.5	358.9	358.3	203.7	199.6	100.3	344.7	219.6
Sj_Blaster_Grouper_21668_MAP_3	LTR	Novel	2667.9	1785.2	882.7	844.9	303.5	356.4	212.6	213.4	108.7	370.5	257.9
Sj_Blaster_Grouper_17962_MAP_4	LTR	Novel	2666.5	1871.1	795.4	182.3	113.7	257.2	103.2	150.2	26.3	1281.4	552.2
Sj_Blaster_Grouper_23208_MAP_20	LTR	Novel	2665.4	1755.5	909.9	817.9	276	360.7	237	212.9	121.2	364	275.7
Sj_Blaster_Grouper_12280_MAP_20	LTR	Novel	2665.2	1220	1445.2	587.8	762.1	354.8	283.7	127.2	201.1	150.2	198.3
Sj_Blaster_Grouper_20742_MAP_3	LTR	Novel	2664.2	1544.4	1119.8	415.2	392.4	397.9	217.1	242.1	177	489.2	333.3
Sj_Blaster_Grouper_8368_MAP_7	LTR	Novel	2663.8	993.6	1670.2	547.4	856.7	189.3	473.1	131.5	162.5	125.4	177.9
Sj_Blaster_Grouper_19882_MAP_3	LTR	Novel	2663.6	1295.4	1368.2	432.2	509.1	328.2	293.2	207.3	230.3	327.7	335.6
Sj_Blaster_Grouper_19087_MAP_3	LTR	Novel	2663.3	823	1840.3	113.1	182.8	108.8	281.2	27.4	149	573.7	1227.3
Sj_Blaster_Grouper_23542_MAP_3	LTR	Novel	2662.7	1605.9	1056.8	829.8	426.1	321.2	254.9	164.4	114.7	290.5	261.1
Sj_Blaster_Grouper_30775_MAP_4	LTR	Novel	2661.8	1711.1	950.7	837.9	338.8	367.2	205.1	192.9	140.7	313.1	266.1
Sj_Blaster_Grouper_19560_MAP_4	LTR	Novel	2661.2	699.3	1961.9	294.5	1040.8	115.5	283.2	15.9	41.3	273.4	596.6
Sj_Blaster_Grouper_29027_MAP_5	LTR	Novel	2661	1043.5	1617.5	627.5	605.2	168.4	520.8	61.5	166.7	186.1	324.8
Sj_Blaster_Grouper_4830_MAP_3	LTR	Novel	2660.2	1443.9	1216.3	366.9	603.6	469.9	203.4	310.1	237.4	297	171.9
Sj_Blaster_Grouper_30976_MAP_5	LTR	SACI-7_2p	2657.2	1241.3	1415.9	471.5	555.6	270.8	275.4	217.2	275.3	281.8	309.6
Sj_Blaster_Grouper_24844_MAP_8	LTR	Novel	2656.5	1006.3	1650.2	530.4	615	178.8	518.8	82.1	179.5	215	336.9
Sj_Blaster_Grouper_31278_MAP_4	LTR	Novel	2655	1098.9	1556.1	578	638.8	197.5	432.5	89.5	158.8	233.9	326
Sj_Blaster_Grouper_13205_MAP_3	LTR	Novel	2654.5	1445.1	1209.4	764.8	588.3	282	350.9	200.9	124.3	197.4	145.9
Sj_Blaster_Grouper_23439_MAP_5	LTR	Novel	2652.5	1641.6	1010.9	859.2	575.5	460.8	182.1	156.4	130.3	165.2	123
Sj_Blaster_Grouper_10378_MAP_3	LTR	Novel	2651.6	1270.3	1381.3	614.2	598.9	218.9	257.2	119.7	180.2	317.5	345
Sj_Blaster_Grouper_30630_MAP_3	LTR	Novel	2651.1	784	1867.1	282.6	869.1	177.7	375.8	101.2	227.7	222.5	394.5
Sj_Blaster_Grouper_30027_MAP_20	LTR	Novel	2649.1	1747.3	901.8	900	399.6	384.2	248.2	162.8	79.9	300.3	174.1
Sj_Blaster_Grouper_13707_MAP_3	LTR	Novel	2648.5	891.2	1757.3	273.8	774.3	196	381.8	143.3	231.9	278.1	369.3
Sj_Blaster_Grouper_19106_MAP_3	LTR	Novel	2648	1166	1482	490.4	591	254.6	281.1	208.5	310.5	212.5	299.4
Sj_Blaster_Grouper_13712_MAP_5	LTR	Novel	2647.2	658.1	1989.1	191.1	897.6	137.5	390.9	118	254.9	211.5	445.7
Sj_Blaster_Grouper_16478_MAP_4	LTR	Novel	2646.2	1667.2	979	833.6	315.1	191.8	177.8	235.1	161.6	406.7	324.5
Sj_Blaster_Grouper_28686_MAP_3	LTR	Novel	2646.2	1972.5	673.7	876.3	270.5	485.2	203.2	286.7	97.5	324.3	102.5
Sj_Blaster_Grouper_15081_MAP_4	LTR	Novel	2646	848.8	1797.2	292.7	838.2	200.6	362.3	105.9	218.3	249.6	378.4
Sj_Blaster_Grouper_27568_MAP_4	LTR	SACI-7_2p	2644.6	803	1841.6	387.9	731.3	152.2	561.9	73.3	188.6	189.6	359.8
Sj_Blaster_Grouper_19947_MAP_20	LTR	Novel	2643.6	766.8	1876.8	272.7	874.2	172.8	377.9	96.1	225.9	225.2	398.8
Sj_Blaster_Grouper_28328_MAP_3	LTR	Novel	2643.4	1754.1	889.3	888.1	305.4	339.5	207	184.8	126.2	341.7	250.7
Sj_Blaster_Grouper_20483_MAP_20	LTR	Novel	2642.7	1789.2	853.5	847.2	264.1	355.6	215.8	215.9	110.3	370.5	263.3
Sj_Blaster_Grouper_28905_MAP_11	LTR	Novel	2640.2	1037.8	1602.4	378.5	437.8	208.5	407	156.3	260.2	294.5	497.4
Sj_Blaster_Grouper_23975_MAP_4	LTR	Novel	2640.2	917.1	1723.1	309.1	499.7	176.9	414.5	142.8	270.3	288.3	538.6
Sj_Blaster_Grouper_15752_MAP_12	LTR	Novel	2639.6	1655.5	984.1	860.4	556.6	469.9	179.1	158.9	128.5	166.3	119.9
Sj_Blaster_Grouper_16867_MAP_4	LTR	Novel	2638.5	1368.6	1269.9	722.6	619.3	272.3	368.4	185	129.9	188.7	152.3
Sj_Blaster_Grouper_31079_MAP_3	LTR	Novel	2638.1	1244.6	1393.5	488	687	361.6	309.9	127.5	143.1	267.5	253.5
Sj_Blaster_Grouper_29761_MAP_5	LTR	NONAUT-5_1p	2634.7	1285.9	1348.8	423.2	392.8	227.5	303.6	280.9	295.5	354.3	356.9
Sj_Blaster_Grouper_24517_MAP_4	LTR	Novel	2634.4	689.5	1944.9	210.7	819.5	139.5	417.4	115.2	265.3	224.1	442.7
Sj_Blaster_Grouper_23202_MAP_3	LTR	Novel	2633.6	1399.7	1233.9	654.6	467.3	318.1	404.2	157	128.4	270	234
Sj_Blaster_Grouper_25707_MAP_5	LTR	Novel	2632.2	1020.8	1611.4	615.5	654.4	160.2	504.1	61.1	155.7	184	297.2
Sj_Blaster_Grouper_13309_MAP_13	LTR	Novel	2631.8	1625.7	1006.1	845.4	560.6	459.2	188.7	156.5	132.7	164.6	124.1
Sj_Blaster_Grouper_25219_MAP_3	LTR	Novel	2631.5	1598.2	1033.3	831.2	407.3	318.5	262.8	164.2	109.6	284.3	253.6
Sj_Blaster_Grouper_27213_MAP_3	LTR	Novel	2630.9	1370.8	1260.1	489.5	585.8	454.3	288.4	139.8	141	287.2	244.9
Sj_Blaster_Grouper_24133_MAP_20	LTR	Novel	2629.5	1090.3	1539.2	606.2	551.6	183.8	491	85	173.7	215.3	322.9
Sj_Blaster_Grouper_19665_MAP_5	LTR	Novel	2629.5	1410.9	1218.6	525.5	400.9	299.3	304.3	239	187.4	347.1	326
Sj_Blaster_Grouper_16183_MAP_20	LTR	Novel	2629.1	1474.2	1154.9	591.4	459.2	276.8	251.9	300.7	217.7	305.3	226.1
Sj_Blaster_Grouper_28156_MAP_7	LTR	Novel	2627.8	1576.8	1051	194.2	147.4	230.1	137.8	130.7	35.1	1021.8	730.7
Sj_Blaster_Grouper_20505_MAP_4	LTR	Novel	2624.4	1208.1	1416.3	456.8	725.5	378.8	319.1	127.2	141.3	245.3	230.4
Sj_Blaster_Grouper_23569_MAP_3	LTR	Novel	2623.7	1344.6	1279.1	388.4	348.5	223.8	238.8	246.5	251.2	485.9	440.6
Sj_Blaster_Grouper_20423_MAP_4	LTR	Novel	2623.6	1048.5	1575.1	370	525.9	202.6	309.3	111.6	225.8	364.3	514.1
Sj_Blaster_Piler_721.126_MAP_3	LTR	Novel	2623.4	1882.8	740.6	176.4	105.8	267	97.6	151.1	24.6	1288.3	512.6
Sj_Blaster_Grouper_21158_MAP_3	LTR	Novel	2622.2	1885	737.2	553.7	226.4	347.1	172.1	359.8	108.3	624.4	230.4
Sj_Blaster_Grouper_28752_MAP_4	LTR	NONAUT-5_1p	2618	1376.2	1241.8	366.9	356.6	359.9	302.8	220.8	215.3	428.6	367.1
Sj_Blaster_Grouper_20113_MAP_10	LTR	Novel	2617.6	44.4	2573.2	3.5	62.7	10.6	777.5	20.8	713.9	9.5	1019.1
Sj_Blaster_Grouper_32146_MAP_3	LTR	Novel	2617.5	1057.9	1559.6	363	555.8	215.5	291	122.8	212.9	356.6	499.9
Sj_Blaster_Grouper_26318_MAP_5	LTR	Novel	2617.3	810.5	1806.8	443.9	711.8	140.4	567.3	63.1	181.2	163.1	346.5
Sj_Blaster_Grouper_22478_MAP_4	LTR	Novel	2616.9	1529.3	1087.6	428.3	379.4	370.7	215.8	247.9	172	482.4	320.4
Sj_Blaster_Grouper_32057_MAP_3	LTR	Novel	2616.7	1618.3	998.4	606.2	516.7	508.5	181.6	176.8	87.2	326.8	212.9
Sj_Blaster_Grouper_17630_MAP_10	LTR	Novel	2615.2	806	1809.2	246.4	820.8	165.8	373.9	145.7	224.7	248.1	389.8
Sj_Blaster_Grouper_14493_MAP_3	LTR	Novel	2613.8	1418	1195.8	545.6	455.2	278.4	265	290.7	210.5	303.3	265.1
Sj_Blaster_Grouper_19155_MAP_4	LTR	Novel	2613.6	1763.5	850.1	892.1	369.9	493.4	209	178.1	129.8	199.9	141.4
Sj_Blaster_Grouper_5534_MAP_8	LTR	Novel	2612.7	861.5	1751.2	240.1	781.2	252.4	369.3	194.8	366.7	174.2	234
Sj_Blaster_Grouper_24248_MAP_3	LTR	Novel	2611.6	1628.6	983	722.3	392.6	303	247.8	244.4	122.9	358.9	219.7
Sj_Blaster_Grouper_18024_MAP_14	LTR	Novel	2611.5	1185.9	1425.6	518.6	663.2	309.2	298.2	106.1	182.1	252	282.1
Sj_Blaster_Grouper_13292_MAP_5	LTR	Novel	2611.3	668	1943.3	240.3	781.8	177.3	626.2	104.8	238.9	145.6	296.4
Sj_Blaster_Grouper_29385_MAP_9	LTR	Novel	2611.2	1400.4	1210.8	480.1	359.5	221.2	227.4	289.2	213.1	409.9	410.8
Sj_Blaster_Grouper_28014_MAP_13	LTR	Novel	2609.8	1764.2	845.6	936.8	390	240.4	134.2	39.7	17.7	547.3	303.7
Sj_Blaster_Grouper_27117_MAP_6	LTR	Novel	2609.6	1407.9	1201.7	716.8	463.1	301.6	371.4	135.2	121.9	254.3	245.3
Sj_Blaster_Grouper_19633_MAP_3	LTR	Novel	2609.6	1926.3	683.3	886.2	239.1	381.5	143.5	232.2	101.2	426.4	199.5
Sj_Blaster_Grouper_22398_MAP_3	LTR	Novel	2608.7	1017.7	1591	349.9	552.9	215.8	312.6	128	234.3	324	491.2
Sj_Blaster_Grouper_22105_MAP_3	LTR	Novel	2607.4	662.5	1944.9	241	781.4	174.2	627.3	104.3	239.9	143	296.3
Sj_Blaster_Grouper_32546_MAP_20	LTR	Novel	2607	1474.4	1132.6	409.2	416.2	376.9	214.7	232.1	170.2	456.2	331.5
Sj_Blaster_Grouper_22286_MAP_3	LTR	Novel	2605.7	1534.4	1071.3	832.1	426.8	329	288.6	139.8	116.3	233.5	239.6
Sj_Blaster_Grouper_16700_MAP_20	LTR	Novel	2604.7	1860.5	744.2	545.2	225.8	342.6	172.9	355.9	108.7	616.8	236.8
Sj_Blaster_Grouper_6158_MAP_3	LTR	Novel	2603.9	1606.6	997.3	833.4	554.9	457.5	188	153.1	131.6	162.6	122.8
Sj_Blaster_Grouper_18983_MAP_3	LTR	Novel	2603.1	1907.4	695.7	834.5	190.6	406.1	201.4	345.1	134.4	321.7	169.3
Sj_Blaster_Grouper_23818_MAP_3	LTR	Novel	2603.1	1739.6	863.5	799.9	246.2	364	204.4	217.5	131	358.2	281.9
Sj_Blaster_Grouper_27100_MAP_4	LTR	Novel	2602.6	1582.8	1019.8	585	519.3	492.9	192.4	175.5	86	329.4	222.1
Sj_Blaster_Grouper_24971_MAP_20	LTR	Novel	2602.5	1802.8	799.7	880.1	324.4	362.1	179.3	207.6	90.6	353	205.4
Sj_Blaster_Grouper_30074_MAP_3	LTR	Novel	2601	1818.8	782.2	915.3	365.4	412.8	194.3	171.3	67.6	319.4	154.9
Sj_Blaster_Grouper_15410_MAP_4	LTR	Novel	2600.6	1582.8	1017.8	618.1	332.3	320.2	246.7	294.5	178.9	350	259.9
Sj_Blaster_Grouper_16242_MAP_3	LTR	Novel	2599.4	697.1	1902.3	230.4	863.6	136.1	361.7	112.2	245.5	218.4	431.5
Sj_Blaster_Grouper_30544_MAP_20	LTR	Novel	2597.8	1628.8	969	576.9	339.3	316.7	201.9	219.5	100.4	515.7	327.4
Sj_Blaster_Grouper_25013_MAP_3	LTR	Novel	2596.9	685.2	1911.7	224.5	822.5	139.2	417.7	108.7	256.4	212.8	415.1
Sj_Blaster_Grouper_22496_MAP_5	LTR	Novel	2596.8	958	1638.8	330.1	460.2	192.6	403.3	149.5	268.2	285.8	507.1
Sj_Blaster_Grouper_22990_MAP_4	LTR	Novel	2596.2	806.3	1789.9	359.3	946	134.5	252.6	18.6	39.6	293.9	551.7
Sj_Blaster_Grouper_30164_MAP_3	LTR	Novel	2595.8	1053.7	1542.1	447.1	712.3	309.1	359.6	92.2	171.8	205.3	298.4
Sj_Blaster_Grouper_13777_MAP_3	LTR	Novel	2594.7	2023.8	570.9	902.7	174.5	405.5	117.9	260.9	95.7	454.7	182.8
Sj_Blaster_Grouper_17645_MAP_5	LTR	Novel	2593.8	1210.9	1382.9	381.3	524.7	312.7	282.9	195.4	247.1	321.5	328.2
Sj_Blaster_Grouper_18146_MAP_5	LTR	Novel	2592.9	1144.9	1448	485.3	572.4	244.2	267.3	201.3	311.5	214.1	296.8
Sj_Blaster_Grouper_8836_MAP_4	LTR	Novel	2590.5	854.4	1736.1	161.3	733.4	270.9	360	260.1	413.8	162.1	228.9
Sj_Blaster_Grouper_25751_MAP_3	LTR	SACI-7_2p	2590.4	1441.1	1149.3	522.6	632.4	429.9	180.8	161.1	103.3	327.5	232.8
Sj_Blaster_Grouper_28387_MAP_11	LTR	Novel	2589.6	1331.6	1258	384.8	340.8	223.4	233.6	248.7	251.8	474.7	431.8
Sj_Blaster_Grouper_20923_MAP_4	LTR	Novel	2588.4	1074.6	1513.8	349.6	410.2	225.9	385.8	173.7	236.3	325.4	481.5
Sj_Blaster_Grouper_15133_MAP_8	LTR	Novel	2588.3	1063.3	1525	167.3	500.1	317.2	369.6	349.1	385.9	229.7	269.4
Sj_Blaster_Grouper_27330_MAP_5	LTR	Novel	2587.1	1360.3	1226.8	362.6	348.3	352.5	300.3	219.3	213.8	425.9	364.4
Sj_Blaster_Grouper_12253_MAP_15	LTR	Novel	2583.8	645.4	1938.4	233.1	779.2	169.2	625.4	102.4	238.6	140.7	295.2
Sj_Blaster_Grouper_16079_MAP_7	LTR	Novel	2582.3	1053.4	1528.9	391.3	604.4	238.1	288.5	207.8	318.6	216.2	317.4
Sj_Blaster_Grouper_18228_MAP_5	LTR	Novel	2577.2	887.3	1689.9	488.4	679.5	159.7	531.3	65.9	169	173.3	310.1
Sj_Blaster_Grouper_29310_MAP_3	LTR	Novel	2577.1	898.3	1678.8	517.5	655.8	153	523.3	58.6	174	169.2	325.7
Sj_Blaster_Grouper_19973_MAP_8	LTR	Novel	2574.3	1230.5	1343.8	605.2	742.1	352.1	245	125.5	179.1	147.7	177.6
Sj_Blaster_Grouper_21000_MAP_3	LTR	SACI-5_1p	2572.5	1850.5	722	792.1	267	272.6	126.2	216.4	92.7	569.4	236.1
Sj_Blaster_Grouper_21489_MAP_4	LTR	Novel	2572.3	1521.4	1050.9	734	486	334.5	282.2	159.5	91	293.4	191.7
Sj_Blaster_Grouper_23885_MAP_4	LTR	Novel	2572	932.2	1639.8	481.2	608.7	166.6	520.9	79.6	176	204.8	334.2
Sj_Blaster_Grouper_24494_MAP_4	LTR	Novel	2568.1	1792.1	776	909.1	363.7	386.8	182.6	184.8	77	311.4	152.7
Sj_Blaster_Grouper_30847_MAP_3	LTR	Novel	2566.3	1058	1508.3	483.4	762.6	262.9	321.9	96.5	147.4	215.2	276.4
Sj_Blaster_Grouper_15505_MAP_20	LTR	Novel	2562.8	1833.6	729.2	818.1	236.5	372.9	133.1	236	131.3	406.6	228.3
Sj_Blaster_Grouper_26671_MAP_3	LTR	Novel	2562.7	1782.2	780.5	664.9	395.6	544.4	142.5	195	69.7	377.9	172.7
Sj_Blaster_Grouper_21719_MAP_6	LTR	Novel	2561.5	643.4	1918.1	214.4	561	137.7	359.1	93.1	351.5	198.2	646.5
Sj_Blaster_Grouper_15566_MAP_8	LTR	Novel	2559.6	644.2	1915.4	233	777.8	168.8	618.5	102.3	231.1	140.1	288
Sj_Blaster_Grouper_24717_MAP_13	LTR	Novel	2559.4	1746.7	812.7	836.5	292.1	353.8	181.8	205.7	102.2	350.7	236.6
Sj_Blaster_Grouper_22991_MAP_3	LTR	Novel	2557.3	1127.8	1429.5	623.3	518.5	176.3	427	101.3	160.3	226.9	323.7
Sj_Blaster_Grouper_2670_MAP_10	LTR	Novel	2555.6	1586.2	969.4	827.6	542.1	442	179.6	151.6	127.6	165	120.1
Sj_Blaster_Grouper_30781_MAP_3	LTR	Novel	2553.6	1414	1139.6	741.2	492.4	322	276.9	116.2	116.3	234.6	254
Sj_Blaster_Grouper_17006_MAP_3	LTR	Novel	2552.9	1672.9	880	181.3	122.6	247	115.4	136.7	29.6	1107.9	612.4
Sj_Blaster_Grouper_32865_MAP_4	LTR	Novel	2552.5	1547	1005.5	188.4	140.3	222	131.9	126.9	33.4	1009.7	699.9
Sj_Blaster_Grouper_18117_MAP_3	LTR	Novel	2552.5	1794.4	758.1	946.7	310.2	269.8	122.5	38.6	18.9	539.3	306.5
Sj_Blaster_Grouper_25647_MAP_5	LTR	Novel	2552.2	1839.2	713	735.5	366.1	576.5	123.7	183.4	63.1	343.8	160.1
Sj_Blaster_Grouper_18001_MAP_3	LTR	Novel	2549.9	1149.3	1400.6	529.5	509.9	268.3	459.3	121.7	148.9	229.8	282.5
Sj_Blaster_Grouper_20594_MAP_3	LTR	Novel	2547.2	1349.9	1197.3	539.2	506.2	252.5	257.6	279.8	212.1	278.4	221.4
Sj_Blaster_Grouper_23070_MAP_3	LTR	Novel	2546.6	1766.3	780.3	914.8	346	269.2	122.6	40.4	15.6	541.9	296.1
Sj_Blaster_Piler_340.51_MAP_3	LTR	Novel	2546.3	1018.1	1528.2	568.4	551.6	170.1	484.9	78.6	172.9	201	318.8
Sj_Blaster_Grouper_17850_MAP_5	LTR	Novel	2541.9	994.8	1547.1	138.4	188.8	129.6	224.1	33.3	128.6	693.5	1005.6
Sj_Blaster_Grouper_28667_MAP_4	LTR	Novel	2541.4	1205.2	1336.2	348.7	370.6	195.6	242	226	261.2	434.9	462.4
Sj_Blaster_Grouper_30532_MAP_20	LTR	Novel	2541.1	1603.5	937.6	560.7	327.9	311.8	205.9	234.7	104.9	496.3	298.9
Sj_Blaster_Grouper_25393_MAP_3	LTR	Novel	2538.5	735.8	1802.7	388.1	710.1	125.2	565.3	60.9	181.9	161.6	345.4
Sj_Blaster_Grouper_24438_MAP_8	LTR	Novel	2537	1299.4	1237.6	566	419.6	317.9	409.1	151.2	135.6	264.3	273.3
Sj_Blaster_Grouper_12880_MAP_3	LTR	Novel	2536.8	605.1	1931.7	179	879	126.1	380.9	109.5	244.5	190.5	427.3
Sj_Blaster_Grouper_25853_MAP_5	LTR	Novel	2534.7	1443.3	1091.4	541.3	611.4	457.4	182.4	153.2	83.3	291.4	214.3
Sj_Blaster_Grouper_19217_MAP_20	LTR	Novel	2532.8	847.6	1685.2	365.2	892.5	140.9	245.5	19.9	40.8	321.6	506.4
Sj_Blaster_Grouper_25432_MAP_3	LTR	Novel	2531.8	947	1584.8	573.1	649.3	150	493.7	58.4	153.5	165.5	288.3
Sj_Blaster_Grouper_21031_MAP_7	LTR	Novel	2531.4	1554.2	977.2	535.5	334.7	307	203.2	231.6	125.2	480.1	314.1
Sj_Blaster_Grouper_22551_MAP_5	LTR	Novel	2531.2	762.6	1768.6	335	867.2	178.4	364.6	78	200.2	171.2	336.6
Sj_Blaster_Grouper_23712_MAP_6	LTR	Novel	2531.2	1220.6	1310.6	332.3	372.6	226.3	220.4	244.2	248.9	417.8	468.7
Sj_Blaster_Recon_473_MAP_20	LTR	BN000804_1p	2524	882.6	1641.4	342.9	692.5	207.5	480.4	149.5	198.6	182.7	269.9
Sj_Blaster_Grouper_19762_MAP_7	LTR	Novel	2522.5	1762.7	759.8	683.3	408.8	554.6	141.3	183.9	60.7	340.9	149
Sj_Blaster_Grouper_18344_MAP_4	LTR	Novel	2522.2	1176.9	1345.3	369.9	485.2	300	287.1	187.7	235.2	319.3	337.8
Sj_Blaster_Grouper_18300_MAP_3	LTR	Novel	2521.7	1321.4	1200.3	732.4	597.4	241.6	338.4	173.4	121.1	174	143.4
Sj_Blaster_Grouper_4407_MAP_7	LTR	Novel	2521.4	768.8	1752.6	213.3	819.5	220	352.2	179	351.3	156.5	229.6
Sj_Blaster_Grouper_14256_MAP_20	LTR	Novel	2520.7	1769.2	751.5	529	224.5	313.6	174.8	340.8	121.8	585.8	230.4
Sj_Blaster_Grouper_20861_MAP_10	LTR	Novel	2519.7	1120.3	1399.4	363.4	527.3	278.3	289.4	177.5	259.3	301.1	323.4
Sj_Blaster_Grouper_24290_MAP_18	LTR	Novel	2519.6	593.9	1925.7	231	837.8	107.5	325.1	30.3	163.3	225.1	599.5
Sj_Blaster_Grouper_24268_MAP_10	LTR	Novel	2518.7	1215	1303.7	332.5	370.9	225	219.7	241.7	245.2	415.8	467.9
Sj_Blaster_Grouper_25276_MAP_3	LTR	Novel	2518.2	987.3	1530.9	575.1	819.8	166	412.2	126.8	145	119.4	153.9
Sj_Blaster_Grouper_26652_MAP_5	LTR	Novel	2513.5	1771.2	742.3	859.8	244	378	180.6	199.1	108.5	334.3	209.2
Sj_Blaster_Grouper_15249_MAP_5	LTR	Novel	2511.7	1841.9	669.8	850.2	208.3	372.7	162.4	226.7	101	392.3	198.1
Sj_Blaster_Grouper_5004_MAP_4	LTR	Novel	2511.4	1495.1	1016.3	498.2	190.7	368.7	314.8	367.7	302.8	260.5	208
Sj_Blaster_Grouper_21068_MAP_3	LTR	Novel	2509.9	1952.8	557.1	665.4	166.7	478.4	157.4	280.2	75.4	528.8	157.6
Sj_Blaster_Grouper_24891_MAP_4	LTR	Novel	2509.8	1569.1	940.7	793.3	339.1	304.1	218.3	165.1	112.3	306.6	271
Sj_Blaster_Grouper_15614_MAP_9	LTR	Novel	2508.9	558.2	1950.7	161.6	867.9	124.2	360.6	96.2	261.2	176.2	461
Sj_Blaster_Grouper_21673_MAP_3	LTR	Novel	2506.4	1109.3	1397.1	468.8	570	231.5	260.1	192.3	271.1	216.7	295.9
Sj_Blaster_Grouper_32267_MAP_7	LTR	Novel	2504.8	1741.7	763.1	798.8	265.3	390.7	183.3	205.6	106.3	346.6	208.2
Sj_Blaster_Grouper_10739_MAP_5	LTR	Novel	2504.2	559.1	1945.1	167.6	879.3	115.4	389.1	94.1	247.2	182	429.5
Sj_Blaster_Grouper_13430_MAP_3	LTR	Novel	2502.3	924.6	1577.7	313.1	602.8	224.9	327.9	156.9	303.7	229.7	343.3
Sj_Blaster_Grouper_29862_MAP_8	LTR	Novel	2502.2	1296.1	1206.1	449.8	347.7	214.4	227.3	231.6	208	400.3	423.1
Sj_Blaster_Grouper_26957_MAP_4	LTR	Novel	2501	1776.6	724.4	170	98.8	264.8	93.9	144.2	24.6	1197.6	507.1
Sj_Blaster_Grouper_25315_MAP_5	LTR	Novel	2500.6	879.2	1621.4	379.8	842	220.1	331.8	84.1	161.9	195.2	285.7
Sj_Blaster_Grouper_20996_MAP_4	LTR	Novel	2499.5	1305.7	1193.8	483.3	418.7	356.9	322.1	194.7	249.9	270.8	203.1
Sj_Blaster_Grouper_26238_MAP_4	LTR	Novel	2499.5	748.7	1750.8	236.3	811.9	154.8	368.5	128	213	229.6	357.4
Sj_Blaster_Grouper_23201_MAP_5	LTR	Novel	2497.8	1613.7	884.1	760	235.5	340.5	212.9	195.8	144.7	317.4	291
Sj_Blaster_Grouper_29638_MAP_3	LTR	Novel	2497.1	787.3	1709.8	413.8	639.3	152.1	540.2	61.9	181.5	159.5	348.8
Sj_Blaster_Grouper_11917_MAP_20	LTR	Novel	2494.4	557	1937.4	163.3	882.3	116.4	385.5	96.1	242.9	181.2	426.7
Sj_Blaster_Grouper_26095_MAP_3	LTR	Novel	2493.6	1085.4	1408.2	597.4	505.6	167.5	423.1	97.3	159.4	223.2	320.1
Sj_Blaster_Grouper_14727_MAP_3	LTR	Novel	2493.1	1444.2	1048.9	567.9	435.2	275	216.5	297.1	191	304.2	206.2
Sj_Blaster_Grouper_20549_MAP_3	LTR	Novel	2492.3	1383.3	1109	489.1	621.2	419.7	171.1	157.9	97.6	316.6	219.1
Sj_Blaster_Grouper_6859_MAP_7	LTR	Novel	2492.2	937.9	1554.3	549.4	587.2	163.4	476.2	61.8	170.1	163.3	320.8
Sj_Blaster_Grouper_26423_MAP_4	LTR	Novel	2492	1368.4	1123.6	538.4	618.5	396.1	193.1	138.5	88.5	295.4	223.5
Sj_Blaster_Grouper_14055_MAP_3	LTR	Novel	2490.9	1244.2	1246.7	608.6	671.7	361.2	238.8	127	168.5	147.4	167.7
Sj_Blaster_Grouper_15392_MAP_5	LTR	Novel	2489.9	1327.6	1162.3	715.9	576	251.9	329.6	184.4	117.9	175.4	138.8
Sj_Blaster_Piler_793.51_MAP_3	LTR	Novel	2489.8	1372.4	1117.4	520	651	438.2	152.8	142.3	99.2	271.9	214.4
Sj_Blaster_Grouper_32724_MAP_3	LTR	Novel	2488.8	1401.2	1087.6	497.8	598.9	423	167.8	159.6	97.2	320.8	223.7
Sj_Blaster_Grouper_26262_MAP_4	LTR	Novel	2487.3	1711	776.3	843.1	339.1	281.5	126.9	68.4	18.9	518	291.4
Sj_Blaster_Grouper_18679_MAP_3	LTR	Novel	2486.7	1778.7	708	948	296.6	259.6	116.2	35.3	16.4	535.8	278.8
Sj_Blaster_Grouper_24853_MAP_9	LTR	Novel	2485.6	2060.1	425.5	668.4	148.7	526.5	115.9	292.6	52.8	572.6	108.1
Sj_Blaster_Grouper_21633_MAP_3	LTR	Novel	2484.1	714.7	1769.4	316.5	982.9	122	235.1	14.7	44.7	261.5	506.7
Sj_Blaster_Grouper_31301_MAP_3	LTR	Novel	2483.5	1398.3	1085.2	497.4	597.3	421.9	167.5	159.3	97.2	319.7	223.2
Sj_Blaster_Grouper_24992_MAP_6	LTR	Novel	2482.8	1302.4	1180.4	426.1	512.1	439.5	302.7	150.6	139.2	286.2	226.4
Sj_Blaster_Grouper_14431_MAP_5	LTR	Novel	2480.6	722.5	1758.1	290.6	833.2	165.4	355.3	82.6	208.6	183.9	361
Sj_Blaster_Grouper_24055_MAP_12	LTR	Novel	2480.4	1675.1	805.3	609.4	428	531	144.4	181.2	61.2	353.5	171.7
Sj_Blaster_Grouper_12989_MAP_3	LTR	Novel	2479.7	1964.3	515.4	887.2	166.5	389.9	104.2	251.7	84.9	435.5	159.8
Sj_Blaster_Grouper_21747_MAP_3	LTR	Novel	2478.2	1392.4	1085.8	644.9	466.6	290.8	285.3	175.2	96.6	281.5	237.3
Sj_Blaster_Grouper_25637_MAP_5	LTR	Novel	2478.2	1329.5	1148.7	558.1	397.3	259.3	297.1	207.8	184.6	304.3	269.7
Sj_Blaster_Grouper_22306_MAP_20	LTR	Novel	2478	1727.1	750.9	923.4	311.6	252.8	121.3	35.5	18.5	515.4	299.5
Sj_Blaster_Grouper_24606_MAP_17	LTR	Novel	2477.8	727.6	1750.2	323.4	919.6	152	388.4	77.2	157.7	175	284.5
Sj_Blaster_Grouper_9279_MAP_3	LTR	Novel	2476.9	1026.9	1450	460	656.7	265.6	315.7	88	189.3	213.3	288.3
Sj_Blaster_Grouper_21284_MAP_3	LTR	Novel	2476.3	709.4	1766.9	212.5	482.3	164.2	334.3	106.6	351.8	226.1	598.5
Sj_Blaster_Grouper_32986_MAP_15	LTR	Novel	2476	577.4	1898.6	245	812.2	98.7	293.4	28.1	196.7	205.6	596.3
Sj_Blaster_Grouper_25264_MAP_3	LTR	Novel	2475.2	1047.6	1427.6	560.3	515.4	169.5	427.8	96.5	160.1	221.3	324.3
Sj_Blaster_Grouper_19371_MAP_3	LTR	Novel	2472.6	1554.6	918	782.2	329.8	303.9	216.2	168.4	110.3	300.1	261.7
Sj_Blaster_Grouper_30945_MAP_3	LTR	SACI-7_1p	2471.8	1486.4	985.4	679	444.2	240.5	239.3	266.7	131	300.2	170.9
Sj_Blaster_Grouper_11919_MAP_3	LTR	Novel	2471.5	840.9	1630.6	238.9	785.2	237	320.2	182.9	286.1	182.1	239.1
Sj_Blaster_Grouper_16335_MAP_3	LTR	Novel	2469.4	1813.1	656.3	795.2	195.2	374.3	125.1	235.5	120.1	408.1	215.9
Sj_Blaster_Grouper_30001_MAP_20	LTR	Novel	2468.2	828.9	1639.3	402.1	774	193	401.1	66.2	170.1	167.6	294.1
Sj_Blaster_Grouper_7112_MAP_4	LTR	Novel	2468	1511.5	956.5	500.5	164.4	368.5	293.2	374.9	298.7	267.6	200.2
Sj_Blaster_Grouper_16255_MAP_8	LTR	Novel	2467.8	856.4	1611.4	308.4	800.5	196.7	314.7	102.6	175	248.7	321.2
Sj_Blaster_Grouper_21184_MAP_5	LTR	Novel	2466.7	736	1730.7	299.9	683.9	125.4	313.4	41.2	158.9	269.5	574.5
Sj_Blaster_Grouper_20842_MAP_8	LTR	Novel	2466.7	767.5	1699.2	327.3	890.9	134	257.3	22.1	49	284.1	502
Sj_Blaster_Grouper_22282_MAP_3	LTR	Novel	2466.4	1705.8	760.6	172	111.2	227.1	100.8	137.1	24.9	1169.6	523.7
Sj_Blaster_Grouper_27483_MAP_6	LTR	Novel	2466.1	1132.8	1333.3	465.8	560.6	245.1	239.1	197.9	251.7	224	281.9
Sj_Blaster_Grouper_20227_MAP_11	LTR	Novel	2463	632	1831	204.8	835.2	130.9	388.4	104.2	231.6	192.1	375.8
Sj_Blaster_Grouper_34401_MAP_8	LTR	Novel	2462.5	668.3	1794.2	314.3	921.8	164.6	412.1	53.8	160.4	135.6	299.9
Sj_Blaster_Grouper_10072_MAP_4	LTR	Novel	2461.1	1284.3	1176.8	698.7	571.7	239.3	341.9	181.1	121.2	165.2	142
Sj_Blaster_Grouper_19061_MAP_20	LTR	Novel	2460.5	1663.1	797.4	815.8	308.7	324.4	179.2	183.8	92.3	339.1	217.2
Sj_Blaster_Grouper_9522_MAP_4	LTR	Novel	2457.3	954.9	1502.4	163.1	496.9	294	364.6	298.7	374.5	199.1	266.4
Sj_Blaster_Grouper_23294_MAP_3	LTR	Novel	2457.1	1542.1	915	810.2	352.7	304	220.2	156.4	101.2	271.5	240.9
Sj_Blaster_Grouper_21712_MAP_13	LTR	Novel	2455.5	1907	548.5	753.7	174.5	330	138.8	309.8	73	513.5	162.2
Sj_Blaster_Grouper_18210_MAP_8	LTR	Novel	2452.3	1712	740.3	503.3	227.5	307.8	171.9	329.6	115.3	571.3	225.6
Sj_Blaster_Grouper_29319_MAP_3	LTR	Novel	2452	828.2	1623.8	118.8	173.1	109.5	233.7	27.9	129.2	572	1087.8
Sj_Blaster_Grouper_22588_MAP_3	LTR	Novel	2451.8	1032.4	1419.4	552.8	512.6	166	425.5	95.5	159.5	218.1	321.8
Sj_Blaster_Grouper_15377_MAP_20	LTR	Novel	2451.3	955.2	1496.1	368.2	766.9	224.3	295	105.2	157.3	257.5	276.9
Sj_Blaster_Grouper_12743_MAP_4	LTR	Novel	2450.3	591.8	1858.5	149.8	850.3	155.5	377.4	94.4	232.1	192.1	398.7
Sj_Blaster_Grouper_18467_MAP_15	LTR	Novel	2448.5	1183.3	1265.2	324.8	363.5	218.7	212.9	234.5	235.8	405.3	453
Sj_Blaster_Grouper_22523_MAP_9	LTR	Novel	2447.4	883.5	1563.9	323.9	462	170.1	380.8	123.4	244.2	266.1	476.9
Sj_Blaster_Grouper_26043_MAP_3	LTR	Novel	2441.6	1707.4	734.2	160.5	113.2	229.4	102.7	136.2	26.4	1181.3	491.9
Sj_Blaster_Grouper_21687_MAP_3	LTR	Novel	2441.3	1048.1	1393.2	581.5	497.3	158.6	420.9	94	158	214	317
Sj_Blaster_Grouper_29149_MAP_3	LTR	Novel	2440.3	1770.3	670	680.5	354.7	568.5	107.5	180.6	56	340.7	151.8
Sj_Blaster_Grouper_25467_MAP_9	LTR	Novel	2440	1626.9	813.1	611.2	430.4	519.5	146.2	167.1	68.4	329.1	168.1
Sj_Blaster_Grouper_26319_MAP_3	LTR	Novel	2439.9	711.2	1728.7	211.9	777	149.1	360.6	128.4	217.8	221.8	373.3
Sj_Blaster_Grouper_18218_MAP_3	LTR	Novel	2439.8	1564.8	875	174	118.3	238.7	112.4	127.8	28.8	1024.3	615.5
Sj_Blaster_Grouper_15561_MAP_3	LTR	Novel	2437.4	715.1	1722.3	205.4	774.9	154.3	361	124.3	227.1	231.1	359.3
Sj_Blaster_Grouper_31288_MAP_20	LTR	Novel	2436.9	886.2	1550.7	346.7	451.4	174.7	375.1	118.6	255.7	246.2	468.5
Sj_Blaster_Grouper_984_MAP_20	LTR	Novel	2436.5	1523.2	913.3	187.1	127.1	225.3	118.1	123.3	30.6	987.5	637.5
Sj_Blaster_Grouper_28010_MAP_3	LTR	Novel	2436.3	1611.2	825.1	581.1	449.7	521.3	146.1	174.2	60	334.6	169.3
Sj_Blaster_Grouper_30166_MAP_3	LTR	Novel	2435.7	772.8	1662.9	375.9	841.4	181.9	385.4	64.5	156.2	150.5	279.9
Sj_Blaster_Grouper_25515_MAP_5	LTR	Novel	2435	1356.1	1078.9	603.7	444.4	321.5	357.2	156.5	92.8	274.4	184.5
Sj_Blaster_Grouper_15459_MAP_3	LTR	Novel	2434.9	1015.1	1419.8	275.8	315.8	190.5	273.9	134.1	266	414.7	564.1
Sj_Blaster_Grouper_13142_MAP_3	LTR	Novel	2434.8	660.3	1774.5	91.8	159.9	87	266.5	22.2	141.4	459.3	1206.7
Sj_Blaster_Grouper_7156_MAP_14	LTR	Novel	2433.9	1249.9	1184	697.4	580.1	228.1	339.3	164.9	121.5	159.5	143.1
Sj_Blaster_Grouper_13886_MAP_5	LTR	Novel	2433.2	934.6	1498.6	537.7	791.8	159.7	414.3	123.5	141.9	113.7	150.6
Sj_Blaster_Grouper_19860_MAP_3	LTR	Novel	2430.2	722.7	1707.5	311.2	908.7	124.7	251.3	16.6	45	270.2	502.5
Sj_Blaster_Grouper_19541_MAP_3	LTR	Novel	2429.6	1038.1	1391.5	578.7	494.7	155.2	420.5	93.2	158.4	211	317.9
Sj_Blaster_Grouper_14893_MAP_3	LTR	Novel	2429.1	697.7	1731.4	220.3	765.4	127.9	358.9	121	227	228.5	380.1
Sj_Blaster_Grouper_29246_MAP_6	LTR	Novel	2429	1224.4	1204.6	364.5	409.1	270.9	207.7	266.5	266.2	322.5	321.6
Sj_Blaster_Grouper_18083_MAP_3	LTR	Novel	2428.6	943.2	1485.4	546.6	788.6	159.5	405.7	123.5	140.5	113.6	150.6
Sj_Blaster_Grouper_21290_MAP_20	LTR	Novel	2428.4	1753.7	674.7	865	284.2	279.1	109	39.5	16.3	570.1	265.2
Sj_Blaster_Grouper_33217_MAP_4	LTR	Novel	2427.8	1342	1085.8	402.6	357	309.8	235.3	217.9	173	411.7	320.5
Sj_Blaster_Grouper_29219_MAP_3	LTR	Novel	2427.5	1147.9	1279.6	331.6	355.7	190.6	231.1	212.3	249.9	413.4	442.9
Sj_Blaster_Grouper_23415_MAP_7	LTR	Novel	2426.2	1353.2	1073	570.8	366.4	248.7	213.6	134.4	119.1	399.3	373.9
Sj_Blaster_Grouper_24412_MAP_4	LTR	Novel	2424.6	688.7	1735.9	339.7	645.4	147.6	554.5	57.3	181.3	144.1	354.7
Sj_Blaster_Grouper_32465_MAP_3	LTR	Novel	2424.5	1586.9	837.6	580.7	454.5	499.8	163.9	173.9	59.8	332.5	159.4
Sj_Blaster_Grouper_29735_MAP_3	LTR	Novel	2424.2	788.2	1636	276.3	835	186.7	340.1	116.9	175	208.3	285.9
Sj_Blaster_Grouper_29061_MAP_3	LTR	NONAUT-5_1p	2424.1	927.3	1496.8	295.5	455.5	220.9	353.4	142.9	267.2	268	420.7
Sj_Blaster_Grouper_21279_MAP_6	LTR	Novel	2423.1	1135.1	1288	370.6	528.5	305.3	249.1	177.7	209.8	281.5	300.6
Sj_Blaster_Grouper_17251_MAP_20	LTR	Novel	2422.1	1484.8	937.3	787.2	540.7	406.2	159.4	141.1	123.7	150.3	113.5
Sj_Blaster_Grouper_15818_MAP_9	LTR	Novel	2421.6	1486.3	935.3	1054	341.8	133.9	284.3	131.5	133.2	166.9	176
Sj_Blaster_Grouper_21317_MAP_3	LTR	Novel	2421.2	1592.1	829.1	170.3	117.9	215.7	106.6	126	26.3	1080.1	578.3
Sj_Blaster_Grouper_9424_MAP_4	LTR	Novel	2420.2	531.5	1888.7	158.1	862.2	111.5	370.6	91.2	240.2	170.7	415.7
Sj_Blaster_Grouper_28751_MAP_3	LTR	Novel	2418.9	1485.1	933.8	1052.9	341.1	134.2	283.8	131.4	133.1	166.6	175.8
Sj_Blaster_Grouper_24312_MAP_20	LTR	Novel	2417.7	1653.6	764.1	860.3	333.2	243.9	132.2	47.1	19.8	502.3	278.9
Sj_Blaster_Grouper_18645_MAP_7	LTR	Novel	2416.6	1482.5	934.1	1052.4	341.2	133.2	283.9	130.8	133.2	166.1	175.8
Sj_Blaster_Grouper_11615_MAP_20	LTR	Novel	2416.1	1464.2	951.9	565.4	344.9	297.9	205.6	285.1	170.5	315.8	230.9
Sj_Blaster_Grouper_33324_MAP_3	LTR	Novel	2414.2	1527.5	886.7	175	123.2	223.4	115.6	125.9	29.6	1003.2	618.3
Sj_Blaster_Grouper_29747_MAP_3	LTR	Novel	2414	929.1	1484.9	405.4	692.5	245.2	341.2	84.4	164.8	194.1	286.4
Sj_Blaster_Grouper_20384_MAP_6	LTR	Novel	2413.9	1658.5	755.4	632.3	229.9	354	185.7	231.2	106.9	441	232.9
Sj_Blaster_Grouper_13756_MAP_4	LTR	Novel	2413	580.1	1832.9	183.7	845.4	115.3	352.2	95.9	230	185.2	405.3
Sj_Blaster_Grouper_20851_MAP_20	LTR	Novel	2412.7	1682.9	729.8	897.4	298	241.7	122.6	38.3	19	505.5	290.2
Sj_Blaster_Grouper_29022_MAP_6	LTR	BEL14_AGp	2412.4	1481.3	931.1	1051.1	340.8	133.6	283.3	131	132.5	165.6	174.5
Sj_Blaster_Grouper_16274_MAP_7	LTR	Novel	2412.4	933	1479.4	537.7	783.2	158.9	405.2	123.3	141	113.1	150
Sj_Blaster_Grouper_11719_MAP_4	LTR	Novel	2410.7	586.3	1824.4	163.6	829.7	125.6	377.1	105.2	234.7	191.9	382.9
Sj_Blaster_Grouper_29008_MAP_8	LTR	Novel	2410.5	1440.6	969.9	432.6	345.4	353.4	187.3	210.6	151.5	444	285.7
Sj_Blaster_Grouper_14530_MAP_8	LTR	Novel	2409.3	1566.3	843	731.6	298.5	199.6	148.1	229.6	124	405.5	272.4
Sj_Blaster_Grouper_21301_MAP_8	LTR	Novel	2407.7	1219.6	1188.1	492.4	698.4	371.2	199.7	119	78.1	237	211.9
Sj_Blaster_Grouper_32547_MAP_15	LTR	Novel	2407.6	1361	1046.6	406.3	368	315.3	218.9	224.1	154.8	415.3	304.9
Sj_Blaster_Grouper_25906_MAP_5	LTR	Novel	2407.2	1252.9	1154.3	354.7	316.6	203.3	211.5	240.6	230	454.3	396.2
Sj_Blaster_Grouper_12584_MAP_4	LTR	Novel	2406.6	1412.7	993.9	739.3	476.8	309.1	128.5	107.5	190.1	256.8	198.5
Sj_Blaster_Grouper_21088_MAP_3	LTR	Novel	2405.5	1498.7	906.8	179.3	127.7	210.8	118.1	122.7	30.3	985.9	630.7
Sj_Blaster_Grouper_17743_MAP_3	LTR	Novel	2405.1	651.1	1754	278.6	937.3	104.1	255.3	14.6	35.1	253.8	526.3
Sj_Blaster_Grouper_29740_MAP_5	LTR	Novel	2404.6	685.3	1719.3	322.2	860.1	165.5	408.4	55.2	158.5	142.4	292.3
Sj_Blaster_Grouper_21362_MAP_3	LTR	Novel	2403.9	880.9	1523	123	174.7	115.4	223.1	29.6	124.4	612.9	1000.8
Sj_Blaster_Grouper_3551_MAP_3	LTR	Novel	2403	912.7	1490.3	162	496.4	280.9	364.5	280.3	367.2	189.5	262.2
Sj_Blaster_Grouper_24491_MAP_4	LTR	Novel	2401.5	775.8	1625.7	385.5	588	148	503.1	72.1	181.3	170.2	353.3
Sj_Blaster_Grouper_26888_MAP_3	LTR	Novel	2400.6	748.2	1652.4	284.2	720.1	123.4	284.2	59.1	151.5	281.5	496.6
Sj_Blaster_Grouper_22954_MAP_4	LTR	Novel	2400.2	1224.4	1175.8	499	498.4	211.1	252	261.2	209.6	253.1	215.8
Sj_Blaster_Grouper_14921_MAP_3	LTR	Novel	2399	1055.9	1343.1	433.3	539.3	223.8	257.1	191.5	270.2	207.3	276.5
Sj_Blaster_Grouper_19315_MAP_4	LTR	Novel	2397.9	1468.5	929.4	1043.5	340.5	131	282.8	129.4	132.1	164.6	174
Sj_Blaster_Grouper_24565_MAP_12	LTR	Novel	2397.1	1846.8	550.3	894	236.3	386.5	122.7	209.2	62.4	357.1	128.9
Sj_Blaster_Grouper_29325_MAP_5	LTR	Novel	2396	747.5	1648.5	395.5	639.6	128.5	524.3	61	169.5	162.5	315.1
Sj_Blaster_Grouper_14583_MAP_3	LTR	Novel	2394.4	927.4	1467	534.4	776.4	158	403.2	122.7	139.3	112.3	148.1
Sj_Blaster_Grouper_25052_MAP_18	LTR	Novel	2393.8	1597.9	795.9	821.9	332.8	317.4	185.7	165.1	83.9	293.5	193.5
Sj_Blaster_Grouper_26858_MAP_3	LTR	Novel	2393.3	873.2	1520.1	122.1	174.2	115	221.6	29.5	124.6	606.6	999.7
Sj_Blaster_Grouper_25198_MAP_20	LTR	Novel	2393.1	1611.7	781.4	692.4	283.9	271.8	130.1	151	78.7	496.5	288.7
Sj_Blaster_Grouper_28375_MAP_3	LTR	Novel	2392.2	1609.1	783.1	753.8	234.1	343.8	191.2	194.9	123.8	316.6	234
Sj_Blaster_Grouper_27520_MAP_20	LTR	Novel	2392	658.1	1733.9	342.1	677.1	110.5	553.9	55.9	176.4	149.6	326.5
Sj_Blaster_Grouper_10638_MAP_4	LTR	Novel	2388.7	1468.8	919.9	562.1	328	300.9	199.5	289.7	167.6	316.1	224.8
Sj_Blaster_Grouper_32743_MAP_6	LTR	Novel	2388.2	1579.9	808.3	578.8	440.3	509.1	139.3	170	60.9	322	167.8
Sj_Blaster_Grouper_23686_MAP_4	LTR	Novel	2388.2	2343.7	44.5	55.8	3.9	684.1	11.6	633.6	20	970.2	9
Sj_Blaster_Grouper_24937_MAP_9	LTR	Novel	2385.4	1496.4	889	737	428.3	326.6	202.5	159.2	78.5	273.6	179.7
Sj_Blaster_Grouper_19867_MAP_3	LTR	Novel	2385.2	1451.9	933.3	173.4	126.7	225.4	121.1	123.3	31.1	929.8	654.4
Sj_Blaster_Grouper_21820_MAP_3	LTR	Novel	2384.5	1533.4	851.1	179.4	111.9	226.7	105.5	122.2	28.4	1005.1	605.3
Sj_Blaster_Grouper_10541_MAP_4	LTR	Novel	2382.9	1455.6	927.3	769.1	534.6	401.8	157.4	137.3	122.7	147.4	112.6
Sj_Blaster_Grouper_31745_MAP_20	LTR	Novel	2380.2	1588.4	791.8	821.8	343	316.2	194	162.9	78.7	287.5	176.1
Sj_Blaster_Grouper_22988_MAP_4	LTR	Novel	2379.7	1257	1122.7	487.1	629.6	390	196.6	126.3	103.3	253.6	193.2
Sj_Blaster_Grouper_26755_MAP_4	LTR	Novel	2379.3	912.3	1467	292.7	387.4	189	368.7	151.2	237.5	279.4	473.4
Sj_Blaster_Grouper_33899_MAP_4	LTR	SACI-7_2p	2378.3	1656.4	721.9	640.5	395.3	526.2	117	172.6	56.7	317.1	152.9
Sj_Blaster_Grouper_18644_MAP_4	LTR	Novel	2376.3	580.5	1795.8	78.4	162.4	73.3	249.8	19.7	142	409.1	1241.6
Sj_Blaster_Grouper_4802_MAP_20	LTR	Novel	2373.8	922	1451.8	531	766.1	157.4	401.7	121.9	136.8	111.7	147.2
Sj_Blaster_Grouper_27943_MAP_14	LTR	Novel	2373.4	1728.2	645.2	853.9	254.1	359.7	160.6	185.5	74.1	329.1	156.4
Sj_Blaster_Grouper_24852_MAP_3	LTR	Novel	2372.9	755.3	1617.6	311.3	846.6	194.9	327.2	77.7	162.1	171.4	281.7
Sj_Blaster_Grouper_6504_MAP_5	LTR	Novel	2372	1450	922	765.4	532.2	401.2	156.8	136.6	121.8	146.8	111.2
Sj_Blaster_Grouper_24093_MAP_3	LTR	Novel	2371.1	1569.2	801.9	620.8	410	482.6	141.7	162.3	70.1	303.5	180.1
Sj_Blaster_Grouper_13276_MAP_3	LTR	Novel	2370.5	1416.3	954.2	640.3	417.4	305.4	251.3	189	82.8	281.6	202.7
Sj_Blaster_Grouper_18053_MAP_4	LTR	Novel	2369.4	1222.2	1147.2	337	397.6	299.3	220.5	197.7	187.8	388.2	341.3
Sj_Blaster_Grouper_30035_MAP_3	LTR	Novel	2368.5	1475.2	893.3	657.6	428	352.7	211.9	168	79.2	296.9	174.2
Sj_Blaster_Grouper_17611_MAP_20	LTR	Novel	2368.4	688.5	1679.9	355.1	641.9	121.4	538.9	58.2	175.8	153.8	323.3
Sj_Blaster_Grouper_24876_MAP_7	LTR	Novel	2368.3	1054	1314.3	591.1	478.1	158.2	416.2	91.4	141.7	213.3	278.3
Sj_Blaster_Grouper_11521_MAP_3	LTR	Novel	2367.2	1905.1	462.1	869.6	152.6	380.2	90.2	243.7	72.9	411.6	146.4
Sj_Blaster_Grouper_28906_MAP_8	LTR	Novel	2364.6	1199.6	1165	358.6	395.2	263.2	201.7	261.3	257.3	316.5	310.8
Sj_Blaster_Grouper_27574_MAP_3	LTR	Novel	2363.3	716.1	1647.2	390.1	683.4	123.6	503.3	55.5	162.7	146.9	297.8
Sj_Blaster_Grouper_27716_MAP_7	LTR	Novel	2363	1051.2	1311.8	484	505.7	193.8	306	109	168.3	264.4	331.8
Sj_Blaster_Grouper_21173_MAP_20	LTR	Novel	2362.1	881.7	1480.4	310.7	513.6	188.1	284.5	99.6	213.6	283.3	468.7
Sj_Blaster_Grouper_28021_MAP_7	LTR	Novel	2361.5	1198.3	1163.2	332.7	317.6	190.4	214	235.6	231.6	439.6	400
Sj_Blaster_Grouper_34779_MAP_9	LTR	Novel	2360.5	973.2	1387.3	282.9	460.5	183.9	239.3	168.7	280.9	337.7	406.6
Sj_Blaster_Grouper_34344_MAP_3	LTR	Novel	2360	784.1	1575.9	362.1	830.5	198.4	344.4	68.3	146	155.3	255
Sj_Blaster_Grouper_19340_MAP_20	LTR	Novel	2359.2	1444.6	914.6	491.4	270.3	296.9	193.2	217	112.6	439.3	338.5
Sj_Blaster_Grouper_14782_MAP_20	LTR	Novel	2359	638.6	1720.4	191.3	779.9	121.9	354.4	113.2	218.8	212.2	367.3
Sj_Blaster_Grouper_26070_MAP_3	LTR	SACI-7_2p	2356.2	979.8	1376.4	526.1	489.1	152.9	417.8	89.7	156.9	211.1	312.6
Sj_Blaster_Grouper_31502_MAP_10	LTR	Novel	2355.9	1523.1	832.8	410.3	257.2	331.7	166.2	217.2	103.9	563.9	305.5
Sj_Blaster_Grouper_30429_MAP_3	LTR	Novel	2355.1	1373.2	981.9	487.8	523.3	416.7	155.5	156.8	90.4	311.9	212.7
Sj_Blaster_Grouper_18201_MAP_4	LTR	Novel	2353.6	1298.1	1055.5	359.8	384.2	331.4	191.1	206.1	160.7	400.8	319.5
Sj_Blaster_Grouper_18632_MAP_3	LTR	Novel	2352.3	1740.4	611.9	956.3	274.5	244.8	94.5	37.4	12.9	501.9	230
Sj_Blaster_Grouper_19548_MAP_9	LTR	Novel	2352.3	1204.6	1147.7	341.3	307.9	197.7	214.2	230.2	229	435.4	396.6
Sj_Blaster_Grouper_25564_MAP_20	LTR	Novel	2345.9	667.2	1678.7	290.5	638.8	141.8	536.5	66.9	171.2	168	332.2
Sj_Blaster_Grouper_32131_MAP_20	LTR	Novel	2345.8	764.7	1581.1	319.7	787.8	130.6	253.8	30.1	86.6	284.3	452.9
Sj_Blaster_Grouper_5057_MAP_6	LTR	Novel	2343.9	776	1567.9	433.9	575.5	144.4	500.4	52.6	172.8	145.1	319.2
Sj_Blaster_Grouper_25941_MAP_20	LTR	Novel	2342.6	1105.8	1236.8	419	565.5	380.2	290.1	100.1	140.2	206.5	241
Sj_Blaster_Grouper_26752_MAP_3	LTR	Novel	2342.1	1461.8	880.3	521.8	501.9	466.4	144.7	167.9	66.7	305.7	167
Sj_Blaster_Grouper_8183_MAP_4	LTR	Novel	2341.8	1133.8	1208	285	614.5	379.5	225.3	236.2	216.9	233.1	151.3
Sj_Blaster_Grouper_23458_MAP_3	LTR	NONAUT-5_1p	2340.3	690.6	1649.7	252.3	809.4	160.2	329.6	77.8	191.3	200.3	319.4
Sj_Blaster_Grouper_25236_MAP_3	LTR	Novel	2339.8	1038.2	1301.6	584.2	471.8	153.3	413.9	90.2	140.6	210.5	275.3
Sj_Blaster_Grouper_21012_MAP_3	LTR	Novel	2338.9	816.4	1522.5	306.5	432.7	159.7	374.1	120	243.7	230.2	472
Sj_Blaster_Grouper_26104_MAP_3	LTR	Novel	2338.3	969.6	1368.7	519.4	486.7	151.7	415.5	89.2	156.3	209.3	310.2
Sj_Blaster_Grouper_24530_MAP_6	LTR	Novel	2336.1	1498.2	837.9	169	117.9	215.5	110.4	122	28.1	991.7	581.5
Sj_Blaster_Piler_889.2_MAP_3	LTR	Novel	2335	1589.7	745.3	497	221.5	290.2	169.3	306.7	113.7	495.8	240.8
Sj_Blaster_Grouper_25573_MAP_6	LTR	Novel	2332.7	1398.7	934	654.9	407.6	252.9	231.1	198.1	90	292.8	205.3
Sj_Blaster_Grouper_29388_MAP_3	LTR	Novel	2330.7	1576.6	754.1	541.2	249.2	309.2	157.5	238.7	108.6	487.5	238.8
Sj_Blaster_Grouper_28919_MAP_4	LTR	Novel	2328.9	1269.1	1059.8	505.9	600.2	382.3	174.7	127.9	80.4	253	204.5
Sj_Blaster_Grouper_19644_MAP_5	LTR	Novel	2326.6	608	1718.6	253.3	864	100.7	268.1	14.1	36.9	239.9	549.6
Sj_Blaster_Grouper_29253_MAP_4	LTR	Novel	2325.7	1697.9	627.8	768.3	176.6	368.4	146.4	212.7	103.6	348.5	201.2
Sj_Blaster_Grouper_16859_MAP_5	LTR	Novel	2323.5	1117.9	1205.6	343.9	451.5	288.7	248.9	181	209.1	304.3	296.1
Sj_Blaster_Grouper_22135_MAP_4	LTR	Novel	2322.5	1381.4	941.1	173.2	128.8	206.2	121.6	114.7	31.4	887.3	659.3
Sj_Blaster_Grouper_15868_MAP_3	LTR	Novel	2320.8	600.5	1720.3	248.9	920.2	97.7	249	14.4	35.3	239.5	515.8
Sj_Blaster_Grouper_27099_MAP_4	LTR	Novel	2320.1	1262.9	1057.2	352.3	374.6	323.5	200.3	197.2	167.9	389.9	314.4
Sj_Blaster_Grouper_23510_MAP_4	LTR	Novel	2319.5	753.1	1566.4	415	574.1	128.6	497.6	56.2	168.9	153.3	325.8
Sj_Blaster_Grouper_29682_MAP_6	LTR	Novel	2317.7	1450.6	867.1	393.3	341.7	364.2	169.1	243.1	122.2	450	234.1
Sj_Blaster_Grouper_20533_MAP_4	LTR	Novel	2316.9	1640.5	676.4	599.6	323.7	506.4	131.2	180.2	65.8	354.3	155.7
Sj_Blaster_Grouper_17081_MAP_3	LTR	Novel	2314.2	1627.4	686.8	883.5	283.9	235.2	112.3	33.3	16.7	475.4	273.9
Sj_Blaster_Grouper_18773_MAP_3	LTR	Novel	2312.7	665.6	1647.1	284.3	813.4	98.1	259.1	15.5	35	267.7	539.6
Sj_Blaster_Grouper_28302_MAP_8	LTR	Novel	2309.8	1675.2	634.6	773.5	189	351.6	139	208.6	101.4	341.5	205.2
Sj_Blaster_Grouper_26087_MAP_3	LTR	Novel	2307.5	702.3	1605.2	259.3	792.2	156.1	340	103.3	178.2	183.6	294.8
Sj_Blaster_Grouper_34990_MAP_3	LTR	SACI-7_2p	2305.8	1529.4	776.4	558.3	424.8	489.4	140.2	167.1	59.5	314.6	151.9
Sj_Blaster_Grouper_20746_MAP_3	LTR	Novel	2305.4	842.3	1463.1	116.7	173.1	107.7	203.7	28.2	119	589.7	967.3
Sj_Blaster_Grouper_32830_MAP_3	LTR	Novel	2304.3	1461.2	843.1	531.4	426.1	467.3	165.2	157.4	72.7	305.1	179.1
Sj_Blaster_Grouper_24511_MAP_4	LTR	Novel	2304.2	1622.3	681.9	868.8	305.3	240.6	113.1	43.4	18	469.5	245.5
Sj_Blaster_Grouper_9647_MAP_7	LTR	Novel	2303.7	466.2	1837.5	144.6	847.3	98.2	361.1	77.7	231.3	145.7	397.8
Sj_Blaster_Grouper_26531_MAP_3	LTR	Novel	2299.9	1460.1	839.8	444.7	188.2	373.4	208.7	322.7	230	319.3	212.9
Sj_Blaster_Grouper_19546_MAP_20	LTR	Novel	2299.8	1660.5	639.3	899.6	275.1	237.4	101.1	34.2	14.2	489.3	248.9
Sj_Blaster_Grouper_25699_MAP_13	LTR	Novel	2299.5	1103.6	1195.9	644.8	470.2	176.5	367.3	79.5	122.4	202.8	236
Sj_Blaster_Grouper_29042_MAP_10	LTR	Novel	2297.2	1157.4	1139.8	388.8	329.7	181	213.1	236.9	202.2	350.7	394.8
Sj_Blaster_Grouper_8815_MAP_4	LTR	Novel	2296.8	436.9	1859.9	144.5	857.3	88.9	368.4	71.3	235	132.2	399.2
Sj_Blaster_Grouper_13924_MAP_13	LTR	Novel	2296.7	1702.8	593.9	909.5	246.9	249	96.2	34.2	14	510.1	236.8
Sj_Blaster_Grouper_29633_MAP_11	LTR	Novel	2296.5	1142.7	1153.8	398.3	334.4	191.7	216.5	204.2	200.5	348.5	402.4
Sj_Blaster_Grouper_14130_MAP_4	LTR	Novel	2295.7	635.1	1660.6	189.2	754.5	130.6	344.8	107.7	212.2	207.6	349.1
Sj_Blaster_Piler_808.51_MAP_3	LTR	Novel	2295.3	932.3	1363	503.5	484.6	142.8	414.3	86	155.4	200	308.7
Sj_Blaster_Grouper_18393_MAP_12	LTR	Novel	2295.2	744.7	1550.5	305.3	812.2	121.1	241.7	18.3	33.2	300	463.4
Sj_Blaster_Grouper_11761_MAP_9	LTR	Novel	2294.5	830.2	1464.3	283.3	570.5	193.3	295.9	143.8	275.8	209.8	322.1
Sj_Blaster_Grouper_20639_MAP_20	LTR	Novel	2290.9	732.2	1558.7	289.2	816.4	175.5	304.8	79.4	159.4	188.1	278.1
Sj_Blaster_Grouper_12238_MAP_4	LTR	Novel	2290.7	1330.6	960.1	494.2	345.9	276.4	213.3	267.4	172.3	292.6	228.6
Sj_Blaster_Grouper_25698_MAP_5	LTR	Novel	2290.6	1484.2	806.4	747.9	361.2	340.9	215.8	150.5	74.6	244.9	154.8
Sj_Blaster_Grouper_1230_MAP_10	LTR	Novel	2289.2	899	1390.2	514.9	747.8	154.4	378.7	120	127.7	109.7	136
Sj_Blaster_Grouper_24826_MAP_8	LTR	Novel	2286.9	1365.4	921.5	537.3	347.8	266.9	229.4	227.1	119.7	334.1	224.6
Sj_Blaster_Grouper_15528_MAP_10	LTR	Novel	2285.3	1286.7	998.6	594.1	445.4	276.8	265.6	157.2	79.8	258.6	207.8
Sj_Blaster_Grouper_23906_MAP_4	LTR	Novel	2285	1658.6	626.4	846.7	294.3	344.7	141.9	171.1	61.3	296.1	128.9
Sj_Blaster_Grouper_8386_MAP_3	LTR	Novel	2284	934.3	1349.7	156	396.7	290.9	342.5	293.2	366.7	194.2	243.8
Sj_Blaster_Grouper_18539_MAP_5	LTR	Novel	2283.7	1378.7	905	560.5	485.9	417.8	153.9	136.8	71.6	263.6	193.6
Sj_Blaster_Grouper_28215_MAP_3	LTR	NONAUT-5_1p	2281.9	917.8	1364.1	278.6	461.5	165.8	215.6	160.4	271.8	313	415.2
Sj_Blaster_Grouper_11122_MAP_3	LTR	Novel	2280	1233.1	1046.9	554.3	465.7	282	275.6	144	85	252.8	220.6
Sj_Blaster_Grouper_23336_MAP_10	LTR	Novel	2279.8	1090.6	1189.2	631	538.6	201.1	296	72	109.3	186.5	245.3
Sj_Blaster_Grouper_28103_MAP_4	LTR	Novel	2275.7	1097.2	1178.5	318.8	386.9	196.9	187.2	193.1	239.5	388.4	364.9
Sj_Blaster_Grouper_18409_MAP_6	LTR	Novel	2275.6	1322	953.6	454.7	235.4	347.3	271.1	238.1	215.4	281.9	231.7
Sj_Blaster_Grouper_24007_MAP_6	LTR	Novel	2275.5	573.6	1701.9	240	861.1	138.1	369.7	62.8	176.4	132.7	294.7
Sj_Blaster_Grouper_13941_MAP_20	LTR	Novel	2275.5	1254.8	1020.7	493.6	422.3	228.4	215.4	269.2	191.2	263.6	191.8
Sj_Blaster_Grouper_17169_MAP_4	LTR	Novel	2273.7	1401.6	872.1	166.1	123.1	210.4	115.8	112.2	29.5	912.9	603.7
Sj_Blaster_Grouper_21763_MAP_4	LTR	Novel	2273.2	913.4	1359.8	336	1002.6	277.4	107.5	130.5	109.7	169.5	140
Sj_Blaster_Grouper_34431_MAP_11	LTR	Novel	2273	2218.8	54.2	55.2	4.4	678.2	14	572.6	24.6	912.8	11.2
Sj_Blaster_Piler_467.51_MAP_3	LTR	Novel	2269.9	1296.3	973.6	677.2	447.2	232.6	276.2	129.1	78.2	257.4	172
Sj_Blaster_Grouper_22229_MAP_4	LTR	Novel	2268.2	1534.6	733.6	799.5	331.9	339.1	189.1	143.6	65.7	252.4	146.9
Sj_Blaster_Grouper_29187_MAP_5	LTR	Novel	2268.1	1101.4	1166.7	325.7	319.9	189.4	214	202.2	205.9	384.1	426.9
Sj_Blaster_Grouper_16360_MAP_6	LTR	Novel	2266.7	611.3	1655.4	262.3	914.4	95.4	231.2	12.9	32.8	240.7	477
Sj_Blaster_Grouper_11664_MAP_3	LTR	Novel	2266.6	1735.6	531	767.1	161.1	370.4	104.7	228.2	91.2	369.9	174
Sj_Blaster_Grouper_24683_MAP_5	LTR	Novel	2265.3	1140.2	1125.1	315.9	315.3	209.2	178.1	222.2	230.9	392.9	400.8
Sj_Blaster_Grouper_29316_MAP_9	LTR	Novel	2265.1	918.4	1346.7	536.8	499.9	152.4	442.7	57.6	139.7	171.6	264.4
Sj_Blaster_Grouper_27767_MAP_3	LTR	Novel	2262.4	1121.9	1140.5	329.8	384.1	251.8	204.1	247.8	251	292.5	301.3
Sj_Blaster_Grouper_22025_MAP_5	LTR	Novel	2260.8	1567.4	693.4	819.5	327.2	227.4	105.7	35.8	11.6	484.7	248.9
Sj_Blaster_Grouper_20212_MAP_3	LTR	Novel	2260.3	1420.7	839.6	167.5	112.4	215.5	106.8	114.7	28.1	923	592.3
Sj_Blaster_Grouper_15732_MAP_15	LTR	Novel	2260.2	1111.5	1148.7	308.7	320.3	203.8	183	217.3	222.6	381.7	422.8
Sj_Blaster_Grouper_16730_MAP_20	LTR	Novel	2258.3	1273.8	984.5	347.6	371	327	170.8	201.4	149	397.8	293.7
Sj_Blaster_Grouper_17021_MAP_20	LTR	Novel	2257.6	1637.9	619.7	898.2	263.1	229.6	99.8	32.9	14	477.2	242.8
Sj_Blaster_Grouper_11118_MAP_5	LTR	Novel	2256.4	1428.9	827.5	519.6	282.3	310.3	192	278.3	145	320.7	208.2
Sj_Blaster_Grouper_3277_MAP_8	LTR	Novel	2254.2	1083.1	1171.1	274.9	607.9	364.6	217.2	234.5	212.2	209.1	133.8
Sj_Blaster_Grouper_18629_MAP_20	LTR	Novel	2254.2	1007	1247.2	597.8	532.8	175.6	326.1	64	126.4	169.6	261.9
Sj_Blaster_Grouper_16970_MAP_3	LTR	Novel	2252.8	1226.2	1026.6	346.2	281.6	200.9	191.8	233.7	200.7	445.4	352.5
Sj_Blaster_Grouper_17007_MAP_5	LTR	Novel	2252.7	968	1284.7	433.6	597.9	258.5	273.7	77.8	162.5	198.1	250.6
Sj_Blaster_Grouper_27094_MAP_8	LTR	Novel	2251.9	1592.9	659	582.6	367.6	517.8	117.7	168.6	47.8	323.9	125.9
Sj_Blaster_Grouper_28280_MAP_3	LTR	Novel	2251.7	1690.2	561.5	737.6	234	418.8	169.2	246.9	81.6	286.9	76.7
Sj_Blaster_Grouper_25710_MAP_5	LTR	Novel	2249.4	640.2	1609.2	185.4	751.1	132.2	346.7	116.4	193.5	206.2	317.9
Sj_Blaster_Grouper_27886_MAP_10	LTR	Novel	2249.3	1187	1062.3	385.9	288.2	202.5	205.7	217.7	190.5	380.9	377.9
Sj_Blaster_Grouper_25668_MAP_3	LTR	Novel	2248.9	1134.3	1114.6	310.1	303.9	181.3	206.1	226.3	221.8	416.6	382.8
Sj_Blaster_Grouper_27263_MAP_13	LTR	Novel	2248.4	1120.3	1128.1	382	323.8	189.7	209.8	203.1	199.5	345.5	395
Sj_Blaster_Piler_434.2_MAP_3	LTR	Novel	2247.1	592	1655.1	264.4	912.2	91.8	226.2	12.4	35.1	223.4	481.6
Sj_Blaster_Grouper_18153_MAP_8	LTR	Novel	2244.6	1517.6	727	799.6	321.6	216.6	120.9	37	17.7	464.4	266.8
Sj_Blaster_Grouper_27813_MAP_3	LTR	Novel	2242.7	1311	931.7	363.3	288.3	311.3	183.8	217	156.6	419.4	303
Sj_Blaster_Grouper_25931_MAP_3	LTR	Novel	2240.6	701.3	1539.3	221.1	746.9	155.8	322.5	116	174.2	208.4	295.7
Sj_Blaster_Grouper_25779_MAP_4	LTR	Novel	2239.9	788.3	1451.6	443.4	539.9	125.9	463.9	58.5	151.8	160.5	296
Sj_Blaster_Grouper_29785_MAP_6	LTR	Novel	2239.2	1341.7	897.5	154.7	126.4	193.7	120.9	107.5	29.5	885.8	620.7
Sj_Blaster_Grouper_10802_MAP_20	LTR	Novel	2237.8	1313.9	923.9	449.4	281.9	339.6	254.8	255.6	197.4	269.3	189.8
Sj_Blaster_Grouper_10689_MAP_3	LTR	Novel	2236.9	827	1409.9	302.2	555.7	175.5	280.5	148.5	280.9	200.8	292.8
Sj_Blaster_Grouper_15283_MAP_3	LTR	Novel	2236.7	1519.2	717.5	154.8	98	229.5	92.8	122.9	23.8	1012	502.9
Sj_Blaster_Grouper_23840_MAP_3	LTR	Novel	2236.4	1562.9	673.5	862.9	311.4	213.4	107.9	44.1	12.6	442.5	241.6
Sj_Blaster_Grouper_21043_MAP_20	LTR	Novel	2234.5	743	1491.5	336.6	793.3	120.8	215.8	15.8	44.2	269.8	438.2
Sj_Blaster_Grouper_28805_MAP_3	LTR	Novel	2230.9	1422.1	808.8	382.1	257.5	372.7	175.2	220.9	132.8	446.4	243.3
Sj_Blaster_Grouper_25774_MAP_3	LTR	Novel	2230.8	802.4	1428.4	367.4	633.9	197	339.4	71.9	166.6	166.1	288.5
Sj_Blaster_Grouper_29273_MAP_5	LTR	Novel	2228.1	1499.1	729	150.1	104.4	219	95.5	119.5	23.9	1010.5	505.2
Sj_Blaster_Grouper_9588_MAP_4	LTR	Novel	2227	1631.8	595.2	427.6	205	517	168.3	350.8	123.6	336.4	98.3
Sj_Blaster_Grouper_17591_MAP_3	LTR	Novel	2225.8	1564.5	661.3	819	254.9	239.8	112.4	33.7	18.1	472	275.9
Sj_Blaster_Grouper_29555_MAP_20	LTR	Novel	2225.7	708	1517.7	382.4	606.6	115.9	482.8	58.5	149.6	151.2	278.7
Sj_Blaster_Grouper_13470_MAP_20	LTR	Novel	2222.9	1190.8	1032.1	479.6	430.4	230.1	218.2	239.2	187.4	241.9	196.1
Sj_Blaster_Grouper_25428_MAP_5	LTR	Novel	2222.4	612.1	1610.3	208	794.1	140.5	349.3	96.1	179.4	167.5	287.5
Sj_Blaster_Grouper_25726_MAP_4	LTR	Novel	2222	1415.1	806.9	156.8	107.7	220.5	102.9	116.8	26.9	921	569.4
Sj_Blaster_Grouper_21399_MAP_6	LTR	Novel	2220.9	1828.6	392.3	856	139.6	361.7	94.7	224.5	47.9	386.4	110.1
Sj_Blaster_Grouper_27619_MAP_3	LTR	SACI-7_2p	2219.1	1117.7	1101.4	588.8	556.7	199	269.4	112.4	83.7	217.5	191.6
Sj_Blaster_Grouper_23610_MAP_5	LTR	Novel	2216	1399.5	816.5	453.1	219.8	347.8	202.3	303	209.4	295.6	185
Sj_Blaster_Grouper_25397_MAP_9	LTR	Novel	2215.4	1558.8	656.6	754.4	233	357.2	157.1	171	91.4	276.2	175.1
Sj_Blaster_Grouper_5413_MAP_3	LTR	Novel	2215	451	1764	143.9	812.3	91.4	357.6	73.5	217.1	142.2	377
Sj_Blaster_Grouper_12995_MAP_6	LTR	Novel	2212.8	487.6	1725.2	133.6	771.7	103	353.1	86.2	227.2	164.8	373.2
Sj_Blaster_Grouper_12791_MAP_3	LTR	Novel	2212.5	560.6	1651.9	255.2	911	85.4	225.8	11.7	35.1	208.3	480
Sj_Blaster_Grouper_29722_MAP_3	LTR	NONAUT-3_1p	2212.4	1158.1	1054.3	350.5	371.4	263.6	199.6	192.4	153.9	351.6	329.4
Sj_Blaster_Grouper_24359_MAP_4	LTR	Novel	2211.8	919.8	1292	130.5	164.3	121.6	191.3	29.9	107.2	637.8	829.2
Sj_Blaster_Grouper_12561_MAP_19	LTR	Novel	2211.7	978.1	1233.6	431.8	586.5	263	259.9	79.5	152.4	203.8	234.8
Sj_Blaster_Grouper_28883_MAP_6	LTR	Novel	2207.7	1138.5	1069.2	566	467.6	218.8	319.2	103.5	101.8	250.2	180.6
Sj_Blaster_Grouper_4058_MAP_20	LTR	Novel	2207.5	1060.2	1147.3	471	518.9	277.8	261.7	86.4	136.2	225	230.5
Sj_Blaster_Grouper_27833_MAP_8	LTR	Novel	2207.2	1215.3	991.9	385.5	278.1	189.1	174.6	253.8	179.3	386.9	359.9
Sj_Blaster_Grouper_24568_MAP_4	LTR	Novel	2205.4	1475.7	729.7	777.6	325	294.3	181	148.4	68	255.4	155.7
Sj_Blaster_Grouper_12742_MAP_20	LTR	Novel	2205.4	534.4	1671	161	749.5	103.6	342.6	90.4	218.5	179.4	360.4
Sj_Blaster_Grouper_21594_MAP_3	LTR	Novel	2203.5	637.9	1565.6	270.4	813.8	104	226.5	16.5	32.6	247	492.7
Sj_Blaster_Grouper_15268_MAP_20	LTR	Novel	2203.1	1504.1	699	819.3	256.9	203.9	127.2	32.8	66.2	448.1	248.7
Sj_Blaster_Grouper_20831_MAP_3	LTR	Novel	2200.5	674.8	1525.7	226.2	496.4	148.8	265.3	76.9	257.7	222.9	506.3
Sj_Blaster_Grouper_27005_MAP_10	LTR	Novel	2199.8	1437	762.8	432.2	165.3	368.4	192.2	323.5	212.4	312.9	192.9
Sj_Blaster_Grouper_6530_MAP_5	LTR	Novel	2199.6	1111.5	1088.1	547.6	622.8	315.2	192	115.8	144.5	132.9	128.8
Sj_Blaster_Grouper_29387_MAP_3	LTR	Novel	2199.6	1431.8	767.8	444	226.1	296.7	168.5	247.4	120.1	443.7	253.1
Sj_Blaster_Grouper_11163_MAP_4	LTR	Novel	2197.8	1108.7	1089.1	633.1	542.2	196.9	303.4	147.3	113.2	131.4	130.3
Sj_Blaster_Grouper_12875_MAP_5	LTR	Novel	2197.7	1002.9	1194.8	416.3	468.8	204.9	221.8	185.7	253.7	196	250.5
Sj_Blaster_Grouper_28038_MAP_6	LTR	Novel	2196.8	685.3	1511.5	356.8	551.8	119.5	485.6	59	162.6	150	311.5
Sj_Blaster_Grouper_21663_MAP_15	LTR	Novel	2196.6	1204.6	992	751.8	444.8	207	251.4	64.8	90.1	181	205.7
Sj_Blaster_Grouper_15729_MAP_20	LTR	Novel	2196.5	392.2	1804.3	143.3	844.4	86.7	364.2	50.3	218.5	111.9	377.2
Sj_Blaster_Recon_399_MAP_20	LTR	Novel	2196	725.3	1470.7	327.1	612.8	120.3	280.9	106.4	217.4	171.5	359.6
Sj_Blaster_Grouper_26172_MAP_7	LTR	Novel	2194.6	661.9	1532.7	301.6	808.7	170.3	339.3	63.6	140.3	126.4	244.4
Sj_Blaster_Grouper_17618_MAP_5	LTR	Novel	2194.5	1469	725.5	776.4	321.6	208.8	120.2	33.2	17.6	450.6	266.1
Sj_Blaster_Grouper_23398_MAP_7	LTR	Novel	2194.1	1427.4	766.7	385.2	287.9	349.9	153	245	111.2	447.3	214.6
Sj_Blaster_Grouper_27602_MAP_3	LTR	Novel	2192.9	837.7	1355.2	404.6	520.8	166.4	422.1	73.9	141.9	192.8	270.4
Sj_Blaster_Grouper_33649_MAP_3	LTR	Novel	2192.5	1452	740.5	155.5	102.3	209.5	95.6	117.3	24.4	969.7	518.2
Sj_Blaster_Grouper_11957_MAP_3	LTR	Novel	2189.3	1104	1085.3	632.6	541.1	194.1	301.7	146.9	112.1	130.4	130.4
Sj_Blaster_Grouper_27853_MAP_3	LTR	Novel	2189	892.2	1296.8	503.7	470.9	146.9	415.5	67.1	141.2	174.5	269.2
Sj_Blaster_Grouper_18719_MAP_3	LTR	Novel	2188.8	728.1	1460.7	324.7	766.9	121.4	211.5	16.9	39.3	265.1	443
Sj_Blaster_Grouper_24734_MAP_3	LTR	Novel	2188.6	1529.8	658.8	803.3	304.8	336.2	132.1	145.8	67	244.5	154.9
Sj_Blaster_Grouper_23856_MAP_5	LTR	Novel	2187.8	713.4	1474.4	343.4	748	175.5	337.1	60.8	144.6	133.7	244.7
[truncated: 8,750 more rows]
