# Supplementary material for: Profiles of Small Non-Coding RNAs in Schistosoma japonicum during Development
Source: PLoS Negl Trop Dis. 2011 Aug 2;5(8):e1256. doi: 10.1371/journal.pntd.0001256 (PMC3149011; doi:10.1371/journal.pntd.0001256)
Supplement: Table S13 — Expression level of siRNAs derived from TIR in cercariae, lung-stage schistosomula, male and female adult worms. (XLS) [file pntd.0001256.s013.xls]

## Sheet: TE_TIR_TPM
Table S13. Expression level of TIR-derived siRNAs
Name	Type	Annotation	Total Expression			SjC Expression		SjL Expression		SjM Expression		SjF Expression
			Total	Sense	Antisense	Sense	Antisense	Sense	Antisense	Sense	Antisense	Sense	Antisense
Sj_Blaster_Grouper_28274_MAP_4	TIR	Novel	287189	96.3	287093	77.8	24596.5	11.1	63126.5	5.7	93604.8	1.7	105765
Sj_Blaster_Grouper_17413_MAP_7	TIR	Novel	4266.8	1657.1	2609.7	870.5	1458.8	531.2	797.6	83.7	112.7	171.7	240.6
Sj_Blaster_Grouper_16060_MAP_3	TIR	Novel	4002.7	2480.3	1522.4	1432.8	788.9	746.9	481.8	109.2	82.1	191.4	169.6
Sj_Blaster_Grouper_23074_MAP_3	TIR	Novel	3874.7	1520.5	2354.2	830.5	1420.4	481.6	681.6	65.8	88.3	142.6	163.9
Sj_Blaster_Grouper_21644_MAP_3	TIR	Novel	3618.9	1530.2	2088.7	841	1321.7	481.5	590.6	65.7	72.2	142	104.2
Sj_Blaster_Recon_7337_MAP_14	TIR	SmTRC1_1p	3417.9	1303.4	2114.5	681.5	1259.7	416	639.6	63.8	88.4	142.1	126.8
Sj_Blaster_Grouper_18281_MAP_4	TIR	Novel	3393.5	1944.9	1448.6	1171.6	792.4	583.2	454	73.5	64	116.6	138.2
Sj_Blaster_Grouper_4235_MAP_3	TIR	Novel	3113.1	1899.4	1213.7	966.9	653.6	662.6	391	76.6	54.4	193.3	114.7
Sj_Blaster_Grouper_10968_MAP_9	TIR	SmTRC1_1p	2844.9	1586.9	1258	932.2	661	475.8	389	73.8	72.8	105.1	135.2
Sj_Blaster_Grouper_6244_MAP_4	TIR	Novel	2633.2	1429.8	1203.4	739.8	588.2	525.1	412	57.6	68.7	107.3	134.5
Sj_Blaster_Grouper_9536_MAP_6	TIR	Novel	2394.8	1026.5	1368.3	519.6	704.6	350	507.6	49.4	55.7	107.5	100.4
Sj_Blaster_Grouper_12523_MAP_7	TIR	Novel	1424	978.8	445.2	626.6	235.4	216.5	115.3	47.2	31.9	88.5	62.6
Sj_Blaster_Grouper_8573_MAP_3	TIR	Novel	1384.6	1021.2	363.4	667.8	177.7	215.5	98.8	52.9	30.7	85	56.2
Sj_Blaster_Grouper_10037_MAP_5	TIR	Novel	1343.2	1069.7	273.5	706.5	170.8	227.9	54.8	51.5	13	83.8	34.9
Sj_Blaster_Grouper_7021_MAP_3	TIR	Novel	1334.9	1069.9	265	706.9	165.4	227.6	52.7	51.5	12.8	83.9	34.1
Sj_Blaster_Grouper_21275_MAP_3	TIR	SmTRC1_1p	1241.5	1034.4	207.1	680.9	118.4	222.6	43.8	51	12.7	79.9	32.2
Sj_Blaster_Grouper_11613_MAP_5	TIR	Novel	1205.3	289.2	916.1	177.3	674.5	69.8	155	12.3	34	29.8	52.6
Sj_Blaster_Grouper_5396_MAP_4	TIR	Novel	887.4	177.8	709.6	100.7	457.8	34.9	143.4	12	45.4	30.2	63
Sj_Blaster_Grouper_14226_MAP_3	TIR	SmTRC1_1p	885.2	199.8	685.4	89.3	353.7	71.2	222.3	8.9	28.1	30.4	81.3
Sj_Blaster_Grouper_11671_MAP_8	TIR	Novel	863	262.7	600.3	165.8	371.7	51.4	125.3	13.4	39.2	32.1	64.1
Sj_Blaster_Grouper_11654_MAP_6	TIR	Novel	630.8	623.6	7.2	94.6	0.7	175.6	1.2	203.6	3.3	149.8	2
Sj_Blaster_Grouper_398_MAP_4	TIR	Novel	579.6	201	378.6	82.3	250.4	69.7	96	19.2	8	29.8	24.2
Sj_Blaster_Grouper_6139_MAP_5	TIR	Novel	329.1	305.8	23.3	186.8	11.4	88.5	6.9	15	0.6	15.5	4.4
Sj_Blaster_Grouper_7901_MAP_5	TIR	Novel	176.2	16.7	159.5	9	78.9	3.8	59.7	0.4	8.3	3.5	12.6
Sj_Blaster_Grouper_8234_MAP_3	TIR	Novel	130.3	129.4	0.9	3.7	0	30.2	0.1	41.6	0.6	53.9	0.2
Sj_Blaster_Grouper_25721_MAP_3	TIR	Novel	20.4	9.1	11.3	1.8	2.9	2.8	1.9	1.6	2	2.9	4.5
Sj_Blaster_Grouper_31627_MAP_3	TIR	Novel	13	4.4	8.6	2.1	3.5	0.6	2	0.7	0.1	1	3
Sj_Blaster_Grouper_27665_MAP_3	TIR	Novel	11	5.4	5.6	0	0.1	0.7	0.7	3.2	3.2	1.5	1.6
Sj_Blaster_Recon_108_MAP_13	TIR	Novel	5.1	2.9	2.2	0.8	1.4	0.9	0.3	0.2	0.2	1	0.3
Sj_Blaster_Grouper_16258_MAP_3	TIR	Novel	5.1	1.3	3.8	0.1	0.9	0.1	1.3	0.5	0.5	0.6	1.1
Sj_Blaster_Grouper_28236_MAP_3	TIR	Novel	5	2.5	2.5	1.1	1.1	1	1	0	0	0.4	0.4
Sj_Blaster_Grouper_13008_MAP_4	TIR	Novel	3.2	2.7	0.5	2.6	0.2	0	0	0	0.2	0.1	0.1
Sj_Blaster_Grouper_12673_MAP_4	TIR	Novel	3	0.3	2.7	0	1	0	0.9	0	0.2	0.3	0.6
Sj_Blaster_Grouper_28519_MAP_4	TIR	Novel	2.8	1.2	1.6	0.1	0.4	0.1	0	0	0.1	1	1.1
Sj_Blaster_Recon_8695_MAP_4	TIR	Novel	2.8	1.6	1.2	0.1	0.4	0.4	0.3	0.1	0.1	1	0.4
Sj_Blaster_Grouper_24847_MAP_3	TIR	Novel	2.8	2.2	0.6	0.7	0.6	0.7	0	0.4	0	0.4	0
Sj_Blaster_Recon_11319_MAP_5	TIR	MERLIN2_SM_1p	2.6	0.2	2.4	0.2	0.7	0	0.9	0	0.4	0	0.4
Sj_Blaster_Recon_4551_MAP_12	TIR	MERLIN1_SM_1p	2.5	1.9	0.6	1.3	0.3	0.2	0.1	0	0.1	0.4	0.1
Sj_Blaster_Piler_163.352_MAP_5	TIR	Novel	2.5	1.7	0.8	1.2	0.3	0.1	0.2	0	0.2	0.4	0.1
Sj_Blaster_Recon_3540_MAP_10	TIR	MERLIN1_SM_1p	2.4	0.3	2.1	0	0.6	0	0.7	0	0.2	0.3	0.6
Sj_Blaster_Grouper_10473_MAP_5	TIR	Novel	2.3	2	0.3	0.6	0	0.7	0	0.1	0	0.6	0.3
Sj_Blaster_Grouper_11992_MAP_7	TIR	Novel	2.3	0.3	2	0	0.5	0	0.7	0	0.2	0.3	0.6
Sj_Blaster_Piler_296.174_MAP_6	TIR	Novel	2.3	0.3	2	0	0.5	0	0.7	0	0.2	0.3	0.6
Sj_Blaster_Recon_16167_MAP_5	TIR	MERLIN2_SM_1p	2.3	0.3	2	0	0.3	0.1	1	0	0	0.2	0.7
Sj_Blaster_Grouper_14329_MAP_6	TIR	Novel	2.3	1.6	0.7	1.2	0.3	0.1	0.2	0	0.1	0.3	0.1
Sj_Blaster_Grouper_30291_MAP_3	TIR	Novel	2	1.2	0.8	0.2	0.2	0.5	0.2	0.2	0.2	0.3	0.2
Sj_Blaster_Grouper_12281_MAP_3	TIR	Novel	2	1.4	0.6	1.1	0.3	0.1	0.1	0	0.1	0.2	0.1
Sj_Blaster_Grouper_19704_MAP_3	TIR	Novel	1.4	0.7	0.7	0.6	0.1	0	0.6	0	0	0.1	0
Sj_Blaster_Recon_4500_MAP_4	TIR	MERLIN2_SM_1p	1.4	0.4	1	0.1	0.2	0.3	0.1	0	0.6	0	0.1
Sj_Blaster_Recon_1984_MAP_6	TIR	MERLIN2_SM_1p	1.4	0.4	1	0.1	0.2	0.1	0.2	0.1	0.3	0.1	0.3
Sj_Blaster_Grouper_6255_MAP_3	TIR	Novel	1.3	0.6	0.7	0.2	0.2	0.1	0	0.3	0.1	0	0.4
Sj_Blaster_Piler_377.234_MAP_3	TIR	Chapaev-8_HM	1.3	0.6	0.7	0.2	0.2	0.1	0	0.3	0.1	0	0.4
Sj_Blaster_Grouper_22672_MAP_3	TIR	Novel	1.2	0.6	0.6	0.1	0.1	0.2	0.2	0.1	0.1	0.2	0.2
Sj_Blaster_Recon_2986_MAP_4	TIR	SmTRC1_1p	0.8	0.6	0.2	0	0	0.1	0	0.3	0	0.2	0.2
Sj_Blaster_Recon_4847_MAP_3	TIR	MERLIN2_SM_1p	0.6	0.5	0.1	0	0	0	0	0	0	0.5	0.1
Sj_Blaster_Grouper_31239_MAP_3	TIR	Novel	0.6	0.4	0.2	0.1	0.1	0	0	0	0	0.3	0.1
Sj_Blaster_Piler_211.339_MAP_3	TIR	Novel	0.5	0	0.5	0	0.2	0	0	0	0.2	0	0.1
Sj_Blaster_Piler_619.174_MAP_4	TIR	Novel	0.5	0.4	0.1	0.3	0	0	0.1	0.1	0	0	0
Sj_Blaster_Grouper_6570_MAP_5	TIR	Novel	0.4	0.1	0.3	0	0.2	0.1	0	0	0	0	0.1
Sj_Blaster_Recon_2418_MAP_3	TIR	Novel	0.4	0	0.4	0	0.1	0	0	0	0.2	0	0.1
Sj_Blaster_Grouper_22580_MAP_3	TIR	Novel	0.4	0.2	0.2	0	0	0.2	0.2	0	0	0	0
Sj_Blaster_Grouper_7907_MAP_3	TIR	Novel	0.4	0	0.4	0	0.1	0	0	0	0.2	0	0.1
Sj_Blaster_Grouper_12095_MAP_4	TIR	Novel	0.3	0	0.3	0	0.2	0	0	0	0.1	0	0
Sj_Blaster_Recon_1191_MAP_4	TIR	Novel	0.3	0	0.3	0	0.2	0	0	0	0.1	0	0
Sj_Blaster_Recon_9914_MAP_3	TIR	Novel	0.3	0	0.3	0	0.2	0	0	0	0	0	0.1
Sj_Blaster_Piler_505.16_MAP_4	TIR	Novel	0.2	0	0	0	0	0	0	0	0	0	0
Sj_Blaster_Grouper_17309_MAP_3	TIR	Novel	0.2	0.1	0.1	0	0	0	0	0	0	0.1	0.1
Sj_Blaster_Recon_9722_MAP_4	TIR	MERLIN1_SM_1p	0.2	0.1	0.1	0.1	0	0	0	0	0.1	0	0
Sj_Blaster_Grouper_23601_MAP_3	TIR	EnSpm-2_HM	0.1	0	0	0	0	0	0	0	0	0	0
Sj_Blaster_Grouper_5270_MAP_3	TIR	Novel	0.1	0	0.1	0	0.1	0	0	0	0	0	0
Sj_Blaster_Grouper_31265_MAP_6	TIR	Novel	0.1	0	0	0	0	0	0	0	0	0	0
Sj_Blaster_Recon_8495_MAP_3	TIR	SmTRC1_1p	0.1	0	0.1	0	0	0	0	0	0	0	0.1
Sj_Blaster_Recon_5836_MAP_3	TIR	Novel	0.1	0	0	0	0	0	0	0	0	0	0
